# Supplementary material for: The universal vibrational dynamics of water bound to tertiary amines: more than just Fermi resonance
Source: Royal Society of Chemistry journal article supplement (doi:10.1039/d5cp00332f), 2025-01-01
Supplement: d5cp00332f1.pdf [file d5cp00332f1.pdf]

# The universal vibrational dynamics of water bound to tertiary amines: More than just Fermi resonance ESI

Eaindra Lwin, Nils O. B. Lüttchwager, Martin A. Suhm\*

*Institute of Physical Chemistry, University of Göttingen, Tammannstr. 6, 37077 Göttingen  
(Germany). E-mail: msuhm@gwdg.de*

Note: The supplement is a collection of 3 different documents, labelled Part 1 to 3. Be sure to scroll past the references of Part 1 to find the remaining two parts. Part 2 explains the algorithm used to derive coupling elements and deperturbed positions (Julia package “Fermi4x4”), Part 3 shows the data evaluation notebook which uses Fermi4x4 to derive the deperturbation results presented in the main paper.

## Part 1: Supplementary Figures and Tables

### Contents

|                                                                               |            |
|-------------------------------------------------------------------------------|------------|
| <b>1 Experiment</b>                                                           | <b>S3</b>  |
| 1.1 Investigated compounds . . . . .                                          | S3         |
| 1.2 Experimental details . . . . .                                            | S3         |
| <b>2 Individual band centers and intensities from experimental spectra</b>    | <b>S6</b>  |
| 2.1 Method I . . . . .                                                        | S6         |
| 2.2 Method II . . . . .                                                       | S6         |
| 2.3 Method III . . . . .                                                      | S6         |
| 2.4 Method IV . . . . .                                                       | S6         |
| <b>3 Harmonic modeling</b>                                                    | <b>S9</b>  |
| 3.1 Details on harmonic calculations . . . . .                                | S9         |
| <b>4 Four anharmonic coupling models</b>                                      | <b>S12</b> |
| <b>5 Isotope effect in the monohydrates of tertiary amines</b>                | <b>S14</b> |
| <b>6 Perturbed and deperturbed ON stretching vibration in models C and C'</b> | <b>S20</b> |
| <b>7 Quantum chemical bridging</b>                                            | <b>S22</b> |
| <b>8 Methylation instead of deuteration</b>                                   | <b>S24</b> |
| <b>9 Dihydrate contributions to the HyDRA database</b>                        | <b>S26</b> |
| <b>10 Experimental spectra of triisopropylamine (IIIN)</b>                    | <b>S30</b> |
| <b>11 Example inputs for transition states</b>                                | <b>S32</b> |
| <b>References</b>                                                             | <b>S33</b> |

### List of Tables

|                                                                                                        |    |
|--------------------------------------------------------------------------------------------------------|----|
| S1 Table of investigated compounds . . . . .                                                           | S3 |
| S2 Experimental details for the FTIR spectra in the main text and supplementary information . . . . .  | S4 |
| S3 Experimental details for the Raman spectra in the main text and supplementary information . . . . . | S5 |
| S4 Experimental band centers for the resonance tetrad . . . . .                                        | S7 |
| S5 Experimental intensities for the resonance tetrad . . . . .                                         | S8 |
| S6 Harmonic prediction of OHb, b2, b2ON, b2ON2 and OHbON for amine monohydrates . . . . .              | S9 |

|     |                                                                                                             |     |
|-----|-------------------------------------------------------------------------------------------------------------|-----|
| S7  | Relative energy for two different conformers of MMIN and its monohydrate . . . . .                          | S10 |
| S8  | Relative energy for two different conformers of MMCN and its monohydrate . . . . .                          | S11 |
| S9  | Coupling constants and deperturbed positions using coupling model A . . . . .                               | S13 |
| S10 | Coupling constants and deperturbed positions using coupling model B . . . . .                               | S13 |
| S11 | Deperturbed positions using coupling model C . . . . .                                                      | S13 |
| S12 | Coupling constants using coupling model C . . . . .                                                         | S13 |
| S13 | Experimental and harmonic H/D isotope effect on OHb for tertiary amine monohydrates . . . . .               | S15 |
| S14 | Raw and different deperturbed OHb wavenumbers for tertiary amine monohydrates . . . . .                     | S16 |
| S15 | Experimental <sup>16/18</sup> O isotope effects on OHb wavenumbers of tertiary amine monohydrates . . . . . | S20 |
| S16 | Raw and deperturbed wavenumbers by applying model C for ON and 2ON . . . . .                                | S20 |
| S17 | Anharmonicity constants by applying model C for ON and 2ON . . . . .                                        | S21 |
| S18 | Raw and deperturbed wavenumbers by applying model C' for ON . . . . .                                       | S21 |
| S19 | Relative energy for three different conformers of EEEN monomer using B3LYP-D3/def2-TZVP . . . . .           | S22 |
| S20 | Relative energy for three different conformers of EEEN monohydrate using B3LYP-D3/def2-TZVP . . . . .       | S22 |
| S21 | Harmonic and deperturbed wavenumbers of EEEN monohydrates by using coupling model C . . . . .               | S23 |
| S22 | Perturbed wavenumbers and intensities of EEEN monohydrates by using coupling model C . . . . .              | S23 |
| S23 | Harmonic and deperturbed wavenumbers of EEEN monohydrates by using coupling model C' . . . . .              | S23 |
| S24 | Perturbed wavenumbers and intensities of EEEN monohydrates by using coupling model C' . . . . .             | S23 |
| S25 | Harmonic ON and OHb wavenumbers in complexes of tertiary amines with MeOH . . . . .                         | S24 |
| S26 | Hydrogen bond torsion angles in complexes of amines with water and methanol . . . . .                       | S25 |
| S27 | Example input for NEB scan . . . . .                                                                        | S32 |
| S28 | Example input for transition state calculation . . . . .                                                    | S32 |

## List of Figures

|     |                                                                                                    |     |
|-----|----------------------------------------------------------------------------------------------------|-----|
| S1  | Two conformers of N,N-dimethylisopropylamine (MMIN) monomer and its monohydrate . . . . .          | S10 |
| S2  | Two conformers of N,N-dimethylcyclohexylamine (MMCN) monomer and its monohydrate . . . . .         | S11 |
| S3  | Coupling model A . . . . .                                                                         | S12 |
| S4  | Coupling model B . . . . .                                                                         | S12 |
| S5  | Coupling model C . . . . .                                                                         | S12 |
| S6  | Coupling model C' . . . . .                                                                        | S12 |
| S7  | Cold spectra of MN4 with HOH and DOH . . . . .                                                     | S14 |
| S8  | Cold spectra of MMCN with HOH and DOH . . . . .                                                    | S15 |
| S9  | Cold spectra of MMTN with HOH and DOH . . . . .                                                    | S16 |
| S10 | Cold Raman spectra of MMTN with HOH and FTIR spectra with DOH . . . . .                            | S17 |
| S11 | Comparison of FTIR and Raman spectra for the monohydrate of MMTN . . . . .                         | S18 |
| S12 | Cold spectra for isotope substitution of water with tertiary amines . . . . .                      | S19 |
| S13 | Cold spectra of MN5 with <sup>16</sup> OH <sub>2</sub> and <sup>18</sup> OH <sub>2</sub> . . . . . | S19 |
| S14 | Three conformers of triethylamine (EEEN) monohydrate . . . . .                                     | S22 |
| S15 | Illustration of the torsion angle of water and methanol docking to an amine . . . . .              | S24 |
| S16 | Spectra for MN4+HOH, MN4+DOH and MN4+MeOH . . . . .                                                | S25 |
| S17 | Dihydrate spectra of MN5 . . . . .                                                                 | S26 |
| S18 | Dihydrate spectra of MMCN . . . . .                                                                | S27 |
| S19 | Dihydrate spectra of MMTN . . . . .                                                                | S28 |
| S20 | Dihydrate spectra of N555 . . . . .                                                                | S29 |
| S21 | Dihydrate spectra of IIIN . . . . .                                                                | S30 |
| S22 | Spectral comparison of IIIN and MN5MMMM with water . . . . .                                       | S31 |
| S23 | Spectral comparison of IIIN and MMCN with water . . . . .                                          | S31 |

# 1 Experiment

## 1.1 Investigated compounds

Table S1 gives details about the studied chemicals and introduces their codes (acronyms) used in the main document.

**Table S1:** Table of employed chemicals, their code names (supplement and main document), their CAS number, the supplier, purity and Lot#.

| Name                            | Code             | CAS Number | Supplier | Purity  | Lot#            |
|---------------------------------|------------------|------------|----------|---------|-----------------|
| N-Methylpyrrolidine             | MN4              | 120-94-5   | TCI      | 98%     | QV5SL-KH        |
| N-Methylpiperidine              | MN5              | 626-67-5   | TCI      | 99%     | BK82C-SY        |
| 1-Azabicyclooctane              | N555             | 100-76-5   | BLDpharm | 98%     | -               |
| 1,2,2,6,6-Pentamethylpiperidine | MN5MMMM          | 79-55-0    | BLDpharm | 99.85%  | DRX383          |
| N,N-Dimethylethylamine          | MMEN             | 598-56-1   | TCI      | 98%     | PV8KA-UD        |
| N,N-Dimethylisopropylamine      | MMIN             | 996-35-0   | TCI      | 99%     | FGI01-CI        |
| N,N-Dimethylcyclohexylamine     | MMCN             | 98-94-2    | TCI      | 98%     | A6M8I-OH        |
| <i>tert</i> -Butyldimethylamine | MMTN             | 918-02-5   | Angene   | 97%     | AGN23-1430724-1 |
| Triethylamine                   | EEEN             | 121-44-8   | TCI      | 99%     | JUJ3F-TU        |
| Triisopropylamine               | IIIN             | 3424-21-3  | ChemCruz | -       | K2223           |
| Methanol                        | MeOH             | 67-56-1    | TCI      | 99.8%   | NOSCB-PS        |
| Demineralised water             | H <sub>2</sub> O | 7732-18-5  | -        | -       | -               |
| Deuterated water                | D <sub>2</sub> O | 7789-20-0  | Abcr     | 99.85%  | AB-403423       |
| Helium                          | He               | 7440-59-7  | Nippon   | 99.996% | -               |
| Neon                            | Ne               | 7440-59-7  | Linde    | 99.999% | -               |

## 1.2 Experimental details

All FTIR spectra were obtained using the *gratin* jet spectrometer (for a detailed description see [1]) and important parameters for the recorded spectra can be found in Table S2. The spectral traces in the range of 4000 - 2200 cm<sup>-1</sup> are provided here: dataset.

Details of the experimental setup for the Raman measurements are given in [2] and more information on the recorded Raman spectra can be found in Table S3. All Raman experimental spectra in the range of 4000 - 2200 cm<sup>-1</sup> are also provided here: dataset.

**Table S2:** Spectroscopic details of FTIR spectra shown in Figs. 1, 2, 4, 5, 6, 10, 11 and 12 from the main text and Figs. S7, S8, S9, S10, S11, S12, S13, S16, S17, S18, S19, S20, S21, S22, S23 from the ESI. The partial pressures of the amine ( $p_A$ ), the solvent ( $p_S$ ) such as water  $H_2O$ , deuterated water  $D_2O$  or methanol  $MeOH$ , as well as the carrier gases helium ( $p_{He}$ ) or neon ( $p_{Ne}$ ) and the total stagnation pressure of the expansion ( $p_s$ ) are given. The background pressure in the buffer chamber oscillates between about 0.01 and 0.1 hPa for Ne. The spectra were obtained by averaging # FTIR scans, each synchronized to a 133 ms gas pulse through a 700 mm $\times$ 0.2 mm slit nozzle with a Bruker VERTEX 70v FTIR spectrometer in double-sided mode at 140 kHz scanning speed. A 20 W tungsten light source, an InSb/HgCdTe sandwich detector and an optical filter (wavenumber range  $<4000\text{ cm}^{-1}$ ) were used. The recording date of the spectra is given in a dd/mm/yyyy format and the last column is indicated in which figures in the main publication and the ESI, the corresponding spectrum is shown.

| $p_A$ /hPa | $p_S$ /hPa  | $p_{He}$ /hPa | $p_{Ne}$ /hPa | $p_s$ /hPa | #    | dd/mm/yyyy    | Figure           |
|------------|-------------|---------------|---------------|------------|------|---------------|------------------|
| MMEN       | $H_2O$      |               |               |            |      |               |                  |
| 0.2        | 0.4         | 749           | 0             | 750        | 700  | 30/10/2023    | 6,12             |
| MN4        |             |               |               |            |      |               |                  |
| 0.2        | 0.4         | 749           | 0             | 750        | 1000 | 27/07/2023    | 4,12,S7, S16     |
| N555       |             |               |               |            |      |               |                  |
| 0.1        | 0.4         | 749           | 0             | 750        | 800  | 12/06/2023    | 5,12S20          |
| 0.1        | 0.1         | 750           | 0             | 750        | 800  | 31/05/2023    | S20              |
| MN5        |             |               |               |            |      |               |                  |
| 0.2        | 0.4         | 749           | 0             | 750        | 800  | 28/06/2023    | 1,12,S13,S17     |
| 0.2        | 0.0         | 750           | 0             | 750        | 800  | 26/06/2023    | S17              |
| MMIN       |             |               |               |            |      |               |                  |
| 0.2        | 0.4         | 749           | 0             | 750        | 900  | 16/11/2023    | 6,12             |
| MMCN       |             |               |               |            |      |               |                  |
| 0.2        | 0.2         | 750           | 0             | 750        | 1000 | 04/07/2023    | 6,12,S8,S18, S23 |
| 0.2        | 0.0         | 750           | 0             | 750        | 1000 | 03/07/2023    | S18              |
| MMTN       |             |               |               |            |      |               |                  |
| 0.1        | 0.2         | 0             | 400           | 400        | 800  | 16/10/2024    | 6,12,S9,S11,S19  |
| 0.2        | 0.2         | 750           | 0             | 750        | 800  | 29/01/2024    | S19              |
| MN5MMMM    |             |               |               |            |      |               |                  |
| 0.2        | 0.4         | 749           | 0             | 750        | 800  | 21/02/2024    | 2,12             |
| EEEN       |             |               |               |            |      |               |                  |
| 0.2        | 0.4         | 749           | 0             | 750        | 1000 | 13/09/2023    | 10               |
| IIN        |             |               |               |            |      |               |                  |
| 0.2        | 0.7         | 749           | 0             | 750        | 2000 | 22+25/01/2024 | S21,S22, S23     |
| 0.2        | 0.4         | 749           | 0             | 750        | 2000 | 22/01/2024    | S21              |
| MN4        | $D_2O$      |               |               |            |      |               |                  |
| 0.2        | 0.4         | 0             | 399           | 400        | 200  | 08/04/2024    | S7,S16           |
| MN5        |             |               |               |            |      |               |                  |
| 0.2        | 0.8         | 749           | 0             | 750        | 700  | 08/08/2023    | 1, S12           |
| MMCN       |             |               |               |            |      |               |                  |
| 0.2        | 0.8         | 749           | 0             | 750        | 400  | 11/08/2023    | S8               |
| MMTN       |             |               |               |            |      |               |                  |
| 0.2        | 0.4         | 0             | 399           | 400        | 500  | 21/03/2024    | S9, S10          |
| MN5MMMM    |             |               |               |            |      |               |                  |
| 0.2        | 0.4         | 0             | 399           | 400        | 500  | 20/03/2024    | 2,S12            |
| N555       | $^{18}OH_2$ |               |               |            |      |               |                  |
| 0.1        | 0.4         | 750           | 0             | 750        | 800  | 13/06/2023    | 5                |
| MN5        |             |               |               |            |      |               |                  |
| 0.2        | 0.4         | 749           | 0             | 750        | 1000 | 24/10/2023    | S13              |
| MN4        | $MeOH$      |               |               |            |      |               |                  |
| 0.2        | 0.1         | 0             | 400           | 400        | 500  | 28/06/2024    | 11,S16           |
| MMCN       |             |               |               |            |      |               |                  |
| 0.1        | 0.1         | 0             | 400           | 400        | 700  | 18/10/2024    | 11               |
| MMTN       |             |               |               |            |      |               |                  |
| 0.2        | 0.2         | 0             | 400           | 400        | 500  | 31/05/2024    | 11               |
| MN5MMMM    |             |               |               |            |      |               |                  |
| 0.2        | 0.2         | 0             | 400           | 400        | 500  | 10/05/2024    | 11               |

**Table S3:** Details of the Raman spectra in Fig. 4 from the main text and Figs. S10 and S11 from the ESI. Column labels have the same meaning as in Table S2. Note that since the Raman jet-setup probes a continuous expansion, but the FTIR jet-setup probes pulses, and gas is filled in the full vacuum part of the Raman setup (with the circulation switched off) but only in the reservoir of the FTIR setup when preparing the gas samples, the stagnation pressure  $p_s$  and carrier gas partial pressure  $p_{\text{He/Ne}}$  are almost identical in case of FTIR measurements, but quite distinct for Raman measurements. Additional columns in this table are:  $p_0$  — background pressure in expansion chamber, T — overall exposure time. MN4 spectra were recorded at a nozzle distance of 1 mm, MMTN spectra at 2 mm. The laser output power was set between 18 and 20 W.

| $p_A/\text{hPa}$ | $p_w/\text{hPa}$ | $p_{\text{He}}/\text{hPa}$ | $p_{\text{Ne}}/\text{hPa}$ | $p_s/\text{hPa}$ | $p_0/\text{hPa}$ | T/h:min | dd/mm/yyyy | Figure  |
|------------------|------------------|----------------------------|----------------------------|------------------|------------------|---------|------------|---------|
| MN4              | H <sub>2</sub> O |                            |                            |                  |                  |         |            |         |
| 0.1              | >0.2             | —                          | 90                         | 500              | 6                | 1:30    | 06/02/2024 | 4       |
| 0.4              | —                | —                          | 90                         | 500              | 6                | 0:35    | 05/02/2024 | 4       |
| MMTN             |                  |                            |                            |                  |                  |         |            |         |
| 0.2              | 0.4              | 100                        | —                          | 500              | 9                | 5:20    | 12/03/2024 | S10,S11 |
| 0.4              | —                | 100                        | —                          | 500              | 9                | 2:20    | 18/03/2024 | S10,S11 |

## 2 Individual band centers and intensities from experimental spectra

To determine the deperturbed positions  $D$  of b2, OHb, b2ON and xONn and the coupling constants  $W$  between them by using different models as described in the main text, the individual experimental band centers and intensities have to be extracted. The spectra in the range 3050 - 3550  $\text{cm}^{-1}$  as shown in Fig. 12 of the main text are evaluated by integrating the area  $I$  under the individual bands, also resulting in individual uncertainties  $\Delta I$ . The center  $\tilde{\nu}$  of a band system is taken as the intensity center or center of gravity and has an uncertainty  $\Delta\tilde{\nu}$ . It is usually close to the intensity maximum of the individual band.

$I$  and  $\tilde{\nu}$  are estimated based on four different integration methods for the individual areas  $I$ . The four integration methods (I, II, III, IV) are described in detail below. The resulting band centers  $\tilde{\nu}$  and intensities  $I$  as well as their uncertainties  $\Delta\tilde{\nu}$  and  $\Delta I$  of each method for the four bands (b2, OHb, b2ON and xONn) are given in Table S4 and S5. All four methods are largely based on the NoisySignalIntegration method by Nils O. B. Lüttschwager [3], which allows for different settings of the integration windows. Briefly, the program analyzes the actual noise of the spectrum in a given wavenumber range and uses this noise to simulate alternative noise with the same characteristics to a sample before the integration is performed.

The averages of the individual intensities  $\bar{I}$  and of the band centers  $\bar{\nu}$  from the four independent integration methods are also listed in Table S4 and S5 and are our best estimates of the true values. An estimate of their uncertainties  $\Delta\Delta I$  and  $\Delta\Delta\tilde{\nu}$  is obtained by determining the combined spread of the individual likelihood histograms near the 25% threshold. This would correspond to about 90% confidence ( $1.66\sigma$ ) for a Gaussian distribution.

### 2.1 Method I

A narrow integration window which is approximately centering the highest peak position of the band is chosen so that the signal remains consistently above the noise level. The integration boundaries (start and end point of the integration window) are allowed to vary by 1  $\text{cm}^{-1}$ . To give an example for the OHb band of the MMEN monohydrate which has the highest peak position at 3301  $\text{cm}^{-1}$ , the low integration boundary is selected in the 3285-3286  $\text{cm}^{-1}$  range and the high boundary in the 3316-3317  $\text{cm}^{-1}$  range.

### 2.2 Method II

A wider integration window is selected which extends significantly into the noisy baseline. At the same time, the integration start and end points are allowed to vary more strongly by 3  $\text{cm}^{-1}$ . In the MMEN example, the boundaries are chosen from the ranges 3282-3285  $\text{cm}^{-1}$  and 3317-3320  $\text{cm}^{-1}$ .

### 2.3 Method III

The integration boundaries are allowed to vary over the combined ranges of methods I and II. Staying with the MMEN example, the integration is carried out from 3282-3286  $\text{cm}^{-1}$  to 3316-3320  $\text{cm}^{-1}$ .

### 2.4 Method IV

The integration is based on a symmetric window where the start and end points have the same distance to the band maximum. The variability of the window width is chosen such that the start and end point vary by approximately 5  $\text{cm}^{-1}$ . For the main band of MMEN, the maximum position is at 3301  $\text{cm}^{-1}$  and the sampled integration window ranges from 3284-3289  $\text{cm}^{-1}$  to 3313-3318  $\text{cm}^{-1}$ .<sup>1</sup>

---

<sup>1</sup>In NoisySignalIntegration, for Methods I to III, the integration window was specified using two uniform distributions to define the start and end point, both spanning 1  $\text{cm}^{-1}$  (Method I), 3  $\text{cm}^{-1}$  (Method II), and 4  $\text{cm}^{-1}$  (Method III). For Method IV, the integration window was specified using one uniform distribution (spanning 10  $\text{cm}^{-1}$ ) for the width of the band and the peak position, which leads to symmetric integration around the central peak of the band.

**Table S4:** Experimental band centers  $\tilde{\nu}$  and their uncertainties  $\Delta\tilde{\nu}$  of four integration methods as well as average band centers  $\bar{\tilde{\nu}}$  and their uncertainties  $\Delta\Delta\tilde{\nu}$  for b2, OHb, b2ON and xONn of amine-water complexes. All values are in  $\text{cm}^{-1}$ .

| Code    | I             |                     | II            |                     | III           |                     | IV            |                     | $\bar{\tilde{\nu}}$ | $\Delta\Delta\tilde{\nu}$ |
|---------|---------------|---------------------|---------------|---------------------|---------------|---------------------|---------------|---------------------|---------------------|---------------------------|
|         | $\tilde{\nu}$ | $\Delta\tilde{\nu}$ | $\tilde{\nu}$ | $\Delta\tilde{\nu}$ | $\tilde{\nu}$ | $\Delta\tilde{\nu}$ | $\tilde{\nu}$ | $\Delta\tilde{\nu}$ |                     |                           |
| MMEN    |               |                     |               |                     |               |                     |               |                     |                     |                           |
| b2      | 3191.38       | 0.087               | 3191.37       | 0.124               | 3191.37       | 0.102               | 3191.44       | 0.26                | 3191.39             | 0.325                     |
| OHb     | 3300.95       | 0.145               | 3300.9        | 0.147               | 3300.91       | 0.131               | 3301.02       | 0.0981              | 3300.945            | 0.22                      |
| b2ON    | 3351.4        | 0.266               | 3351.78       | 0.287               | 3351.65       | 0.25                | 3351.56       | 0.268               | 3351.5975           | 0.5625                    |
| xONn    | 3447.07       | 0.47                | 3447.39       | 0.599               | 3447.4        | 0.589               | 3443.94       | 5.63                | 3446.45             | 2.0625                    |
| MN4     |               |                     |               |                     |               |                     |               |                     |                     |                           |
| b2      | 3190.54       | 0.17                | 3191.32       | 0.261               | 3191.05       | 0.224               | 3190.36       | 0.266               | 3190.8175           | 0.85                      |
| OHb     | 3299.11       | 0.147               | 3299.19       | 0.158               | 3299.16       | 0.138               | 3299.33       | 0.114               | 3299.1975           | 0.29                      |
| b2ON    | 3347.51       | 0.206               | 3347.57       | 0.224               | 3347.55       | 0.198               | 3347.72       | 0.306               | 3347.5875           | 0.45                      |
| xONn    | 3441.7        | 0.628               | 3440.89       | 0.8                 | 3441.14       | 0.662               | 3441.79       | 2.36                | 3441.38             | 1                         |
| N555    |               |                     |               |                     |               |                     |               |                     |                     |                           |
| b2      | 3193.06       | 0.0865              | 3193.36       | 0.19                | 3193.21       | 0.123               | 3193.44       | 0.188               | 3193.2675           | 0.36                      |
| OHb     | 3296.84       | 0.337               | 3296.81       | 0.355               | 3296.82       | 0.308               | 3296.29       | 0.229               | 3296.69             | 0.66                      |
| b2ON    | 3351.42       | 0.236               | 3351.05       | 0.303               | 3351.19       | 0.253               | 3351.1        | 0.193               | 3351.19             | 0.5                       |
| xONn    | 3439.74       | 0.719               | 3441.24       | 0.712               | 3440.74       | 0.627               | 3440.5        | 0.775               | 3440.555            | 1.65                      |
| MN5     |               |                     |               |                     |               |                     |               |                     |                     |                           |
| b2      | 3188.11       | 0.159               | 3189.49       | 0.27                | 3188.89       | 0.225               | 3188.35       | 0.233               | 3188.71             | 0.94                      |
| OHb     | 3289.29       | 0.133               | 3289.6        | 0.192               | 3289.49       | 0.126               | 3289.18       | 0.146               | 3289.39             | 0.405                     |
| b2ON    | 3342.28       | 0.113               | 3342.16       | 0.198               | 3342.18       | 0.143               | 3342.44       | 0.244               | 3342.265            | 0.435                     |
| xONn    | 3429.2        | 0.537               | 3429.6        | 0.655               | 3429.52       | 0.56                | 3429.66       | 1.15                | 3429.495            | 1.5                       |
| MMIN    |               |                     |               |                     |               |                     |               |                     |                     |                           |
| b2      | 3187.08       | 0.142               | 3186.99       | 0.153               | 3187.02       | 0.133               | 3186.82       | 0.121               | 3186.9775           | 0.3                       |
| OHb     | 3284.89       | 0.127               | 3284.75       | 0.135               | 3284.8        | 0.118               | 3284.42       | 0.161               | 3284.715            | 0.43                      |
| b2ON    | 3347.88       | 0.131               | 3348.13       | 0.167               | 3348.05       | 0.141               | 3347.99       | 0.145               | 3348.0125           | 0.31                      |
| xONn    | 3430.8        | 0.619               | 3430.07       | 0.466               | 3430.23       | 0.44                | 3431.29       | 1.29                | 3430.5975           | 1.4                       |
| MMCN    |               |                     |               |                     |               |                     |               |                     |                     |                           |
| b2      | 3186.19       | 0.114               | 3185.94       | 0.146               | 3186.07       | 0.119               | 3186.06       | 0.0858              | 3186.065            | 0.25                      |
| OHb     | 3282.02       | 0.198               | 3282.11       | 0.203               | 3282.07       | 0.172               | 3281.87       | 0.131               | 3282.0175           | 0.3                       |
| b2ON    | 3347.14       | 0.155               | 3347.38       | 0.354               | 3347.01       | 0.193               | 3346.94       | 0.233               | 3347.1175           | 0.6                       |
| xONn    | 3426.79       | 0.405               | 3426.48       | 0.367               | 3426.48       | 0.369               | 3426.83       | 0.457               | 3426.645            | 0.7                       |
| MMTN    |               |                     |               |                     |               |                     |               |                     |                     |                           |
| b2      | 3180.19       | 0.0654              | 3180.35       | 0.0764              | 3180.29       | 0.0874              | 3180.24       | 0.0559              | 3180.2675           | 0.16                      |
| OHb     | 3270.3        | 0.301               | 3270.98       | 0.273               | 3270.8        | 0.245               | 3269.04       | 0.0988              | 3270.28             | 0.695                     |
| b2ON    | 3344.07       | 0.165               | 3344.35       | 0.202               | 3344.26       | 0.162               | 3343.76       | 0.213               | 3344.11             | 0.55                      |
| xONn    | 3414.62       | 0.33                | 3414.59       | 0.417               | 3414.6        | 0.346               | 3416.18       | 0.903               | 3414.9975           | 1.49                      |
| MN5MMMM |               |                     |               |                     |               |                     |               |                     |                     |                           |
| b2      | 3176.32       | 0.183               | 3176.13       | 0.186               | 3176.19       | 0.164               | 3176.02       | 0.105               | 3176.165            | 0.31                      |
| OHb     | 3257.51       | 0.2                 | 3257.55       | 0.202               | 3257.54       | 0.179               | 3257.23       | 0.131               | 3257.4575           | 0.365                     |
| b2ON    | 3335.17       | 0.514               | 3334.74       | 0.464               | 3334.88       | 0.422               | 3332.04       | 0.35                | 3334.2075           | 2.14                      |
| xONn    | 3393.16       | 0.352               | 3393.05       | 0.401               | 3393.09       | 0.342               | 3393.09       | 0.643               | 3393.0975           | 0.81                      |

**Table S5:** Experimental IR intensities  $I$  and their uncertainties  $\Delta I$  for four integration methods as well as average intensities  $\bar{I}$  and their uncertainties  $\Delta\Delta I$  for b2, OHb, b2ON and xONn of amine-water complexes.

| Code    | I        |            | II       |            | III      |            | IV       |            | $\bar{I}$ | $\Delta\Delta I$ |
|---------|----------|------------|----------|------------|----------|------------|----------|------------|-----------|------------------|
|         | $I$      | $\Delta I$ |           |                  |
| MMEN    |          |            |          |            |          |            |          |            |           |                  |
| b2      | 2.14E-04 | 8.68E-06   | 2.23E-04 | 9.71E-06   | 2.21E-04 | 8.28E-06   | 2.59E-04 | 1.28E-05   | 2.29E-04  | 3.45E-05         |
| OHb     | 7.45E-04 | 2.12E-05   | 8.04E-04 | 2.06E-05   | 7.88E-04 | 1.84E-05   | 7.02E-04 | 1.44E-05   | 7.60E-04  | 7.10E-05         |
| b2ON    | 2.70E-04 | 1.70E-05   | 2.85E-04 | 1.68E-05   | 2.81E-04 | 1.49E-05   | 2.65E-04 | 1.41E-05   | 2.75E-04  | 2.85E-05         |
| xONn    | 2.52E-05 | 5.84E-06   | 1.78E-05 | 4.89E-06   | 1.78E-05 | 4.89E-06   | 3.87E-05 | 1.12E-05   | 2.49E-05  | 2.07E-05         |
| MN4     |          |            |          |            |          |            |          |            |           |                  |
| b2      | 2.26E-04 | 1.22E-05   | 2.10E-04 | 1.27E-05   | 2.14E-04 | 1.12E-05   | 2.65E-04 | 1.44E-05   | 2.29E-04  | 4.65E-05         |
| OHb     | 6.97E-04 | 1.97E-05   | 7.26E-04 | 1.91E-05   | 7.18E-04 | 1.70E-05   | 7.28E-04 | 1.57E-05   | 7.17E-04  | 4.25E-05         |
| b2ON    | 2.15E-04 | 1.36E-05   | 2.45E-04 | 1.38E-05   | 2.36E-04 | 1.21E-05   | 2.24E-04 | 1.41E-05   | 2.30E-04  | 3.35E-05         |
| xONn    | 4.50E-05 | 1.01E-05   | 4.90E-05 | 1.09E-05   | 4.79E-05 | 9.43E-06   | 2.70E-05 | 7.00E-06   | 4.22E-05  | 2.32E-05         |
| N555    |          |            |          |            |          |            |          |            |           |                  |
| b2      | 2.48E-04 | 9.43E-06   | 2.49E-04 | 1.27E-05   | 2.53E-04 | 8.57E-06   | 2.42E-04 | 1.13E-05   | 2.48E-04  | 1.90E-05         |
| OHb     | 4.94E-04 | 2.52E-05   | 4.84E-04 | 2.37E-05   | 4.87E-04 | 2.12E-05   | 4.54E-04 | 1.71E-05   | 4.80E-04  | 4.60E-05         |
| b2ON    | 1.74E-04 | 1.28E-05   | 1.73E-04 | 1.33E-05   | 1.73E-04 | 1.15E-05   | 1.69E-04 | 9.61E-06   | 1.72E-04  | 1.85E-05         |
| xONn    | 2.99E-05 | 8.02E-06   | 4.49E-05 | 9.01E-06   | 4.05E-05 | 7.77E-06   | 3.88E-05 | 8.12E-06   | 3.85E-05  | 1.80E-05         |
| MN5     |          |            |          |            |          |            |          |            |           |                  |
| b2      | 1.81E-04 | 1.07E-05   | 1.82E-04 | 1.26E-05   | 1.88E-04 | 1.03E-05   | 2.43E-04 | 1.20E-05   | 1.99E-04  | 4.45E-05         |
| OHb     | 5.72E-04 | 1.69E-05   | 5.82E-04 | 1.79E-05   | 5.78E-04 | 1.37E-05   | 5.83E-04 | 1.56E-05   | 5.79E-04  | 2.25E-05         |
| b2ON    | 1.16E-04 | 7.24E-06   | 1.18E-04 | 8.60E-06   | 1.18E-04 | 7.27E-06   | 1.38E-04 | 9.73E-06   | 1.22E-04  | 2.25E-05         |
| xONn    | 4.89E-05 | 9.34E-06   | 5.02E-05 | 9.72E-06   | 4.89E-05 | 9.00E-06   | 4.80E-05 | 1.07E-05   | 4.90E-05  | 1.50E-05         |
| MMIN    |          |            |          |            |          |            |          |            |           |                  |
| b2      | 5.76E-04 | 1.84E-05   | 6.06E-04 | 1.80E-05   | 5.98E-04 | 1.60E-05   | 5.79E-04 | 1.44E-05   | 5.90E-04  | 3.50E-05         |
| OHb     | 1.08E-03 | 2.40E-05   | 1.09E-03 | 2.28E-05   | 1.09E-03 | 2.04E-05   | 1.17E-03 | 2.33E-05   | 1.11E-03  | 7.35E-05         |
| b2ON    | 3.05E-04 | 1.29E-05   | 3.01E-04 | 1.34E-05   | 3.02E-04 | 1.17E-05   | 3.04E-04 | 1.13E-05   | 3.03E-04  | 1.85E-05         |
| xONn    | 6.56E-05 | 1.14E-05   | 9.70E-05 | 1.21E-05   | 8.79E-05 | 1.05E-05   | 5.27E-05 | 9.69E-06   | 7.58E-05  | 3.70E-05         |
| MMCN    |          |            |          |            |          |            |          |            |           |                  |
| b2      | 3.57E-04 | 1.28E-05   | 4.10E-04 | 1.45E-05   | 3.92E-04 | 1.14E-05   | 3.74E-04 | 9.81E-06   | 3.83E-04  | 4.35E-05         |
| OHb     | 6.92E-04 | 2.36E-05   | 7.65E-04 | 2.31E-05   | 7.44E-04 | 1.97E-05   | 6.43E-04 | 1.59E-05   | 7.11E-04  | 8.45E-05         |
| b2ON    | 2.58E-04 | 1.28E-05   | 2.85E-04 | 1.73E-05   | 2.88E-04 | 1.11E-05   | 3.06E-04 | 1.42E-05   | 2.84E-04  | 4.05E-05         |
| xONn    | 4.77E-05 | 7.83E-06   | 5.55E-05 | 7.84E-06   | 5.55E-05 | 7.84E-06   | 5.63E-05 | 8.10E-06   | 5.37E-05  | 1.40E-05         |
| MMTN    |          |            |          |            |          |            |          |            |           |                  |
| b2      | 6.10E-04 | 1.49E-05   | 6.40E-04 | 1.49E-05   | 6.59E-04 | 1.60E-05   | 6.07E-04 | 1.13E-05   | 6.29E-04  | 4.95E-05         |
| OHb     | 8.32E-04 | 2.53E-05   | 7.83E-04 | 2.38E-05   | 7.96E-04 | 2.13E-05   | 7.65E-04 | 1.73E-05   | 7.94E-04  | 6.25E-05         |
| b2ON    | 2.53E-04 | 1.42E-05   | 2.92E-04 | 1.49E-05   | 2.78E-04 | 1.24E-05   | 3.04E-04 | 1.56E-05   | 2.82E-04  | 4.95E-05         |
| xONn    | 5.40E-05 | 1.02E-05   | 5.18E-05 | 1.09E-05   | 5.26E-05 | 9.41E-06   | 6.53E-05 | 1.11E-05   | 5.59E-05  | 2.85E-05         |
| MN5MMMM |          |            |          |            |          |            |          |            |           |                  |
| b2      | 5.79E-04 | 1.96E-05   | 6.15E-04 | 1.92E-05   | 6.05E-04 | 1.71E-05   | 5.66E-04 | 1.30E-05   | 5.91E-04  | 4.25E-05         |
| OHb     | 5.72E-04 | 2.15E-05   | 6.14E-04 | 2.10E-05   | 6.03E-04 | 1.86E-05   | 5.30E-04 | 1.42E-05   | 5.80E-04  | 6.45E-05         |
| b2ON    | 2.41E-04 | 2.04E-05   | 2.91E-04 | 1.97E-05   | 2.77E-04 | 1.76E-05   | 2.02E-04 | 1.41E-05   | 2.53E-04  | 6.50E-05         |
| xONn    | 1.20E-04 | 1.28E-05   | 1.32E-04 | 1.31E-05   | 1.29E-04 | 1.14E-05   | 1.18E-04 | 1.41E-05   | 1.25E-04  | 2.35E-05         |



### 3 Harmonic modeling

#### 3.1 Details on harmonic calculations

The monomer structures of the ten tertiary amines MN4, MN5, MN5MMMM, N555, MMEN, MMIN, MMCN, MMTN, EEEN and IIIN were optimized by using three-body-inclusive D3-dispersion-corrected<sup>[4,5]</sup> B3LYP with the def2-TZVP basis set<sup>[6-8]</sup> (B3LYP/TZ) on ORCA 5.0.3<sup>[9-12]</sup> with the keywords ABC DEFGRID3 VERYTIGHTSCF VERYTIGHTOPT FREQ. Then, the water molecule was attached to the minimum structure of tertiary amine monomers using Chemcraft version 1.8 and the generated monohydrates were preoptimized on CREST<sup>[13,14]</sup>. After that, all the possible conformers were reoptimized using B3LYP-D3/def2-TZVP on ORCA 5.0.3 with the same keywords used for the monomers.

For 7 out of the 10 tertiary amines (MN4, MN5, MN5MMMM, N555, MMEN, MMTN and IIIN) one stable monomer conformation was identified, as for their heterodimers with water. The resulting optimized monomer and monohydrate structures of MN4, MN5, MN5MMMM, N555, MMEN, MMTN and IIIN using B3LYP-D3/def2-TZVP on ORCA 5.0.3 are provided here: dataset.

For N,N-dimethylisopropylamine (MMIN), there are two low-lying monomer structures: MMIN\_a and MMIN\_b, which are shown in Fig. S1. The zero point corrected energy difference  $\Delta E_0$  between them is 2.3 kJ/mol, with MMIN\_a being more stable. Their 1:1 amine water complexes are close in energy and have similar OH stretching fundamentals, ON stretching fundamentals and bending vibrations of water, all are described in Table S7. Similarly, there are two minimum monomer structures for N,N-dimethylcyclohexylamine (MMCN): MMCN\_a and MMCN\_b, which are described in Fig. S1. The zero point corrected energy difference  $\Delta E_0$  is 2.7 kJ/mol, with MMCN\_a being more stable. The zero point corrected energy difference  $\Delta E_0$  of their heterodimers is lowered to 1.3 kJ/mol and MMCN\_a+H<sub>2</sub>O is still the most stable structure, which is described in Table S8. For triethylamine (EEEN), there are three minimum structures for the monomer: EEEN1, EEEN2 and EEEN3. Their optimized structures are shown in Fig. 9 in the main text and their relative energy differences are described in Table S19. Their monohydrates (optimized at B3LYP-D3/def2-TZVP level) are shown in Fig. S14 and their relative energy differences are also described in Table S20. The optimized structures of MMIN, MMCN and EEEN monomers and monohydrates are accessible here: dataset.

To build the mixed trimer structures, a second water molecule was attached to the global minimum structure of the heterodimers using Chemcraft version 1.8, preoptimized using CREST and reoptimized using the same functional and basis set as for monomers and mixed dimers on ORCA 5.0.3.

To build the heterodimers of tertiary amines with methanol, the optimized methanol molecule was attached to the optimized structure of amine monomer, preoptimized using CREST and reoptimized using B3LYP-D3/def2-TZVP on ORCA 5.0.3. The optimized mixed dimer structures are accessible in here: dataset and the harmonic wavenumbers for the OH stretching fundamental OHb and the ON stretching vibrations are described in Table S25.

Relevant harmonic wavenumbers  $\omega/\text{cm}^{-1}$  of the 1:1 complexes of 10 tertiary amines with H<sub>2</sub>O are shown in Table S6.

**Table S6:** Harmonic DFT predictions on B3LYP/def2-TZVP level for the ON stretching fundamental ON, its overtone ON2, the bending mode of water b, the bending overtone b2, the OH stretching fundamental OHb, and the combination bands b2ON, b2ON2 and OHbON for 10 amine monohydrates.

| Code    | ON  | ON2 | b    | b2   | OHb  | b2ON | b2ON2 | OHbON |
|---------|-----|-----|------|------|------|------|-------|-------|
| MMEN    | 166 | 332 | 1658 | 3316 | 3385 | 3482 | 3648  | 3551  |
| MN4     | 162 | 324 | 1656 | 3312 | 3384 | 3474 | 3636  | 3546  |
| MMIN_a  | 165 | 330 | 1660 | 3320 | 3365 | 3485 | 3650  | 3530  |
| MMIN_b  | 164 | 328 | 1659 | 3318 | 3367 | 3482 | 3646  | 3531  |
| MN5     | 153 | 306 | 1657 | 3314 | 3370 | 3467 | 3620  | 3523  |
| MMTN    | 167 | 334 | 1663 | 3326 | 3342 | 3493 | 3660  | 3509  |
| N555    | 166 | 332 | 1659 | 3318 | 3366 | 3484 | 3650  | 3532  |
| MMCN_a  | 164 | 328 | 1661 | 3322 | 3366 | 3486 | 3652  | 3530  |
| MMCN_b  | 165 | 330 | 1661 | 3322 | 3360 | 3487 | 3652  | 3525  |
| MN5MMMM | 161 | 322 | 1662 | 3324 | 3333 | 3485 | 3646  | 3494  |
| EEEN1   | 157 | 313 | 1660 | 3320 | 3377 | 3477 | 3633  | 3533  |
| EEEN2   | 159 | 318 | 1665 | 3330 | 3351 | 3489 | 3648  | 3510  |
| EEEN3   | 163 | 326 | 1663 | 3326 | 3346 | 3489 | 3653  | 3509  |
| IIIN    | 119 | 238 | 1658 | 3316 | 3488 | 3435 | 3554  | 3607  |

**Table S7:** Relative electronic  $\Delta E_{el}$  and zero point corrected  $\Delta E_0$  energy of two different monomers of dimethylisopropylamine (MMIN): MMIN\_a and MMIN\_b and two different heterodimer with water: MMIN\_a+H<sub>2</sub>O and MMIN\_b+H<sub>2</sub>O using B3LYP-D3/def2-TZVP. These conformer structures are shown in Fig. S1.

| Conformer | $\Delta E_{el}/(\text{kJ/mol})$ | $\Delta E_0/(\text{kJ/mol})$ | Conformer               | $\Delta E_{el}/(\text{kJ/mol})$ | $\Delta E_0/(\text{kJ/mol})$ |
|-----------|---------------------------------|------------------------------|-------------------------|---------------------------------|------------------------------|
| MMIN_a    | 0                               | 0                            | MMIN_a+H <sub>2</sub> O | 0                               | 0                            |
| MMIN_b    | 1.6                             | 2.3                          | MMIN_b+H <sub>2</sub> O | 0.5                             | 1.2                          |

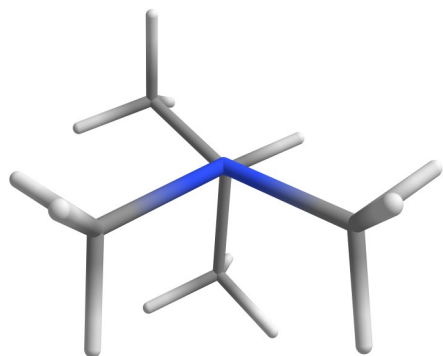

MMIN\_a

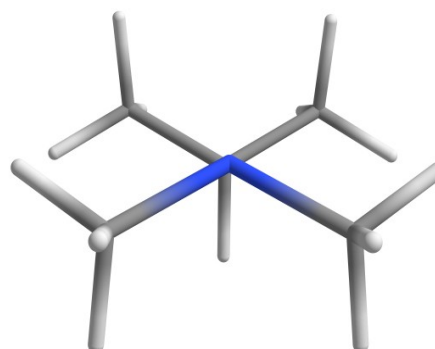

MMIN\_b

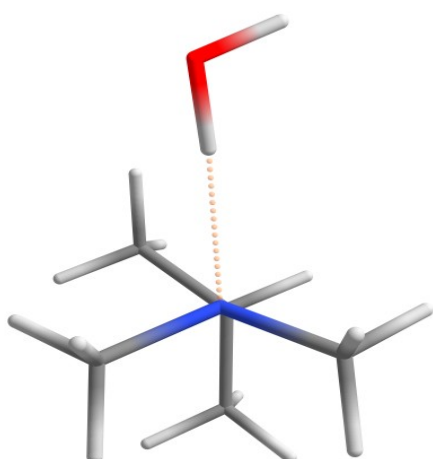MMIN\_a +H<sub>2</sub>O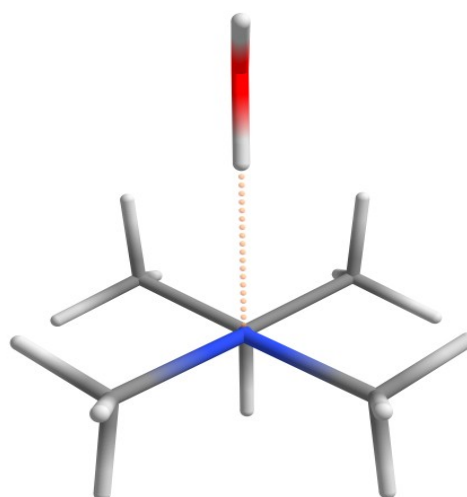MMIN\_b +H<sub>2</sub>O

**Figure S1:** Two different conformers of N,N-dimethylisopropylamine (MMIN) monomer (MMIN\_a and MMIN\_b) and its monohydrate (MMIN\_a+H<sub>2</sub>O and MMIN\_b+H<sub>2</sub>O). The global minimum structure is MMIN\_a for the monomer and (less pronounced) MMIN\_a+H<sub>2</sub>O for the monohydrate.

**Table S8:** Relative electronic  $\Delta E_{el}$  and zero point corrected  $\Delta E_0$  energy of two different monomers of N,N-dimethylcyclohexylamine (MMCN): MMCN\_a and MMCN\_b and two different heterodimer with water: MMCN\_a+H<sub>2</sub>O and MMCN\_b+H<sub>2</sub>O using B3LYP-D3/def2-TZVP. These conformer structures are shown in Fig. S2.

| Conformer | $\Delta E_{el}/(\text{kJ/mol})$ | $\Delta E_0/(\text{kJ/mol})$ | Conformer               | $\Delta E_{el}/(\text{kJ/mol})$ | $\Delta E_0/(\text{kJ/mol})$ |
|-----------|---------------------------------|------------------------------|-------------------------|---------------------------------|------------------------------|
| MMCN_a    | 0                               | 0                            | MMIN_a+H <sub>2</sub> O | 0                               | 0                            |
| MMCN_b    | 2.3                             | 2.7                          | MMIN_b+H <sub>2</sub> O | 1.2                             | 1.3                          |

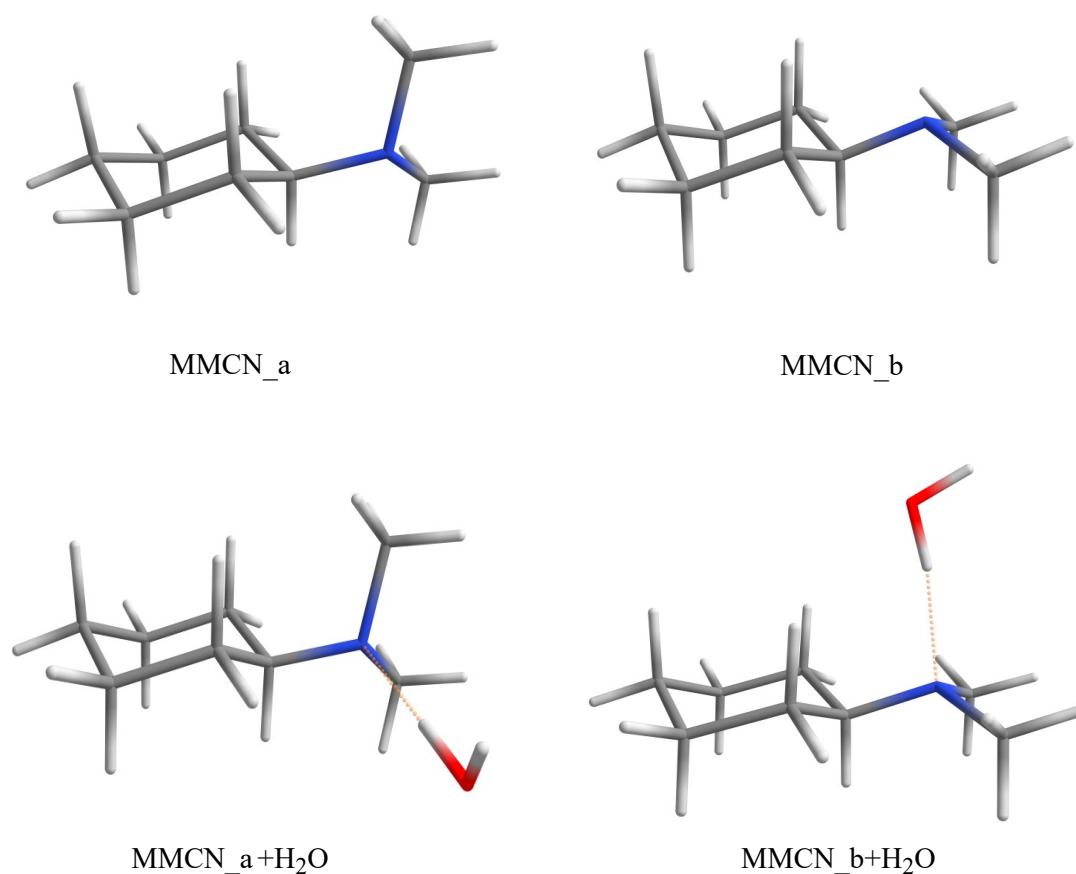

**Figure S2:** Two different conformers of N,N-dimethylcyclohexylamine (MMCN) monomer (MMCN\_a and MMCN\_b) and its monohydrate (MMCN\_a+H<sub>2</sub>O and MMCN\_b+H<sub>2</sub>O). The global minimum structure is MMCN\_a for the monomer and (less pronounced) MMCN\_a+H<sub>2</sub>O for the monohydrate.

## 4 Four anharmonic coupling models

Four different coupling models A, B, C and C' are shown in Figs. S3, S4, S5 and S6 to explain anharmonic resonance scenarios for a bright OH stretching vibration OHb sharing its intensity with the bending overtone b2 and the combination bands b2ON, b2ON2 and OHbON in tertiary amines monohydrates. Shown are progressions of ON stretching levels building on OHb (left, black) and on b2 (right, red). The resulting coupling matrices ( $2 \times 2$  matrix for model A,  $3 \times 3$  matrix for model B,  $4 \times 4$  matrix for model C and C') are derived in ESI part 3. The obtained coupling constants  $W$  and the deperturbed positions of different resonance partners are listed in Table S9, S10, S11, S12.

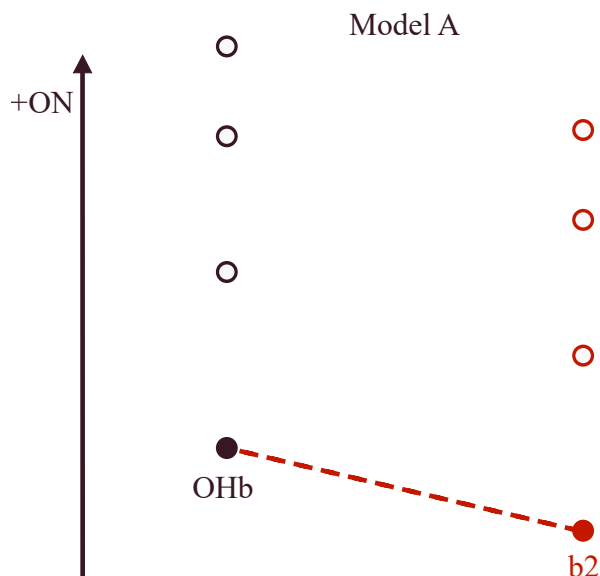

Figure S3: Coupling model A

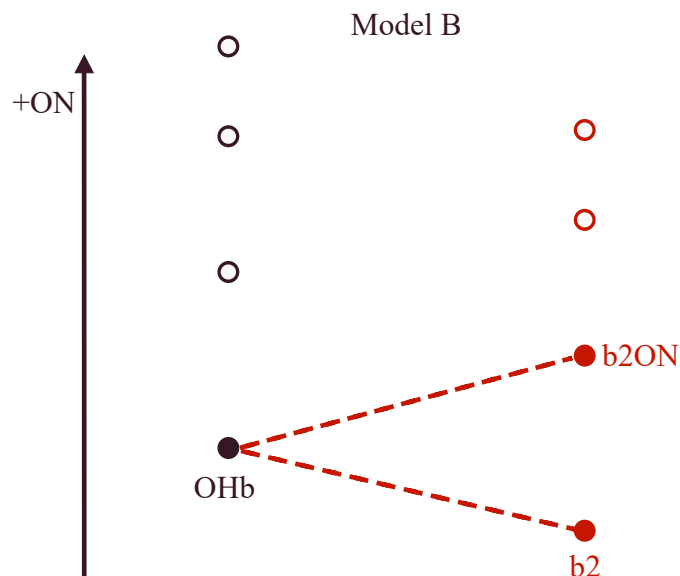

Figure S4: Coupling model B

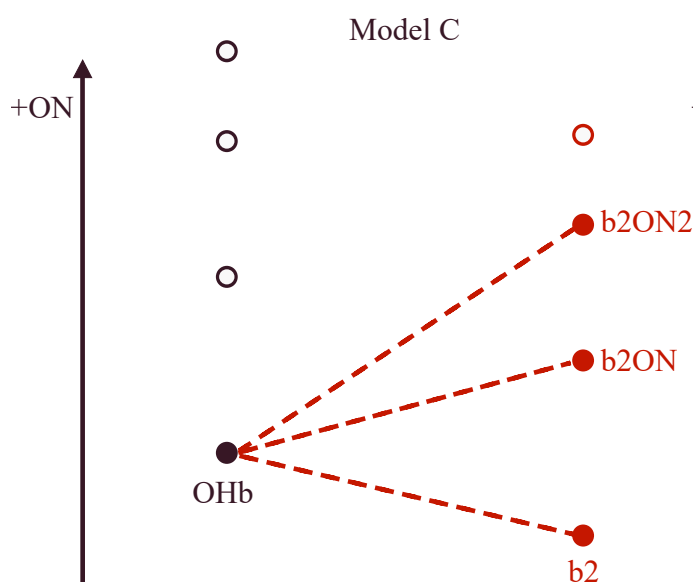

Figure S5: Coupling model C

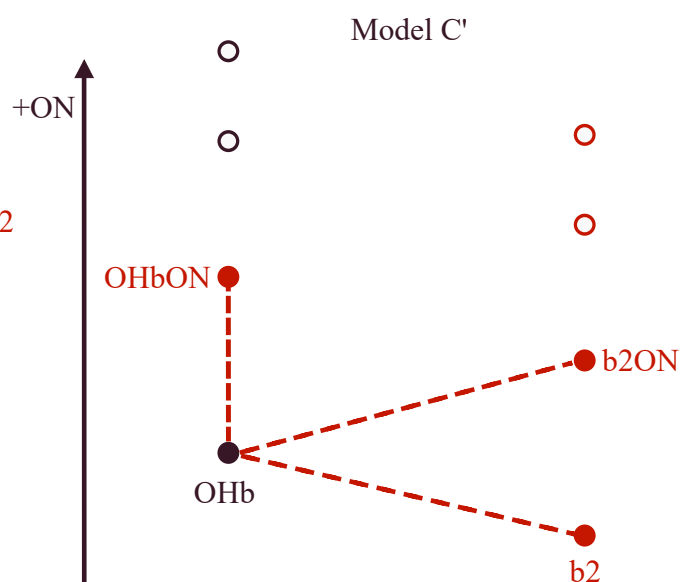

Figure S6: Coupling model C'

**Table S9:** Coupling constants  $W_2$  with their uncertainties  $\Delta W_2$  and deperturbed positions for b2 and OHb with associated uncertainties  $\Delta b2$  and  $\Delta OHb$  derived from coupling model A

| Code    | b2      | $\Delta b2$ | OHb     | $\Delta OHb$ | $W_2$ | $\Delta W_2$ |
|---------|---------|-------------|---------|--------------|-------|--------------|
| MMEN    | 3217.48 | 3.54        | 3274.86 | 3.54         | 46.48 | 2.21         |
| MN4     | 3217.53 | 4.39        | 3272.48 | 4.34         | 46.43 | 2.72         |
| MMIN    | 3221.66 | 2.02        | 3250.03 | 2.03         | 46.72 | 0.66         |
| MN5     | 3214.80 | 4.55        | 3263.30 | 4.51         | 43.80 | 2.71         |
| MMTN    | 3219.89 | 2.46        | 3228.92 | 2.45         | 43.87 | 0.38         |
| N555    | 3229.34 | 2.94        | 3260.62 | 2.96         | 49.19 | 0.99         |
| MMCN    | 3220.42 | 3.68        | 3247.66 | 3.69         | 45.84 | 1.11         |
| MN5MMMM | 3217.79 | 2.72        | 3215.83 | 2.72         | 40.54 | 0.28         |

**Table S10:** Coupling constants  $W_2$ ,  $W_3$  with their uncertainties  $\Delta W_2$ ,  $\Delta W_3$  and deperturbed positions for b2, OHb and b2ON with associated uncertainties  $\Delta b2$ ,  $\Delta OHb$  and  $\Delta b2ON$  derived from coupling model B

| Code    | b2      | $\Delta b2$ | OHb     | $\Delta OHb$ | b2ON    | $\Delta b2ON$ | $W_2$ | $\Delta W_2$ | $W_3$ | $\Delta W_3$ |
|---------|---------|-------------|---------|--------------|---------|---------------|-------|--------------|-------|--------------|
| MMEN    | 3213.64 | 3.07        | 3291.31 | 3.17         | 3338.99 | 1.37          | 46.07 | 2.50         | 23.72 | 0.96         |
| MN4     | 3214.04 | 4.02        | 3286.88 | 4.33         | 3336.68 | 1.39          | 46.13 | 3.06         | 21.99 | 1.05         |
| MMIN    | 3218.84 | 1.86        | 3264.54 | 1.77         | 3336.33 | 0.85          | 48.00 | 0.86         | 27.67 | 0.88         |
| MN5     | 3212.64 | 4.34        | 3273.80 | 4.70         | 3333.93 | 1.39          | 43.99 | 2.97         | 20.99 | 1.45         |
| MMTN    | 3217.05 | 2.39        | 3247.43 | 3.50         | 3328.79 | 2.49          | 46.44 | 0.74         | 35.25 | 2.20         |
| N555    | 3225.15 | 2.59        | 3277.62 | 2.61         | 3338.38 | 1.44          | 50.31 | 1.33         | 26.11 | 1.18         |
| MMCN    | 3216.55 | 3.30        | 3267.74 | 3.64         | 3330.91 | 2.28          | 47.60 | 1.63         | 31.57 | 1.69         |
| MN5MMMM | 3214.92 | 2.68        | 3236.10 | 4.90         | 3316.81 | 4.21          | 43.86 | 0.88         | 37.37 | 3.52         |

**Table S11:** Deperturbed positions for b2, OHb, b2ON and xONn with associated uncertainties  $\Delta b2$ ,  $\Delta OHb$ ,  $\Delta b2ON$  and  $\Delta xONn$  derived from coupling model C

| Code    | b2      | $\Delta b2$ | OHb     | $\Delta OHb$ | b2ON    | $\Delta b2ON$ | xONn    | $\Delta xONn$ |
|---------|---------|-------------|---------|--------------|---------|---------------|---------|---------------|
| MMEN    | 3213.46 | 3.05        | 3294.29 | 3.76         | 3338.88 | 1.38          | 3443.75 | 2.79          |
| MN4     | 3213.72 | 3.99        | 3292.00 | 5.07         | 3336.52 | 1.40          | 3436.74 | 2.60          |
| MMIN    | 3218.44 | 1.84        | 3270.31 | 3.15         | 3336.03 | 0.89          | 3425.52 | 2.74          |
| MN5     | 3212.18 | 4.29        | 3281.48 | 5.28         | 3333.68 | 1.42          | 3422.52 | 2.50          |
| MMTN    | 3216.70 | 2.38        | 3252.45 | 4.12         | 3328.31 | 2.53          | 3409.02 | 2.46          |
| N555    | 3224.68 | 2.55        | 3283.99 | 3.73         | 3338.10 | 1.46          | 3434.94 | 3.00          |
| MMCN    | 3216.15 | 3.26        | 3273.45 | 3.76         | 3330.52 | 2.31          | 3421.73 | 1.45          |
| MN5MMMM | 3214.02 | 2.64        | 3248.25 | 4.69         | 3315.20 | 4.30          | 3383.47 | 2.04          |

**Table S12:** Coupling constants  $W_2$ ,  $W_3$  and  $W_4$  and their uncertainties  $\Delta W_2$ ,  $\Delta W_3$  and  $\Delta W_4$  derived from coupling model C

| Code    | $W_2$ | $\Delta W_2$ | $W_3$ | $\Delta W_3$ | $W_4$ | $\Delta W_4$ |
|---------|-------|--------------|-------|--------------|-------|--------------|
| MMEN    | 46.22 | 2.53         | 24.07 | 1.01         | 17.14 | 8.55         |
| MN4     | 46.40 | 3.11         | 22.58 | 1.09         | 23.66 | 7.74         |
| MMIN    | 48.48 | 0.93         | 28.69 | 1.05         | 25.58 | 7.17         |
| MN5     | 44.45 | 3.06         | 22.03 | 1.49         | 30.12 | 4.58         |
| MMTN    | 46.98 | 0.81         | 36.52 | 2.26         | 22.61 | 6.76         |
| N555    | 50.82 | 1.41         | 27.01 | 1.27         | 26.71 | 7.08         |
| MMCN    | 48.07 | 1.70         | 32.62 | 1.72         | 25.13 | 3.34         |
| MN5MMMM | 45.37 | 0.94         | 41.09 | 3.38         | 32.60 | 3.45         |

## 5 Isotope effect in the monohydrates of tertiary amines

When normal water HOH is replaced by singly deuterated water DOH, there is only one signal for the hydrogen-bonded OH stretching fundamental in the monohydrate because the resonance partners are removed. To estimate the deperturbed position of OHb in the 1:1 complex of tertiary amine with normal water HOH, the calculated harmonic wavenumber difference between HOH and DOH is subtracted from the experimental OH stretching vibration in the heterodimer with DOH, as shown in Figs. 1 and 2 from the main text and Fig. S7, S8, S9 and S10. The experimental and harmonic wavenumbers are listed in Table S13 and S14.

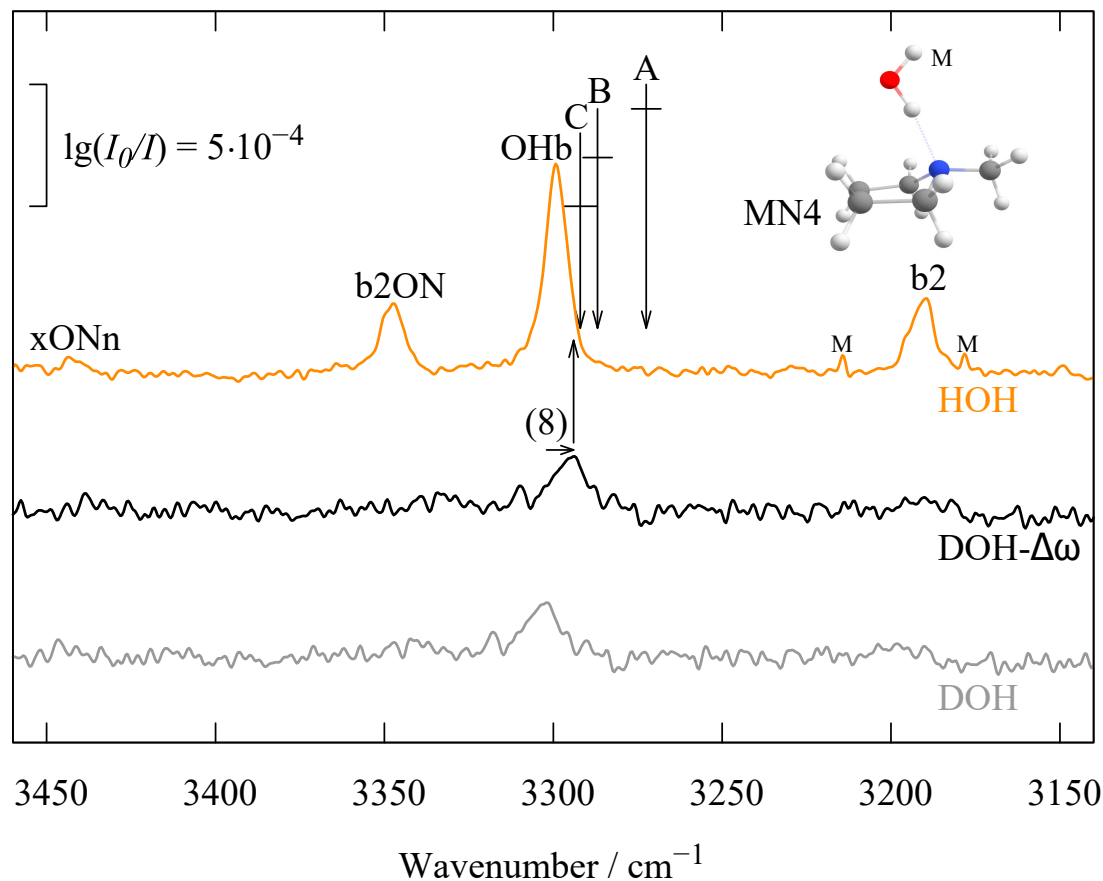

**Figure S7:** Analogous to Fig. 1 and 2 from the main text. The good agreement of the 4-transition intensity centroid of the OH stretching spectrum of the N-methylpyrrolidine- $\text{H}_2\text{O}$  complex (upper trace, arrow C) with the OH stretching spectrum of the corresponding HOD complex (lower trace) after harmonic correction for kinematic effects ( $\Delta\omega = 8 \text{ cm}^{-1}$ , middle trace) suggests that all four 1:1 complex transitions in the upper trace are likely to derive their intensity from the OH stretching mode. Arrows mark centroid positions and are labelled according to models A, B, C.

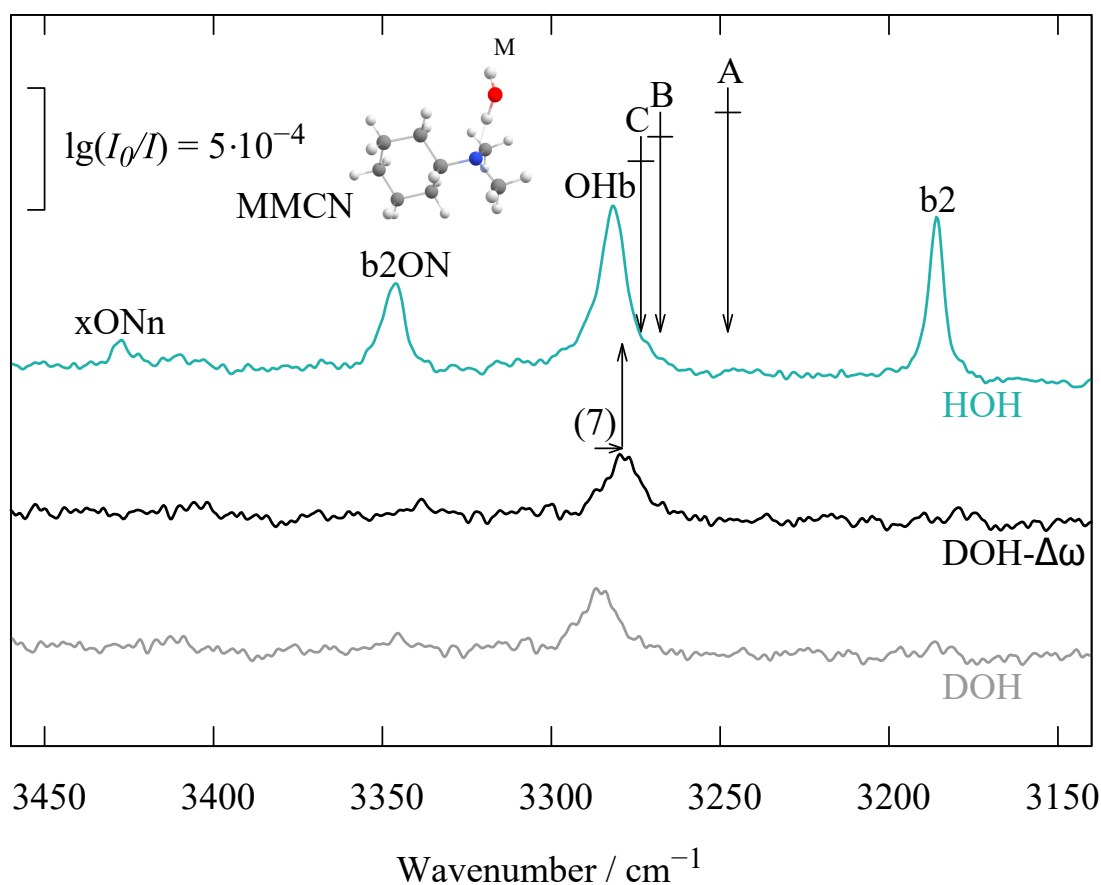

**Figure S8:** Analogous to Fig. 1 and 2 from the main text. The good agreement of the 4-transition intensity centroid of the OH stretching spectrum of the N,N-dimethylcyclohexylamine-H<sub>2</sub>O complex (upper trace, arrow C) with the OH stretching spectrum of the corresponding HOD complex (lower trace) after harmonic correction for kinematic effects ( $\Delta\omega = 7 \text{ cm}^{-1}$ , middle trace) suggests that all four 1:1 complex transitions in the upper trace are likely to derive their intensity from the OH stretching mode. Arrows mark centroid positions and are labelled according to models A, B, C.

**Table S13:** Experimental wavenumbers  $\tilde{\nu}$  of OHb for tertiary amines with DOH and the harmonic wavenumbers  $\omega$  and the harmonic wavenumber differences  $\Delta\omega$  between DOH and HOH for five tertiary amines: MN4, MN5, MMCN, MMTN and MN5MMMM. The experimental deperturbed position of OHb for HOH is calculated by subtracting the harmonic wavenumber difference  $\Delta\omega$  from the experimental wavenumber  $\tilde{\nu}(\text{DOH})$ . See Figs. 1 and 2 from the main text and Figs. S7, S8 and S9 from ESI.

| Code    | $\tilde{\nu}/\text{cm}^{-1}$ | $\omega/\text{cm}^{-1}$ |      | $\Delta\omega$ | $\tilde{\nu}(\text{DOH})-\Delta\omega$ |
|---------|------------------------------|-------------------------|------|----------------|----------------------------------------|
|         | DOH                          | HOH                     | DOH  |                |                                        |
| MN4     | 3302                         | 3384                    | 3392 | 8              | 3294                                   |
| MN5     | 3294                         | 3370                    | 3378 | 8              | 3286                                   |
| MMCN    | 3286                         | 3366                    | 3373 | 7              | 3279                                   |
| MMTN    | 3269                         | 3342                    | 3351 | 9              | 3260                                   |
| MN5MMMM | 3256                         | 3333                    | 3341 | 8              | 3248                                   |

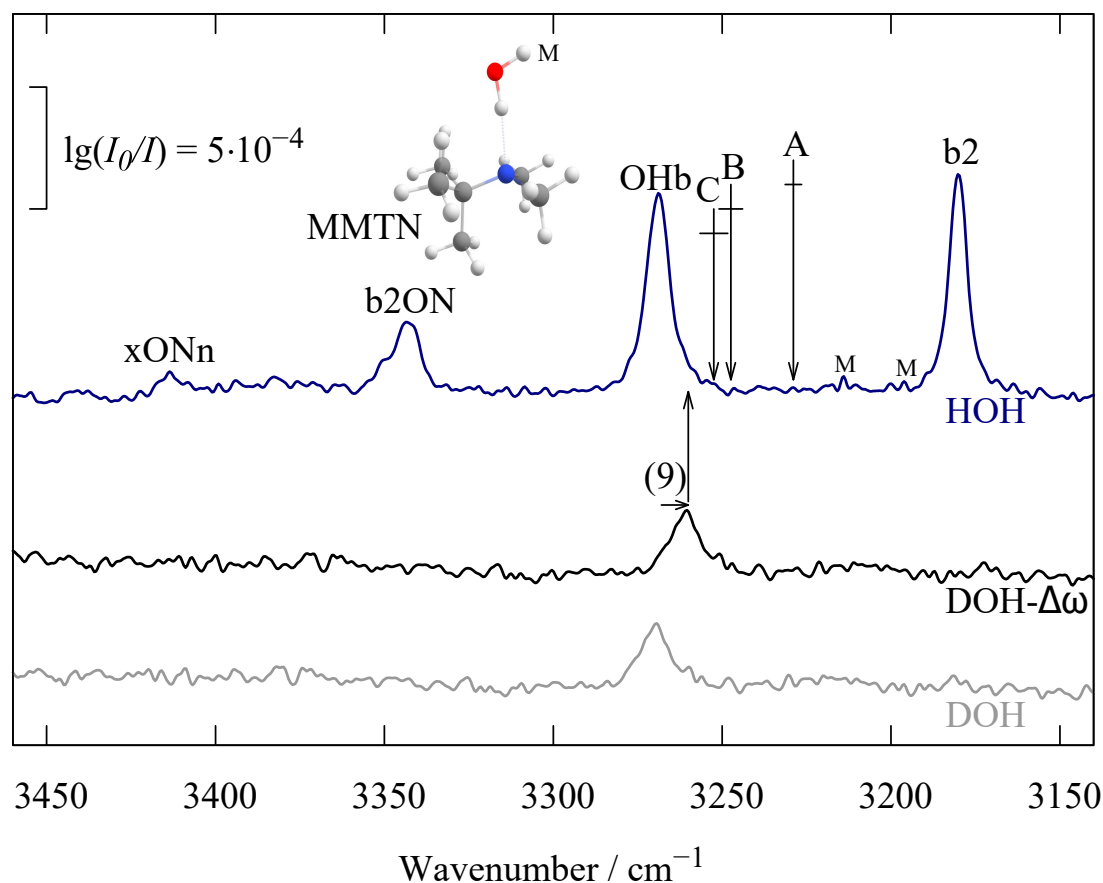

**Figure S9:** Analogous to Fig. 1 and 2 from the main text. The good agreement of the 4-transition intensity centroid of the OH stretching spectrum of the *tert*-butyldimethylamine-H<sub>2</sub>O complex (upper trace, arrow C) with the OH stretching spectrum of the corresponding HOD complex (lower trace) after harmonic correction for kinematic effects ( $\Delta\omega = 9\text{ cm}^{-1}$ , middle trace) suggests that all four 1:1 complex transitions in the upper trace are likely to derive their intensity from the OH stretching mode. Arrows mark centroid positions and are labelled according to models A, B, C.

**Table S14:** Raw and deperturbed wavenumbers (in  $\text{cm}^{-1}$ ) of OHb stretching fundamental for the heterodimers of five tertiary amines: MN4, MN5, MMCN, MMTN and MN5MMMM. The raw experimental wavenumbers  $\tilde{\nu}(\text{raw})$  with HOH and DOH are listed. The deperturbed positions of OHb centroid A, centroid B and centroid C are calculated by using coupling models A, B, C which are shown in detail in Tables S9, S10 and S11. The experimental deperturbed position for HOH, which is calculated by subtracting the harmonic wavenumber difference  $\Delta\omega$  between DOH and HOH from the experimental wavenumber  $\tilde{\nu}(\text{DOH})$ , is shown to compare with centroid A, B and C, and also calculated the difference from centroid C in the last column. See Fig. 3 from the main document.

| Code    | HOH                       |            |            | DOH        | $\tilde{\nu}(\text{DOH})-\Delta\omega$ | $(\tilde{\nu}(\text{DOH})-\Delta\omega)$ -centroid C |   |
|---------|---------------------------|------------|------------|------------|----------------------------------------|------------------------------------------------------|---|
|         | $\tilde{\nu}(\text{raw})$ | centroid A | centroid B | centroid C |                                        |                                                      |   |
| MN4     | 3299                      | 3273       | 3287       | 3292       | 3302                                   | 3294                                                 | 2 |
| MN5     | 3289                      | 3264       | 3274       | 3282       | 3294                                   | 3286                                                 | 5 |
| MMCN    | 3282                      | 3248       | 3268       | 3273       | 3286                                   | 3279                                                 | 6 |
| MMTN    | 3269                      | 3235       | 3247       | 3252       | 3269                                   | 3260                                                 | 8 |
| MN5MMMM | 3257                      | 3219       | 3236       | 3248       | 3256                                   | 3248                                                 | 0 |



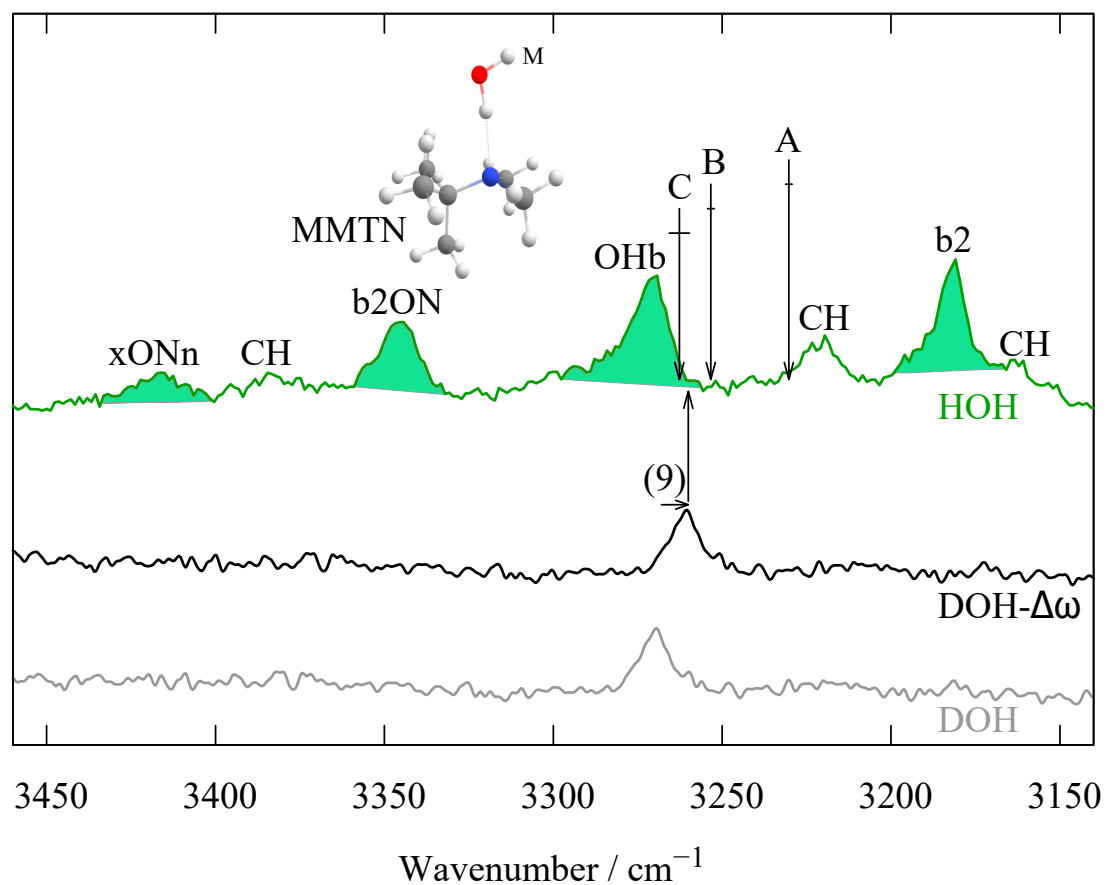

**Figure S10:** Same as Fig. S9, but with the FTIR spectrum replaced by the Raman spectrum of MMTN with HOH, also showing the same good agreement for arrow C with the OH stretching spectrum of the corresponding HOD complex. Arrows mark centroid positions and are labelled according to models A, B, C. The arrow positions are  $3230\text{ cm}^{-1}$  for model A,  $3253\text{ cm}^{-1}$  for B and  $3263\text{ cm}^{-1}$  for C. The shaded areas in the upper Raman spectrum are used to calculate the centroid C.

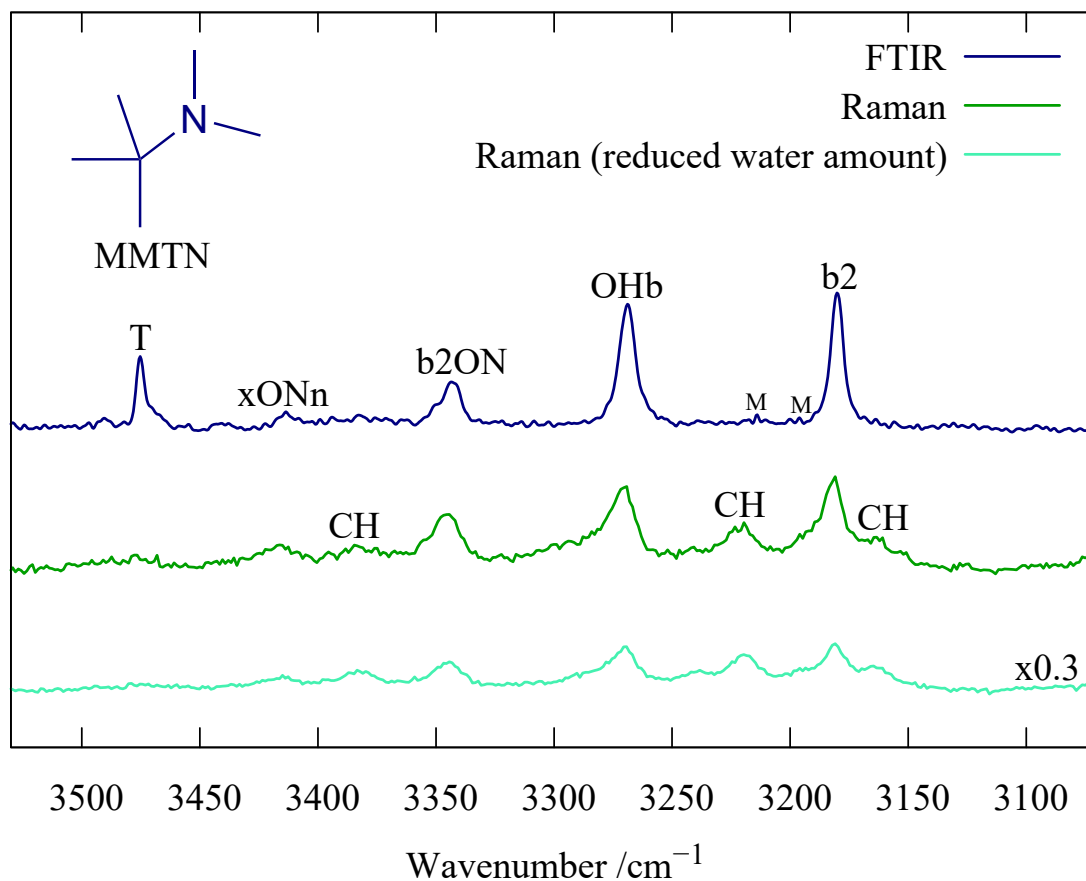

**Figure S11:** Analogous to Fig. 4 from the main text. Demonstration of wave function mixing of the OHb state in the MMTN monohydrate by observing largely the same relative intensity pattern in IR (top) and Raman (middle) spectroscopy, apart from CH combination bands in the Raman spectrum which persist for reduced water amount (bottom trace, multiplied by 0.3 because the amine concentration was higher).

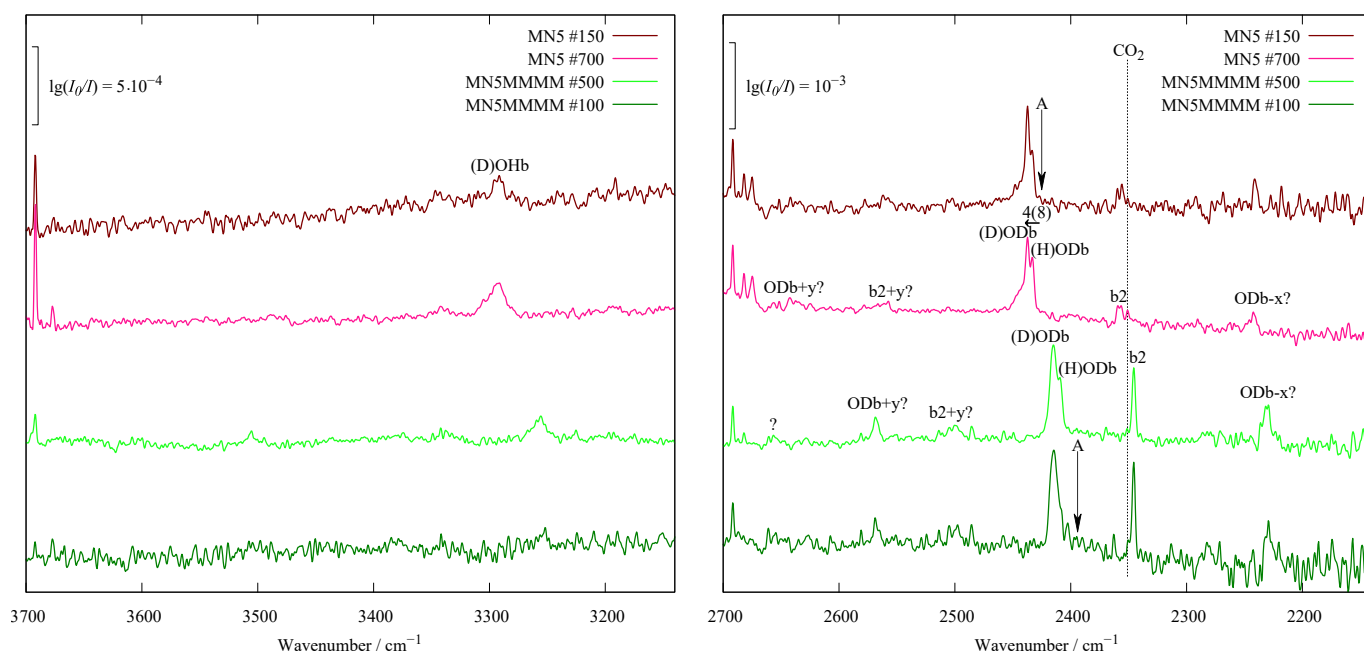

**Figure S12:** The spectra for isotope substitution of water with 1-methylpiperidine (MN5) and 1,2,2,6,6-pentamethylpiperidine (MN5MMMM). The concentration of  $D_2O$  is dropping in favour of less D-rich isotopologs. In the early 150 scans of MN5 (top spectrum) and the early 100 scans of MN5MMMM (bottom spectrum),  $D_2O$  dominates and a significant (D)ODb peak can be seen clearly. In the later 700 scans of MN5 and 500 scans of MN5MMMM (central spectra), the concentrations of DOH and HOD are increasing, as evidenced by (D)OHb and the (D)ODb/(H)ODb doublet. The black arrow A is the deperturbed position of (D)ODb from the Fermi resonance analysis of (D)ODb with b2. Combination bands of ODb and b2 with dimer stretching or methyl torsion (predicted around  $150\text{-}250\text{ cm}^{-1}$ ) may explain some of the weak features in the OD stretching range (right panel).

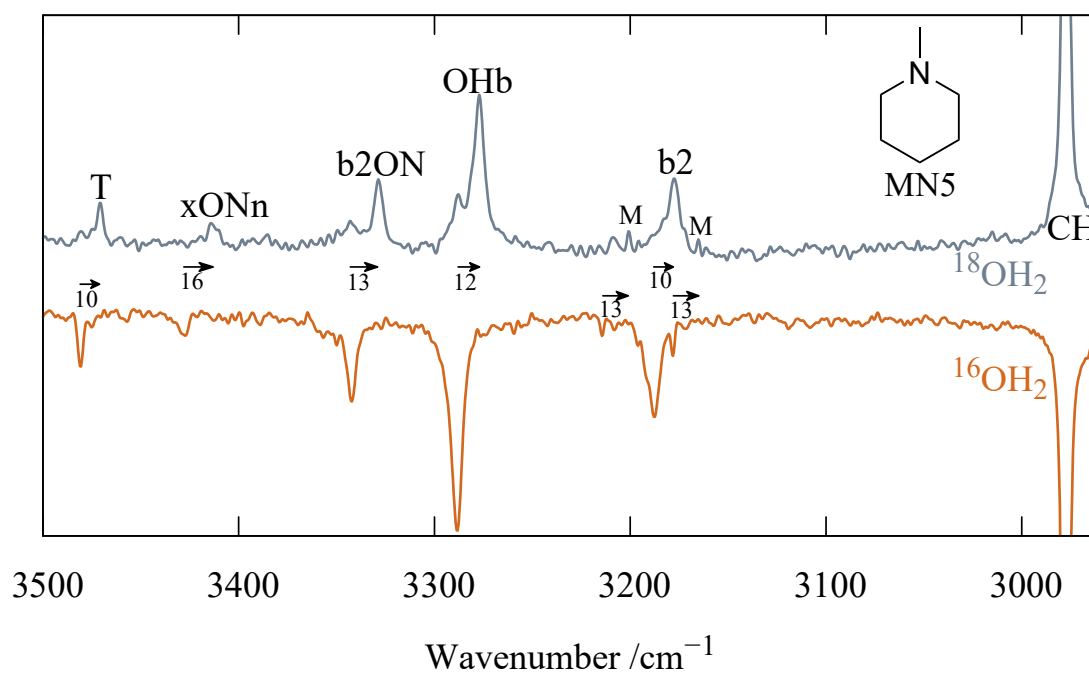

**Figure S13:** Same as Fig. 5 from the main document. Comparison of the OH stretching spectrum of MN5 with  $^{16}OH_2$  (bottom, inverted) to the same spectrum enriched in  $^{18}OH_2$ . The 16-18-isotope shifts in  $\text{cm}^{-1}$  are clarified by arrows.

**Table S15:** Experimental wavenumbers  $\tilde{\nu}$  of b2, OHb, b2ON and xONn for 1:1 complex of tertiary amines with  $^{16}\text{OH}_2$  and  $^{18}\text{OH}_2$  and M for water monomer and T for dihydrate. The downshift  $\Delta\tilde{\nu}$  for the isotope effect between  $^{16}\text{O}$  and  $^{18}\text{O}$  is calculated. See Fig. 5 in the main text and Fig. S13 in ESI.

| Code | $\tilde{\nu}/\text{cm}^{-1}$ |                    | $\Delta\tilde{\nu}/\text{cm}^{-1}$ |
|------|------------------------------|--------------------|------------------------------------|
|      | $^{16}\text{OH}_2$           | $^{18}\text{OH}_2$ |                                    |
| N555 |                              |                    |                                    |
| b2   | 3193                         | 3183               | 10                                 |
| OHb  | 3297                         | 3286               | 11                                 |
| b2ON | 3351                         | 3336               | 15                                 |
| xONn | 3441                         | 3424               | 17                                 |
| T    | 3475                         | 3465               | 10                                 |
| M1   | 3214                         | 3201               | 13                                 |
| M2   | 3178                         | 3165               | 13                                 |
| MN5  |                              |                    |                                    |
| b2   | 3189                         | 3179               | 10                                 |
| OHb  | 3289                         | 3277               | 12                                 |
| b2ON | 3342                         | 3329               | 13                                 |
| xONn | 3429                         | 3413               | 16                                 |
| T    | 3481                         | 3471               | 10                                 |
| M1   | 3214                         | 3201               | 13                                 |
| M2   | 3178                         | 3165               | 13                                 |

## 6 Perturbed and deperturbed ON stretching vibration in models C and C'

**Table S16:** Raw and deperturbed wavenumbers (in  $\text{cm}^{-1}$ ) by applying model C for ON stretching vibration and its overtone 2ON of 8 tertiary amines: MMEN, MN4, MMIN, MN5, MMTN, N555, MMCN and MN5MMMM with water. The ON stretching fundamental is obtained by b2ON-b2 and its overtone 2ON is calculated as b2ON2(xONn)-b2 with their uncertainties  $\Delta\text{ON}$  and  $\Delta 2\text{ON}$ . The mass of amines in atomic mass units  $u$  is also shown. See Fig. 7 in the main text.

| Code    | Mass/ $u$ | $\tilde{\nu}(\text{raw})$ |                   |               |                     | Deperturbed by model C |                   |               |                     |
|---------|-----------|---------------------------|-------------------|---------------|---------------------|------------------------|-------------------|---------------|---------------------|
|         |           | ON(b2ON-b2)               | $\Delta\text{ON}$ | 2ON(b2ON2-b2) | $\Delta 2\text{ON}$ | ON(b2ON-b2)            | $\Delta\text{ON}$ | 2ON(b2ON2-b2) | $\Delta 2\text{ON}$ |
| MMEN    | 73        | 160.2                     | 0.9               | 255.1         | 2.4                 | 125.4                  | 4.5               | 230.3         | 5.9                 |
| MN4     | 85        | 156.8                     | 1.3               | 250.6         | 1.9                 | 122.8                  | 5.4               | 223.0         | 6.6                 |
| MMIN    | 87        | 161.0                     | 0.6               | 243.6         | 1.7                 | 117.6                  | 2.8               | 207.1         | 4.6                 |
| MN5     | 99        | 153.6                     | 1.4               | 240.8         | 2.4                 | 121.5                  | 5.8               | 210.3         | 6.8                 |
| MMTN    | 101       | 164.2                     | 1.0               | 233.0         | 1.7                 | 111.6                  | 4.9               | 192.3         | 4.9                 |
| N555    | 111       | 157.9                     | 0.9               | 247.3         | 2.0                 | 113.4                  | 4.1               | 210.2         | 5.6                 |
| MMCN    | 127       | 161.1                     | 0.9               | 240.6         | 1.0                 | 114.4                  | 5.6               | 205.6         | 4.8                 |
| MN5MMMM | 155       | 158.0                     | 2.5               | 216.9         | 1.1                 | 101.2                  | 6.9               | 169.5         | 4.7                 |

**Table S17:** Deperturbed wavenumbers (in  $\text{cm}^{-1}$ ) by applying model C for ON stretching fundamental  $\nu_1$  and its overtone (2ON)  $2\nu_1$  for 8 tertiary amines: MMEN, MN4, MMIN, MN5, MMTN, N555, MMCN and MN5MMMM with water. The anharmonicity constants  $\omega_e x_e$  and  $\omega_e$  are calculated by assuming a Morse oscillator. All values in  $\text{cm}^{-1}$ .

| Code    | $\nu_1$ | $2\nu_1$ | $\omega_e x_e$ | $\omega_e$ |
|---------|---------|----------|----------------|------------|
| MMEN    | 125.4   | 230.3    | 10.3           | 145.9      |
| MN4     | 122.8   | 223.0    | 11.3           | 145.4      |
| MMIN    | 117.6   | 207.1    | 14.1           | 145.8      |
| MN5     | 121.5   | 210.3    | 16.3           | 154.2      |
| MMTN    | 111.6   | 192.3    | 15.5           | 142.5      |
| N555    | 113.4   | 210.2    | 8.3            | 130.0      |
| MMCN    | 114.4   | 205.6    | 11.6           | 137.6      |
| MN5MMMM | 101.2   | 169.5    | 16.4           | 134.1      |

**Table S18:** Raw and deperturbed wavenumbers (in  $\text{cm}^{-1}$ ) by applying model C' for ON stretching vibration on top of the b2 excitation and ON on top of OHb excitation for 8 tertiary amines: MMEN, MN4, MMIN, MN5, MMTN, N555, MMCN and MN5MMMM with water. The ON stretching fundamental on top of b2 is obtained by b2ON-b2 and ON on top of OHb is calculated as OHbON(xONn)-OHb with their uncertainties  $\Delta\text{ON}$ . The mass of amines by atomic unit  $u$  is also shown. See Fig. 8 from the main text.

| Code    | Mass/ $u$ | $\tilde{\nu}(\text{raw})$ |                   |               |                   | Deperturbed by model C' |                   |               |                   |
|---------|-----------|---------------------------|-------------------|---------------|-------------------|-------------------------|-------------------|---------------|-------------------|
|         |           | ON(b2ON-b2)               | $\Delta\text{ON}$ | ON(OHbON-OHb) | $\Delta\text{ON}$ | ON(b2ON-b2)             | $\Delta\text{ON}$ | ON(OHbON-OHb) | $\Delta\text{ON}$ |
| MMEN    | 73        | 160.2                     | 0.9               | 145.5         | 2.3               | 125.4                   | 4.5               | 149.5         | 6.6               |
| MN4     | 85        | 156.8                     | 1.3               | 142.2         | 1.3               | 122.8                   | 5.4               | 144.7         | 7.7               |
| MMIN    | 87        | 161.0                     | 0.6               | 145.9         | 1.8               | 117.6                   | 2.8               | 155.2         | 5.9               |
| MN5     | 99        | 153.6                     | 1.4               | 140.1         | 1.9               | 121.5                   | 5.8               | 141.0         | 7.8               |
| MMTN    | 101       | 164.2                     | 1.0               | 144.6         | 1.9               | 111.6                   | 4.9               | 156.6         | 6.6               |
| N555    | 111       | 157.9                     | 0.9               | 143.9         | 2.3               | 113.4                   | 4.1               | 150.9         | 6.8               |
| MMCN    | 127       | 161.1                     | 0.9               | 144.6         | 1.0               | 114.4                   | 5.6               | 148.3         | 5.3               |
| MN5MMMM | 155       | 158.0                     | 2.5               | 135.6         | 1.2               | 101.2                   | 6.9               | 135.3         | 6.8               |

## 7 Quantum chemical bridging

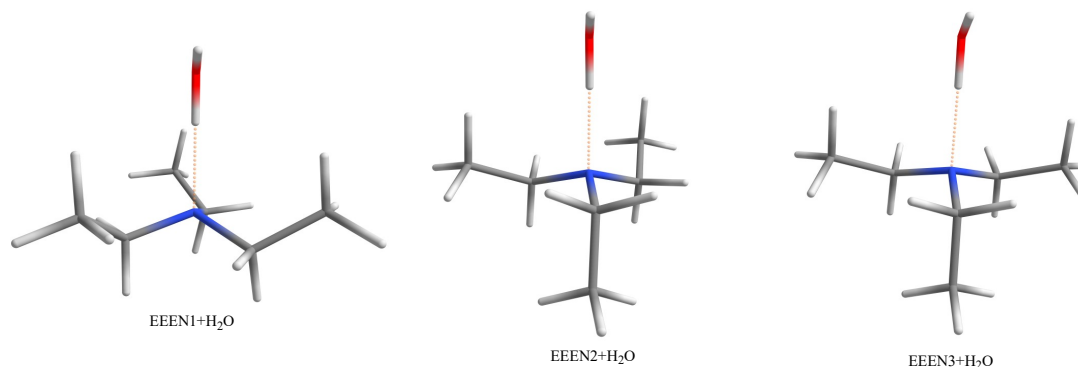

**Figure S14:** Three conformers of triethylamine (EEEN) heterodimer with water: EEEN1+H<sub>2</sub>O, EEEN2+H<sub>2</sub>O and EEEN3+H<sub>2</sub>O. The global minimum structure is EEEN1+H<sub>2</sub>O.

**Table S19:** Relative electronic  $\Delta E_{el}$  and zero point corrected  $\Delta E_0$  energy of three different conformers of triethylamine (EEEN): EEEN1, EEEN2 and EEEN3 using B3LYP-D3/def2-TZVP. The energy barriers between conformers are also shown both in relative electronic  $\Delta E_{el}$  and zero point corrected  $\Delta E_0$  energy. All of the relative energies are calculated from the energy of the global minimum conformer. These conformer structures are shown in Fig. 9 from the main text.

| Conformer | $\Delta E_{el}/(\text{kJ/mol})$ | $\Delta E_0/(\text{kJ/mol})$ | Barrier        | $\Delta E_{el}/(\text{kJ/mol})$ | $\Delta E_0/(\text{kJ/mol})$ |
|-----------|---------------------------------|------------------------------|----------------|---------------------------------|------------------------------|
| EEEN1     | 0                               | 0                            | EEEN3 to EEEN1 | 26.1                            | 25.9                         |
| EEEN2     | 2.3                             | 3                            | EEEN2 to EEEN1 | 23.8                            | 23.7                         |
| EEEN3     | 2.1                             | 3.2                          | EEEN3 to EEEN2 | 8.7                             | 8.5                          |

**Table S20:** Relative electronic  $\Delta E_{el}$  and zero point corrected  $\Delta E_0$  energy and the harmonic wavenumber  $\omega/\text{cm}^{-1}$  of b2, OHb, b2ON, b2ON2 and OHbON for three different conformers of triethylamine (EEEN) with water: EEEN1+H<sub>2</sub>O, EEEN2+H<sub>2</sub>O and EEEN3+H<sub>2</sub>O using B3LYP-D3/def2-TZVP. These conformer structures are shown in Fig. S14.

| Conformer              | $\Delta E_{el}/(\text{kJ/mol})$ | $\Delta E_0/(\text{kJ/mol})$ | b2     | OHb    | b2ON   | b2ON2  | OHbON  |
|------------------------|---------------------------------|------------------------------|--------|--------|--------|--------|--------|
| EEEN1+H <sub>2</sub> O | 0                               | 0                            | 3320.1 | 3376.7 | 3476.7 | 3633.2 | 3533.3 |
| EEEN2+H <sub>2</sub> O | 1.8                             | 1.9                          | 3329.8 | 3350.7 | 3488.9 | 3648.0 | 3509.8 |
| EEEN3+H <sub>2</sub> O | 0.9                             | 1.2                          | 3326.4 | 3345.9 | 3489.4 | 3652.5 | 3508.9 |

**Table S21:** Harmonic and deperturbed wavenumbers (in  $\text{cm}^{-1}$ ) of b2, OHb, b2ON and b2ON2 for three different conformers of EEEN monohydrates: EEEN1, EEEN2 and EEEN3 by applying the coupling model C.

| Code      | $\omega$ by model C |      |      |       | correction by model C |     |      |       | Deperturbed $\tilde{\nu}$ by model C |      |      |       |
|-----------|---------------------|------|------|-------|-----------------------|-----|------|-------|--------------------------------------|------|------|-------|
|           | b2                  | OHb  | b2ON | b2ON2 | b2                    | OHb | b2ON | b2ON2 | b2                                   | OHb  | b2ON | b2ON2 |
| EEEN1+H2O | 3320                | 3377 | 3477 | 3633  | 103                   | 89  | 150  | 223   | 3217                                 | 3288 | 3327 | 3410  |
| EEEN2+H2O | 3330                | 3351 | 3489 | 3648  | 103                   | 89  | 150  | 223   | 3227                                 | 3262 | 3339 | 3425  |
| EEEN3+H2O | 3326                | 3346 | 3489 | 3653  | 103                   | 89  | 150  | 223   | 3223                                 | 3257 | 3339 | 3430  |

**Table S22:** Perturbed wavenumbers  $\tilde{\nu}$  (in  $\text{cm}^{-1}$ ) for b2, OHb, b2ON and b2ON2 and their perturbed intensities  $I$  for three different conformers of EEEN monohydrates: EEEN1, EEEN2 and EEEN3 by applying the coupling model C. See Fig. 10 from the main text.

| Code      | Perturbed $\tilde{\nu}$ by model C |      |      |       | Perturbed $I$ by model C |      |      |       |
|-----------|------------------------------------|------|------|-------|--------------------------|------|------|-------|
|           | b2                                 | OHb  | b2ON | b2ON2 | b2                       | OHb  | b2ON | b2ON2 |
| EEEN1+H2O | 3192                               | 3290 | 3344 | 3416  | 0.22                     | 0.48 | 0.25 | 0.05  |
| EEEN2+H2O | 3191                               | 3282 | 3350 | 3429  | 0.36                     | 0.50 | 0.12 | 0.03  |
| EEEN3+H2O | 3187                               | 3279 | 3350 | 3433  | 0.36                     | 0.51 | 0.11 | 0.02  |

**Table S23:** Harmonic and deperturbed wavenumbers (in  $\text{cm}^{-1}$ ) of b2, OHb, b2ON and OHbON for three different conformers of EEEN monohydrates: EEEN1, EEEN2 and EEEN3 by applying the coupling model C'.

| Code      | $\omega$ by model C' |      |      |       | correction by model C' |     |      |       | Deperturbed $\tilde{\nu}$ by model C' |      |      |       |
|-----------|----------------------|------|------|-------|------------------------|-----|------|-------|---------------------------------------|------|------|-------|
|           | b2                   | OHb  | b2ON | OHbON | b2                     | OHb | b2ON | OHbON | b2                                    | OHb  | b2ON | OHbON |
| EEEN1+H2O | 3320                 | 3377 | 3477 | 3533  | 103                    | 89  | 150  | 105   | 3217                                  | 3288 | 3327 | 3428  |
| EEEN2+H2O | 3330                 | 3351 | 3489 | 3510  | 103                    | 89  | 150  | 105   | 3227                                  | 3262 | 3339 | 3405  |
| EEEN3+H2O | 3326                 | 3346 | 3489 | 3509  | 103                    | 89  | 150  | 105   | 3223                                  | 3257 | 3339 | 3404  |

**Table S24:** Perturbed wavenumbers  $\tilde{\nu}$  (in  $\text{cm}^{-1}$ ) for b2, OHb, b2ON and OHbON and their perturbed intensities  $I$  for three different conformers of EEEN monohydrates: EEEN1, EEEN2 and EEEN3 by applying the coupling model C'. See Fig. 10 from the main text.

| Code      | Perturbed $\tilde{\nu}$ by model C' |      |      |       | Perturbed $I$ by model C' |      |      |       |
|-----------|-------------------------------------|------|------|-------|---------------------------|------|------|-------|
|           | b2                                  | OHb  | b2ON | OHbON | b2                        | OHb  | b2ON | OHbON |
| EEEN1+H2O | 3192                                | 3290 | 3345 | 3433  | 0.22                      | 0.48 | 0.26 | 0.04  |
| EEEN2+H2O | 3191                                | 3282 | 3349 | 3410  | 0.36                      | 0.49 | 0.11 | 0.04  |
| EEEN3+H2O | 3187                                | 3278 | 3349 | 3409  | 0.36                      | 0.50 | 0.10 | 0.04  |

## 8 Methylation instead of deuteration

**Table S25:** Harmonic wavenumber  $\omega$  for two vibrations  $\text{ON}_1$  and  $\text{ON}_2$  with ON stretching character and OH stretching fundamental OHb of the heterodimer of tertiary amines with methanol and experimental wavenumber  $\tilde{\nu}$  for OHb. See Fig. 11 from the main document.

| Code    | $\omega/\text{cm}^{-1}$ |               |        | $\tilde{\nu}/\text{cm}^{-1}$ |
|---------|-------------------------|---------------|--------|------------------------------|
|         | $\text{ON}_1$           | $\text{ON}_2$ | OHb    | OHb                          |
| MN4     | 178.5                   | 121.3         | 3381.7 | 3287                         |
| MMCN    | 181.6                   | 125.8         | 3359.4 | 3262                         |
| MMTN    | 187.0                   | 121.4         | 3342.6 | 3249                         |
| MN5MMMM | 185.9                   | 116.0         | 3329.1 | 3226                         |

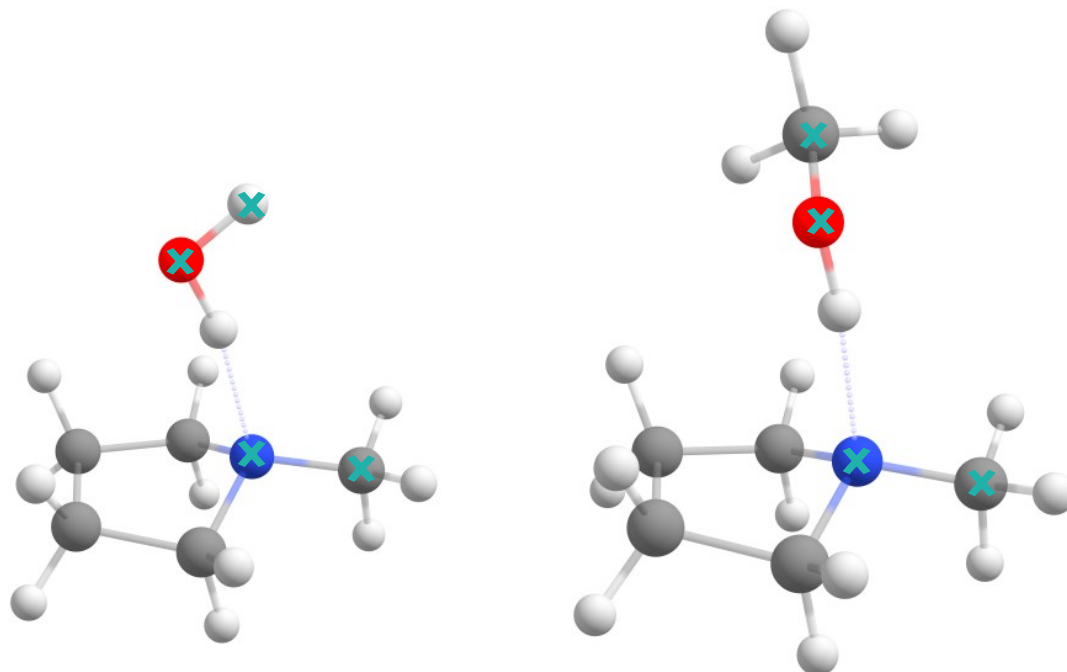

**Figure S15:** Torsion angle around hydrogen bond  $\angle\text{CNOH}$  for the exemplary monohydrate of tertiary amines with water and  $\angle\text{CNOC}$  with methanol. The atoms included in the torsion angle are labelled "X". The angles are described in Table S26.



**Table S26:** Torsion angles around hydrogen bond  $\angle\text{CNOH}$  for the monohydrate of tertiary amines with water and  $\angle\text{CNOC}$  with methanol using B3LYP-D3/def2-TZVP.

| Code    | H <sub>2</sub> O<br>$\angle\text{CNOH}$ | MeOH<br>$\angle\text{CNOC}$ |
|---------|-----------------------------------------|-----------------------------|
| MN4     | 2                                       | 84                          |
| MMCN    | 106                                     | 56                          |
| MMTN    | 175                                     | 115                         |
| MN5MMMM | 0                                       | 0                           |

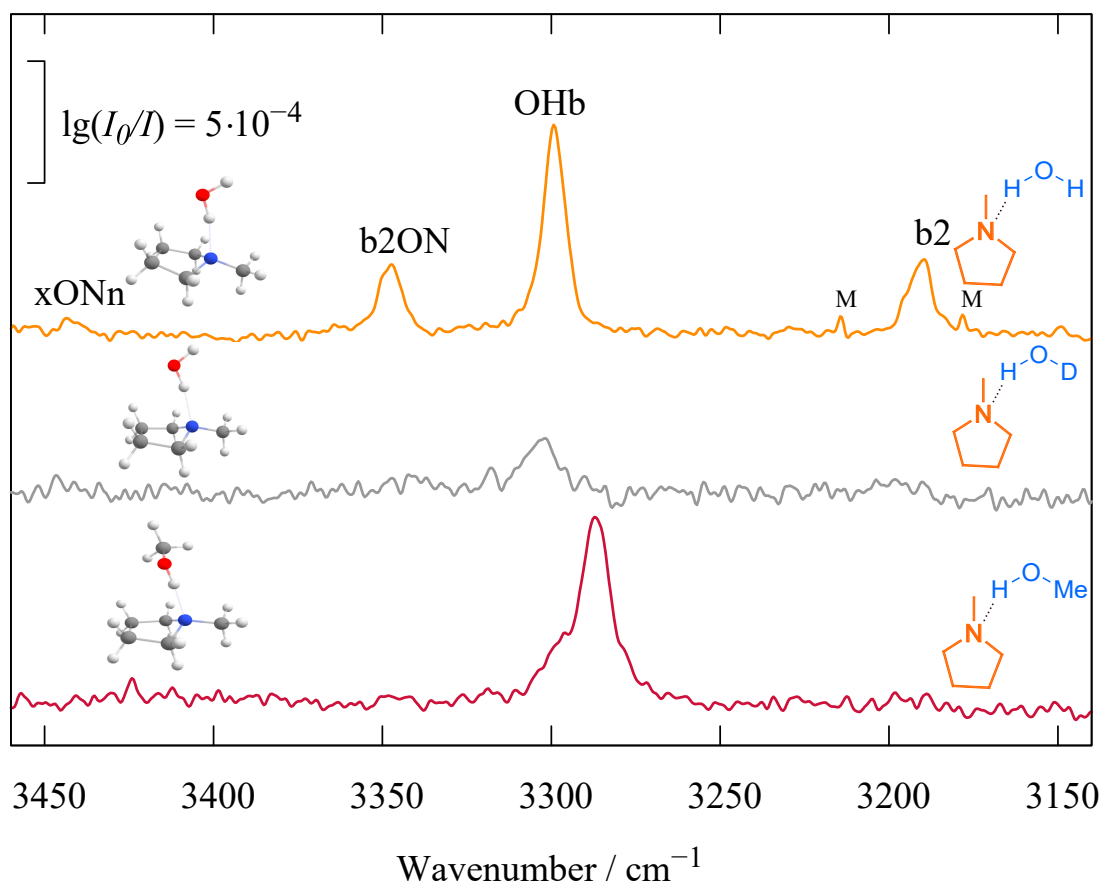

**Figure S16:** Spectra for the monohydrate of N-Methylpyrrolidine with HOH, DOH and MeOH. The upper trace is the monohydrate of N-Methylpyrrolidine with HOH which have four signals: OHb, b2, b2ON and xONn through anharmonic resonance. The middle trace is for the monohydrate with DOH and the lower one is with methanol. Both of them have a single OHb signal.

## 9 Dihydrate contributions to the HyDRA database

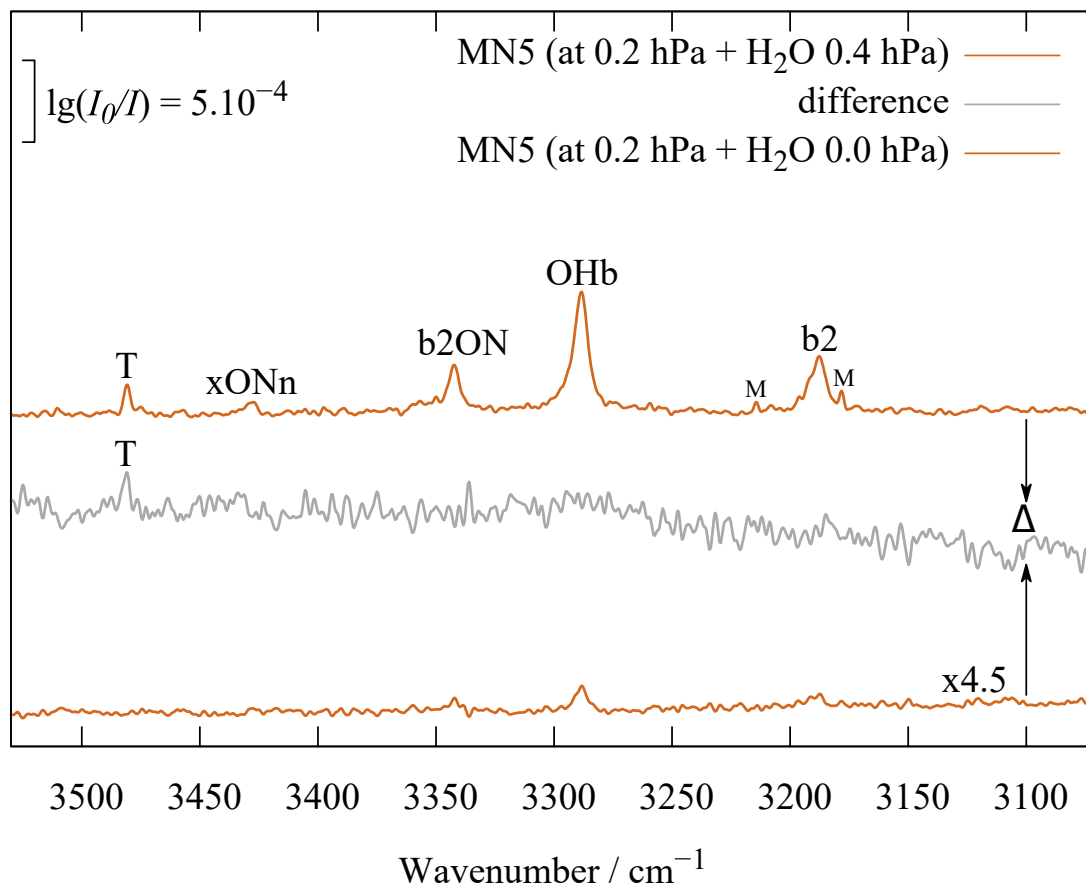

**Figure S17:** The dihydrate WWA for MN5 can be clearly separated from the heterodimer features. T is the raw dihydrate signal for indirect solvation contact.

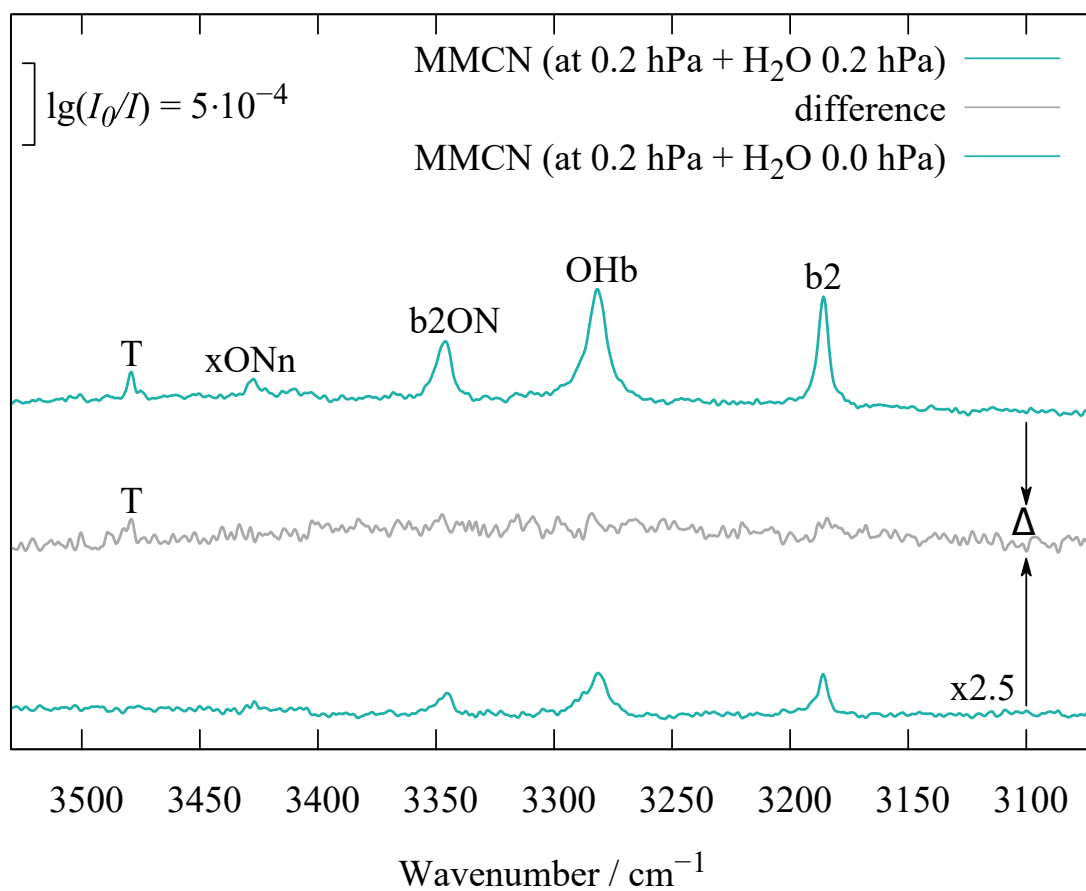

**Figure S18:** The dihydrate WWA for MMCN can be clearly separated from the heterodimer features. T is the raw dihydrate signal for indirect solvation contact.

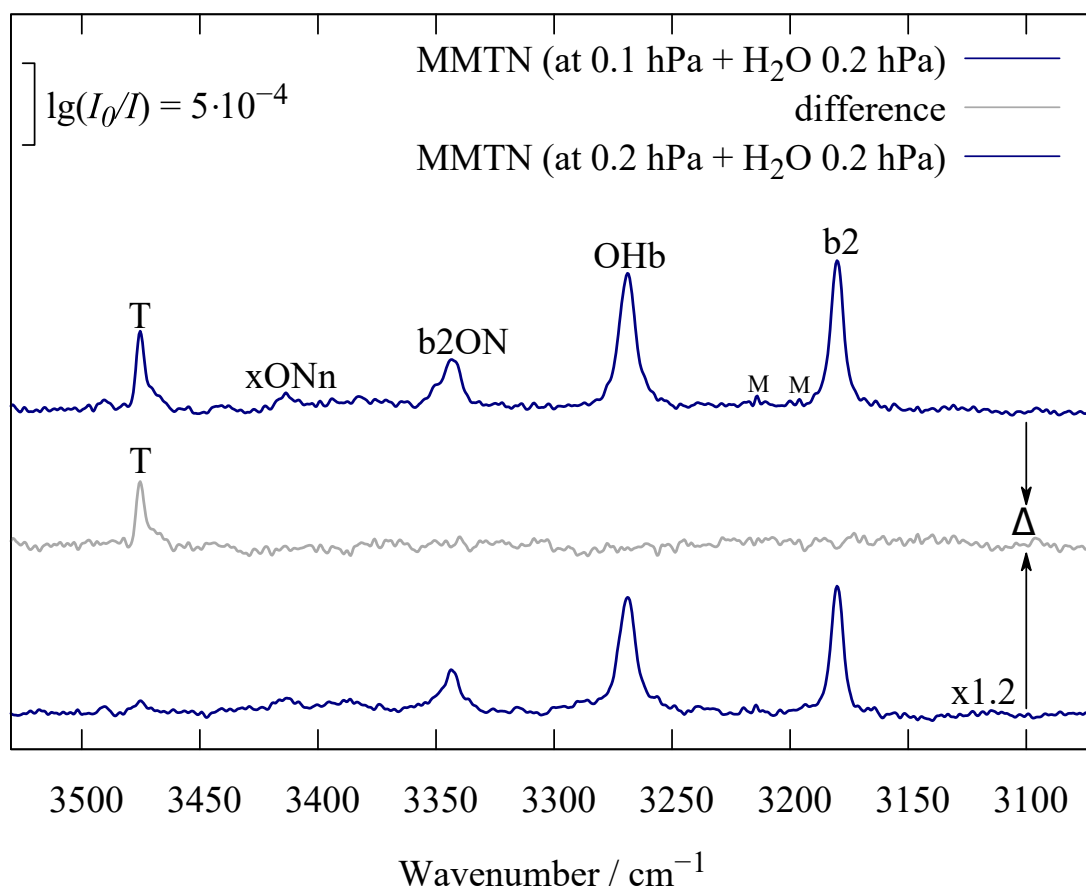

**Figure S19:** The dihydrate WWA for MMTN can be clearly separated from the heterodimer features. T is the raw dihydrate signal for indirect solvation contact.

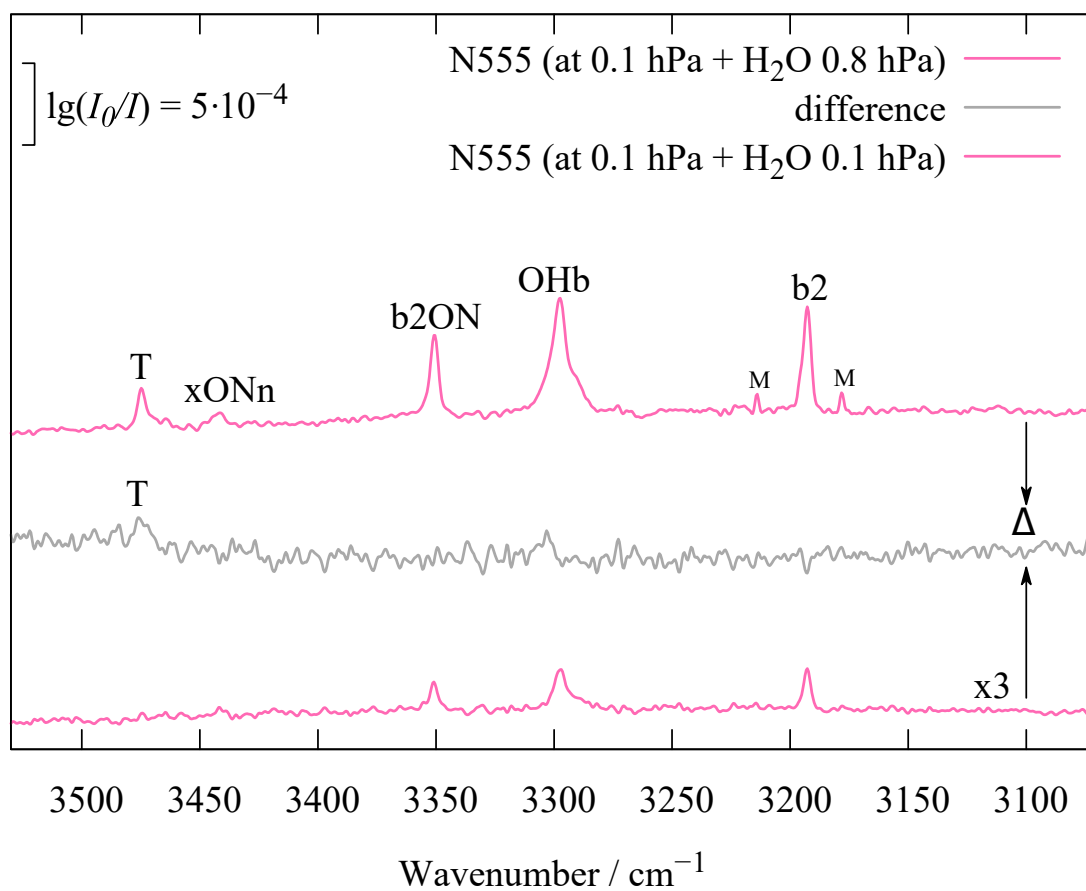

**Figure S20:** The dihydrate WWA for N555 can be clearly separated from the heterodimer features. T is the raw dihydrate signal for indirect solvation contact.

## 10 Experimental spectra of triisopropylamine (IIIN)

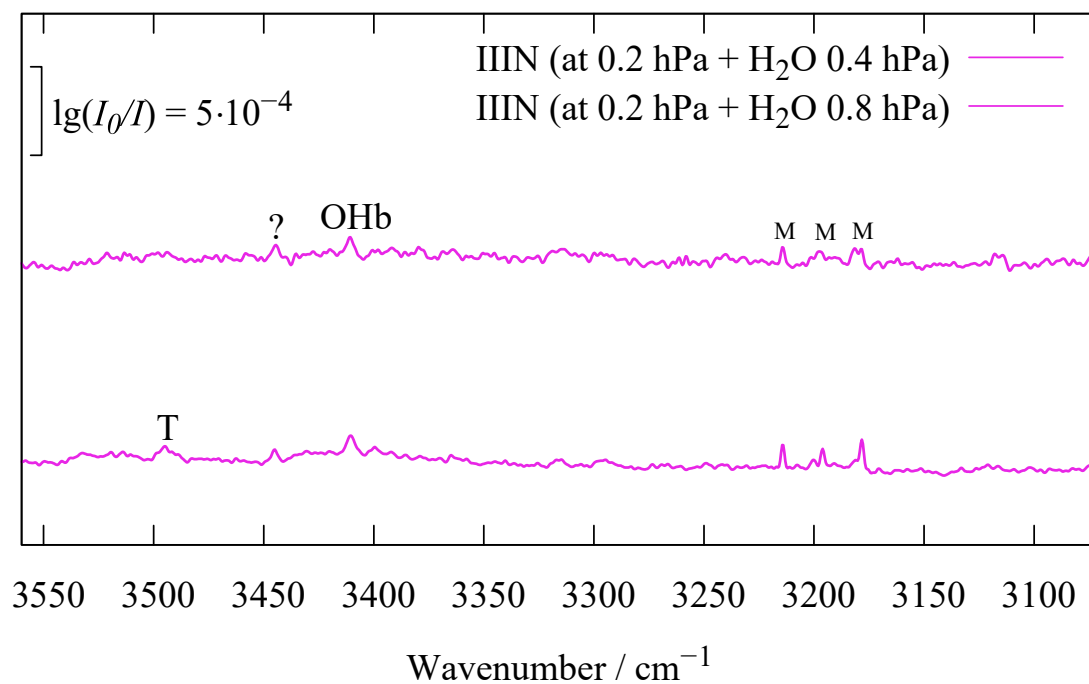

**Figure S21:** Spectra of the monohydrate WA and dihydrate WWA of triisopropylamine (IIIN) with two different concentrations of water. The dihydrate WWA for IIIN can be clearly separated from the heterodimer features. T is the raw dihydrate signal for indirect solvation contact.

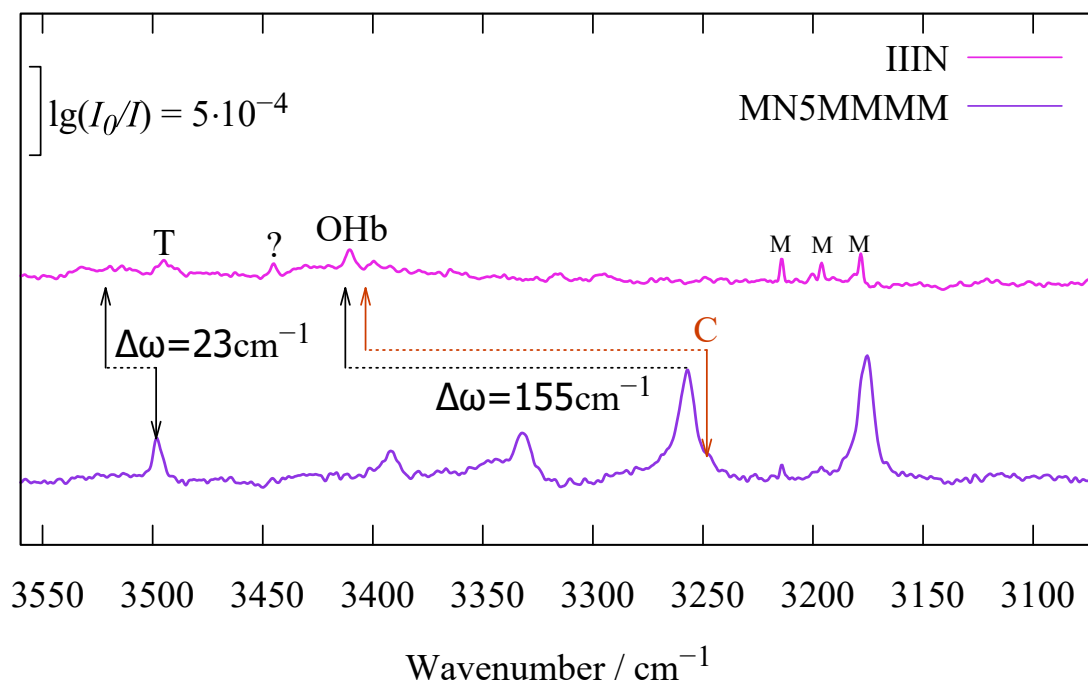

**Figure S22:** Spectral comparison of IIN and MN5MMMM with water. The OH stretching vibration OHb for IIN monohydrate is predicted by adding the harmonic shift  $155\text{ cm}^{-1}$  to the raw and the centroid C position of MN5MMMM. The raw dihydrate signal for indirect solvation contact T is predicted by adding the harmonic shift  $23\text{ cm}^{-1}$  to the raw T position of MN5MMMM.

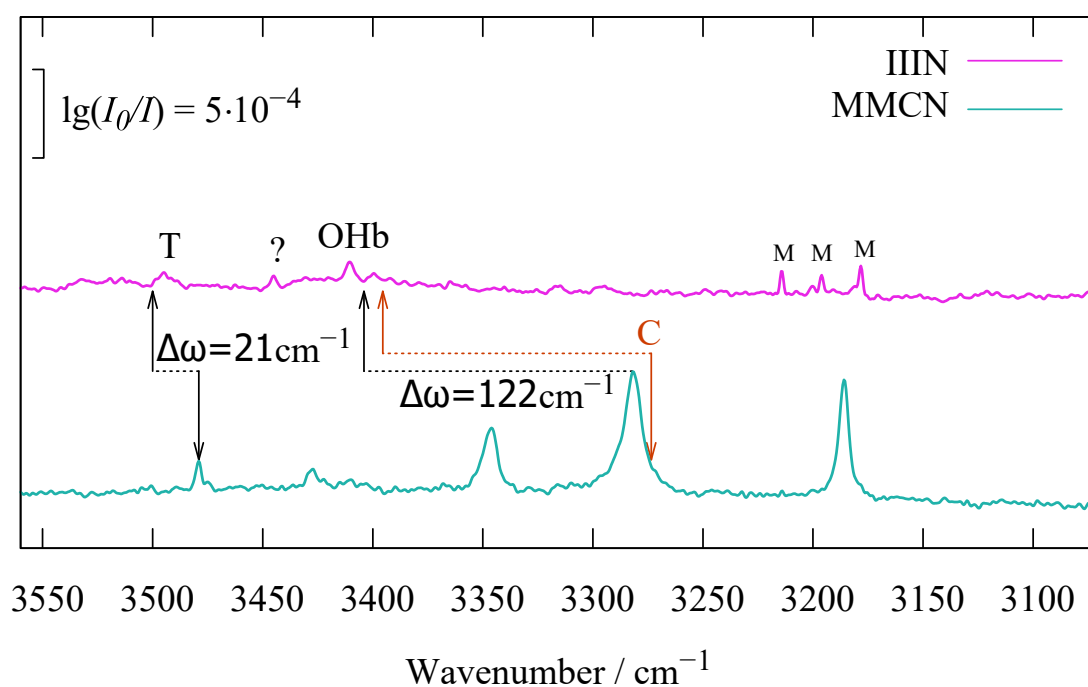

**Figure S23:** Spectral comparison of IIN and MMCN with water. The OH stretching vibration OHb for IIN monohydrate is predicted by adding the harmonic shift  $122\text{ cm}^{-1}$  to the raw and the centroid C position of MMCN. The raw dihydrate signal for indirect solvation contact T is predicted by adding the harmonic shift  $21\text{ cm}^{-1}$  to the raw T position of MMCN.

## 11 Example inputs for transition states

NEB scans<sup>[15]</sup> are used to calculate the energy barrier between three EEEN conformers: EEEN1, EEEN2 and EEEN3. The structure of the transition state from the NEB scan is reoptimized again by using B3LYP-D3/def2-TZVP on ORCA 5.0.3 with the keywords shown in Table S28. The figure for the energy barrier of EEEN conformers is shown in Fig. 9 in the main text.

For convenience, an example input for the NEB scan and transition state calculation are given in Table S27 and S28.

**Table S27:** Example input for NEB scan in the ORCA 5.0.3 calculations at the B3LYP level of computation. In the input file, "start.xyz" is the name of the beginning conformer and "end.xyz" is the name of the ending conformer that needed to convert.<sup>[15]</sup>

| type of calculation | input                                                                                                                                                                                                                                                                                                       |
|---------------------|-------------------------------------------------------------------------------------------------------------------------------------------------------------------------------------------------------------------------------------------------------------------------------------------------------------|
| NEB scan            | !NEB-CI B3LYP D3BJ abc def2-TZVP VeryTightSCF defgrid3 Mass2016<br>%neb<br>NEB_End_XYZFile "start.xyz"<br>SpringType DOF<br>PerpSpring cosTan<br>Tol_MaxF_CI 2.e-3<br>Tol_RMSF_CI 1.e-3<br>Tol_Scale 10.0<br>Local true<br>Nimages 30<br>end<br>%pal nprocs 30 end<br>%Maxcore 3000<br>*xyzfile 0 1 end.xyz |

**Table S28:** Example input for the transition state calculation in the ORCA 5.0.3 calculations at the B3LYP level of computation.<sup>[16]</sup>

| type of calculation | input                                                                                                                                                                                                                                                                                                         |
|---------------------|---------------------------------------------------------------------------------------------------------------------------------------------------------------------------------------------------------------------------------------------------------------------------------------------------------------|
| Transition state    | !B3LYP D3BJ abc def2-TZVP UseSym SlowConv OptTS VeryTightOpt<br>VeryTightSCF Freq defgrid3 Mass2016<br>%method SymThresh 5.0e-2 end<br>%geom<br>Calc_Hess true<br>Recalc_Hess 3<br>ENFORCESTRICTCONVERGENCE true<br>MaxIter 500<br>end<br>%pal nprocs NUMCORES end<br>%Maxcore 3000<br>*xyzfile 0 1 Start.xyz |



## References

- [1] H. C. Gottschalk, T. L. Fischer, V. Meyer, R. Hildebrandt, U. Schmitt, M. A. Suhm, *Instruments* **2021**, *5*, 12.
- [2] N. O. B. Lüttchwager, *Phys. Chem. Chem. Phys.* **2024**, *26*, 10120–10135.
- [3] N. O. B. Lüttchwager, *Journal of Open Source Software* **2021**, *6*, 3526.
- [4] S. Grimme, J. Antony, S. Ehrlich, H. Krieg, *J. Chem. Phys.* **2010**, *132*, 154104.
- [5] S. Grimme, S. Ehrlich, L. Goerigk, *J. Comput. Chem.* **2011**, *32*, 1456–1465.
- [6] F. Weigend, R. Ahlrichs, *Phys. Chem. Chem. Phys.* **2005**, *7*, 3297–3305.
- [7] W. Sander, S. Roy, I. Polyak, J. M. Ramirez-Angueta, E. Sanchez-Garcia, *J. Am. Chem. Soc.* **2012**, *134*, 8222–8230.
- [8] D. Leicht, M. Kaufmann, R. Schwan, J. Schäfer, G. Schwaab, M. Havenith, *J. Chem. Phys.* **2016**, *145*, 204305.
- [9] F. Neese, *Wiley Interdiscip. Rev. Comput. Mol. Sci.* **2012**, *2*, 73–78.
- [10] F. Neese, *Wiley Interdiscip. Rev. Comput. Mol. Sci.* **2022**, *12*, e1606.
- [11] M. A. Marques, M. J. Oliveira, T. Burnus, *Computer Physics Communications* **2012**, *183*, 2272–2281.
- [12] S. Lehtola, C. Steigemann, M. J. Oliveira, M. A. Marques, *SoftwareX* **2018**, *7*, 1–5.
- [13] S. Grimme, *J. Chem. Theory Comput.* **2019**, *15*, 2847–2862.
- [14] P. Pracht, F. Bohle, S. Grimme, *Phys. Chem. Chem. Phys.* **2020**, *22*, 7169–7192.
- [15] V. Ásgeirsson, B. O. Birgisson, R. Bjornsson, U. Becker, F. Neese, C. Riplinger, H. Jónsson, *Journal of Chemical Theory and Computation* **2021**, *17*, PMID: 34275279, 4929–4945.
- [16] B. Dmytro, P. Taras, I. Róbert, K. Simone, B. Ute, V. Edward, N. Frank, *Molecular Physics* **2015**, *113*, 1961–1977.

---

## **Part 2: Julia Package Fermi4x4**

## Contents

|                                              |     |
|----------------------------------------------|-----|
| Introduction . . . . .                       | F3  |
| Finding Proper <b>L</b> . . . . .            | F4  |
| Building a General <b>L</b> Matrix . . . . . | F4  |
| Finding <b>D</b> . . . . .                   | F9  |
| References . . . . .                         | F10 |
| Appendix: Checks for Correctness . . . . .   | F10 |
| 3x3 Problem . . . . .                        | F10 |
| 4x4 Problem . . . . .                        | F12 |

## Part 2: Julia Package Fermi4x4

---

This document explains the inner workings of the Fermi4x4 package. In particular, it derives the mathematical expressions which are used in the package. Derivation of these expressions was done using Python (<https://python.org/>), Numpy (<https://numpy.org/>), and Sympy (<https://sympy.org/>) in the versions specified below.

This document is a converted Jupyter notebook (found together with the Fermi4x4 source code under <https://gitlab.gwdg.de/nluetts/fermi4x4.jl>) and therefore contains code blocks which show how exactly the mathematical expressions were derived. Note that the output of a code block is shown directly under it and it is required for the understanding of the text.

```
1 # imports
2 import sys
3
4 import numpy as np
5 import sympy as sy
6 from IPython.display import Markdown, display
7 from sympy import Matrix, cos, sin, symbols
```

```
1 # print versions, for reproducibility
2 print("Python version: ", sys.version)
3 print("Numpy version: ", np.__version__)
4 print("Sympy version: ", sy.__version__)
```

```
1 Python version: 3.11.9 | packaged by conda-forge | (main, Apr 19 2024, 18:36:13) [GCC 12.3.0]
2 Numpy version: 1.26.4
3 Sympy version: 1.12
```

```
1 def disp_eq(var, expr):
2     if type(var) == str:
3         display(sy.Eq(sy.Symbol(var), expr, evaluate=False))
4     else:
5         display(sy.Eq(var, expr, evaluate=False))
```

## Introduction

This Julia package provides functions to solve a particular type of inverse eigenvalue problem that comes up in vibrational spectroscopy: Given a set 3 to 4 experimental band positions and associated intensities, where it is assumed that the excited states perturb each other due to anharmonic resonance, find a set of *deperturbed* wavenumbers and coupling elements that are compatible with the experimental data.

In terms of linear algebra, the problem can be formulated as follows:

$$\mathbf{D} = \mathbf{L}\mathbf{F}\mathbf{L}^T$$

Here,  $\mathbf{D}$  is a symmetric 3x3 or 4x4 matrix that holds deperturbed band positions (diagonal elements) and coupling elements (off-diagonal elements).  $\mathbf{F}$  is a diagonal matrix made up of the eigenvalues of  $\mathbf{D}$ , which are the observed (perturbed) band positions.  $\mathbf{L}$  is an orthonormal matrix built from the eigenvectors of  $\mathbf{D}$  and contains information about the experimental intensities. This intensity information is, however, not enough to fully specify  $\mathbf{L}$ . Thus, to solve the problem, several assumptions are made:

- There is only one deperturbed state with a relevant ground state transition moment, the "bright state", while the remaining 2 to 3 deperturbed "dark states" have negligible transition moments.
- Some of the coupling elements are *constrained* to certain values

With  $\mathbf{F}$  being available from the experiment, the task is to find proper  $\mathbf{L}$  that yield coupling elements in the  $\mathbf{D}$  matrix that fulfill the given constraints. One row vector of  $\mathbf{L}$  is derived from experimental intensities. Finding the remaining elements is done *via* a minimization step.

Note that it is also possible to solve a 2x2 (Fermi resonance) problem by setting the intensity of one band put into the 3x3 problem to zero.

## Finding Proper $\mathbf{L}$

The matrix  $\mathbf{L}$  is orthonormal, of size 3x3 or 4x4, and has one normalized row vector of the form:

$$\vec{l}_1 = [\sqrt{I_1}, \sqrt{I_2}, \sqrt{I_3}, (\sqrt{I_4})] = [b_1, b_2, b_3, b_4]$$

The elements  $I_i$  are experimental intensities and are scaled so that the vector  $\vec{l}_1$  is of length 1.

The experimental intensities are not sufficient to fully specify  $\mathbf{L}$ : An orthonormal  $n \times n$  matrix has  $n(n - 1)/2$  degrees of freedom (DOF), yielding 3 DOF for the 3x3 and 6 DOF for the 4x4 matrix. With the experimental intensities, 2 (3x3) or 3 (4x4) of these DOF are already constrained (one DOF less than the number of intensities, because the row vector shown above is normalized). This leaves **1 degree of freedom for the 3x3 problem and 3 degrees of freedom for 4x4 problem.**

To solve the inverse eigenvalue problem, the 1 (3) remaining DOF of the  $\mathbf{L}$  matrix are varied such that the off-diagonal elements of the  $\mathbf{D}$  matrix stay true to certain constraints provided by the user, e.g. couplings among dark states may be forced to zero. However, we have yet to define what these degrees of freedom actually are.

## Building a General $\mathbf{L}$ Matrix

There are several ways to set up the degrees of freedom in a general expression, but here we derive an expression for  $\mathbf{L}$  as follows: From experimental intensities, we have one row vector  $\vec{l}_1$  given above. Additionally, we use the fact that if  $\mathbf{A}$  is an orthonormal matrix and  $\mathbf{B}$  is an orthonormal matrix and

$$\mathbf{C} = \begin{pmatrix} 1 & 0 \\ 0 & \mathbf{B} \end{pmatrix}$$

then  $\mathbf{L} = \mathbf{C} \times \mathbf{A}$  is an orthonormal matrix with the same first row as  $\mathbf{A}$  [1]. This allows us to generate different valid (orthonormal)  $\mathbf{L}$  matrices while keeping the known row vector from the experimental data.

For  $\mathbf{A}$  we need an "initial guess". For  $\mathbf{B}$  for the 3x3 problem we choose the general 2x2 rotation matrix in 2 dimensions (in the xy plane) which then constrains, *via* its rotation angle  $\theta$ , the one remaining DOF of  $\mathbf{L}_{3 \times 3}$  when one normal row vector is already given:

```
1 # Rotation in xy plane in 2D
2 def get_B_3x3():
3     theta = symbols("theta")
4     R = Matrix([[cos(theta), -sin(theta)], [sin(theta), cos(theta)]])
5     return R
6
7
8 B_3x3 = get_B_3x3()
9
10 disp_eq("B_{3}\times3", B_3x3)
```

$$B_{3 \times 3} = \begin{bmatrix} \cos(\theta) & -\sin(\theta) \\ \sin(\theta) & \cos(\theta) \end{bmatrix}$$

For  $\mathbf{B}$  for the 4x4 problem, we choose a general 3x3 rotation matrix in 3 dimensions which constrains the 3 remaining DOF of  $\mathbf{L}_{4 \times 4}$  *via* its rotation angles around the  $x$ ,  $y$  and  $z$  axes:

```
1 # Rotation in yz plane in 3D
2 def Rx():
3     tx = symbols("theta_x")
4     R = Matrix([[1, 0, 0], [0, cos(tx), -sin(tx)], [0, sin(tx), cos(tx)]])
5     return R
6
7
8 # Rotation in xz plane in 3D
9 def Ry():
10    ty = symbols("theta_y")
11    R = Matrix([[cos(ty), 0, sin(ty)], [0, 1, 0], [-sin(ty), 0, cos(ty)]])
12    return R
13
14
15 # Rotation in xy plane in 3D
16 def Rz():
17    tz = symbols("theta_z")
```

## Part 2: Julia Package Fermi4x4

```

18     R = Matrix([[cos(tz), -sin(tz), 0], [sin(tz), cos(tz), 0], [0, 0, 1]])
19     return R
20
21
22 # Rotation around all 3 axes in 3D
23 def get_B_4x4():
24     return Rx() * Ry() * Rz()
25
26
27 B_4x4 = get_B_4x4()
28
29 disp_eq("B_{4\\times4}", B_4x4)

```

$$B_{4 \times 4} = \begin{bmatrix} \cos(\theta_y) \cos(\theta_z) & -\sin(\theta_z) \cos(\theta_y) & \sin(\theta_y) \\ \sin(\theta_x) \sin(\theta_y) \cos(\theta_z) + \sin(\theta_z) \cos(\theta_x) & -\sin(\theta_x) \sin(\theta_y) \sin(\theta_z) + \cos(\theta_x) \cos(\theta_z) & -\sin(\theta_x) \cos(\theta_y) \\ \sin(\theta_x) \sin(\theta_z) - \sin(\theta_y) \cos(\theta_x) \cos(\theta_z) & \sin(\theta_x) \cos(\theta_z) + \sin(\theta_y) \sin(\theta_z) \cos(\theta_x) & \cos(\theta_x) \cos(\theta_y) \end{bmatrix}$$

For the 3x3 problem, we construct the initial orthonormal matrix  $\mathbf{A}$  starting with the vector  $\vec{l}_1$ , finding an orthogonal vector  $\vec{l}_2$  by setting  $z_2 = 0$  (an arbitrary choice) and then calculating the cross product of  $\vec{l}_1$  and  $\vec{l}_2$  to find  $\vec{l}_3$ :

```

1  def get_A_3x3():
2     a1, a2 = symbols("a1, a2")
3     b1, b2, b3 = symbols("b1, b2, b3")
4     # find elements of l_2
5     a1, a2 = sy.solve([a1**2 + a2**2 - 1, a1 * b1 + a2 * b2], a1, a2)[0]
6     v1 = sy.Matrix([b1, b2, b3])
7     v2 = sy.Matrix([a1, a2, 0])
8     v3 = v2.cross(v1)
9     return Matrix([v1, v2, v3]).reshape(3, 3)
10
11
12 A_3x3 = get_A_3x3()
13
14 disp_eq("A_{3\\times3}", A_3x3)

```

$$A_{3 \times 3} = \begin{bmatrix} b_1 & b_2 & b_3 \\ -b_2 \sqrt{\frac{1}{b_1^2 + b_2^2}} & b_1 \sqrt{\frac{1}{b_1^2 + b_2^2}} & 0 \\ b_1 b_3 \sqrt{\frac{1}{b_1^2 + b_2^2}} & b_2 b_3 \sqrt{\frac{1}{b_1^2 + b_2^2}} & -b_1^2 \sqrt{\frac{1}{b_1^2 + b_2^2}} - b_2^2 \sqrt{\frac{1}{b_1^2 + b_2^2}} \end{bmatrix}$$



For the 4x4 problem, we construct the initial orthonormal matrix  $\mathbf{A}$  using a trick involving quaternions. In this way, the matrix is constructed by Sympy automatically:

```
1 A_4x4 = sy.Quaternion("b1", "b2", "b3", "b4").product_matrix_left.transpose()
2
3 disp_eq("A_{4\\times4}", A_4x4)
```

$$A_{4 \times 4} = \begin{bmatrix} b_1 & b_2 & b_3 & b_4 \\ -b_2 & b_1 & b_4 & -b_3 \\ -b_3 & -b_4 & b_1 & b_2 \\ -b_4 & b_3 & -b_2 & b_1 \end{bmatrix}$$

We can check for orthonormality to verify that this is a valid initial  $\mathbf{A}$  matrix (further such checks for correctness are included below):

```
1 AA_t = sy.simplify(A_4x4 * A_4x4.transpose())
2
3 disp_eq(sy.Symbol("A_{4\\times4}") * sy.Symbol("A_{4\\times4}") ** sy.Symbol("T"), AA_t)
```

$$A_{4 \times 4} A_{4 \times 4}^T = \begin{bmatrix} b_1^2 + b_2^2 + b_3^2 + b_4^2 & 0 & 0 & 0 \\ 0 & b_1^2 + b_2^2 + b_3^2 + b_4^2 & 0 & 0 \\ 0 & 0 & b_1^2 + b_2^2 + b_3^2 + b_4^2 & 0 \\ 0 & 0 & 0 & b_1^2 + b_2^2 + b_3^2 + b_4^2 \end{bmatrix}$$

This is OK, since  $\vec{l}_1$  is normalized ( $|\vec{l}_1| = \sum b_i^2 = 1$ ).

With both  $\mathbf{A}$  and  $\mathbf{B}$  in place, we can derive general expressions for  $\mathbf{L}_{3 \times 3}$  and  $\mathbf{L}_{4 \times 4}$ :

```
1 def get_C_3x3():
2     C = sy.eye(3)
3     C[1:3, 1:3] = get_B_3x3()
4     return C
5
6
7 C_3x3 = get_C_3x3()
8
```

## Part 2: Julia Package Fermi4x4

---

```

9 L_3x3 = C_3x3 * A_3x3
10 L_3x3.simplify()
11 disp_eq("L_{3\\times3}", L_3x3)

```

$$L_{3 \times 3} = \begin{bmatrix} b_1 & b_2 & b_3 \\ - (b_1 b_3 \sin(\theta) + b_2 \cos(\theta)) \sqrt{\frac{1}{b_1^2 + b_2^2}} & (b_1 \cos(\theta) - b_2 b_3 \sin(\theta)) \sqrt{\frac{1}{b_1^2 + b_2^2}} & (b_1^2 + b_2^2) \sqrt{\frac{1}{b_1^2 + b_2^2}} \sin(\theta) \\ (b_1 b_3 \cos(\theta) - b_2 \sin(\theta)) \sqrt{\frac{1}{b_1^2 + b_2^2}} & (b_1 \sin(\theta) + b_2 b_3 \cos(\theta)) \sqrt{\frac{1}{b_1^2 + b_2^2}} & - (b_1^2 + b_2^2) \sqrt{\frac{1}{b_1^2 + b_2^2}} \cos(\theta) \end{bmatrix}$$

```

1 def get_C_4x4():
2     C = sy.eye(4)
3     C[1:4, 1:4] = get_B_4x4()
4     return C
5
6
7 C_4x4 = get_C_4x4()
8
9 L_4x4 = C_4x4 * A_4x4
10 L_4x4.simplify()
11
12 for i in range(0, 4):
13     for j in range(0, 4):
14         disp_eq(f"L_{{4\\times4\\,({i+1}\\,\\,{{j+1}})}}", L_4x4[i, j])

```

$$L_{4 \times 4}(1, 1) = b_1$$

$$L_{4 \times 4}(1, 2) = b_2$$

$$L_{4 \times 4}(1, 3) = b_3$$

$$L_{4 \times 4}(1, 4) = b_4$$

$$L_{4 \times 4}(2, 1) = -b_2 \cos(\theta_y) \cos(\theta_z) + b_3 \sin(\theta_z) \cos(\theta_y) - b_4 \sin(\theta_y)$$

$$L_{4 \times 4}(2, 2) = b_1 \cos(\theta_y) \cos(\theta_z) + b_3 \sin(\theta_y) + b_4 \sin(\theta_z) \cos(\theta_y)$$

$$L_{4 \times 4}(2, 3) = -b_1 \sin(\theta_z) \cos(\theta_y) - b_2 \sin(\theta_y) + b_4 \cos(\theta_y) \cos(\theta_z)$$

$$L_{4 \times 4}(2, 4) = b_1 \sin(\theta_y) - b_2 \sin(\theta_z) \cos(\theta_y) - b_3 \cos(\theta_y) \cos(\theta_z)$$

$$L_{4 \times 4}(3, 1) = -b_2 (\sin(\theta_x) \sin(\theta_y) \cos(\theta_z) + \sin(\theta_z) \cos(\theta_x)) + b_3 (\sin(\theta_x) \sin(\theta_y) \sin(\theta_z) - \cos(\theta_x) \cos(\theta_z)) + b_4 \sin(\theta_x) \cos(\theta_y)$$

$$L_{4 \times 4}(3, 2) = b_1 (\sin(\theta_x) \sin(\theta_y) \cos(\theta_z) + \sin(\theta_z) \cos(\theta_x)) - b_3 \sin(\theta_x) \cos(\theta_y) + b_4 (\sin(\theta_x) \sin(\theta_y) \sin(\theta_z) - \cos(\theta_x) \cos(\theta_z))$$

$$L_{4 \times 4}(3, 3) = -b_1 (\sin(\theta_x) \sin(\theta_y) \sin(\theta_z) - \cos(\theta_x) \cos(\theta_z)) + b_2 \sin(\theta_x) \cos(\theta_y) + b_4 (\sin(\theta_x) \sin(\theta_y) \cos(\theta_z) + \sin(\theta_z) \cos(\theta_x))$$

$$L_{4 \times 4}(3, 4) = -b_1 \sin(\theta_x) \cos(\theta_y) - b_2 (\sin(\theta_x) \sin(\theta_y) \sin(\theta_z) - \cos(\theta_x) \cos(\theta_z)) - b_3 (\sin(\theta_x) \sin(\theta_y) \cos(\theta_z) + \sin(\theta_z) \cos(\theta_x))$$

$$L_{4 \times 4}(4, 1) = -b_2 (\sin(\theta_x) \sin(\theta_z) - \sin(\theta_y) \cos(\theta_x) \cos(\theta_z)) - b_3 (\sin(\theta_x) \cos(\theta_z) + \sin(\theta_y) \sin(\theta_z) \cos(\theta_x)) - b_4 \cos(\theta_x) \cos(\theta_y)$$

$$L_{4 \times 4}(4, 2) = b_1 (\sin(\theta_x) \sin(\theta_z) - \sin(\theta_y) \cos(\theta_x) \cos(\theta_z)) + b_3 \cos(\theta_x) \cos(\theta_y) - b_4 (\sin(\theta_x) \cos(\theta_z) + \sin(\theta_y) \sin(\theta_z) \cos(\theta_x))$$

$$L_{4 \times 4}(4, 3) = b_1 (\sin(\theta_x) \cos(\theta_z) + \sin(\theta_y) \sin(\theta_z) \cos(\theta_x)) - b_2 \cos(\theta_x) \cos(\theta_y) + b_4 (\sin(\theta_x) \sin(\theta_z) - \sin(\theta_y) \cos(\theta_x) \cos(\theta_z))$$

$$L_{4 \times 4}(4, 4) = b_1 \cos(\theta_x) \cos(\theta_y) + b_2 (\sin(\theta_x) \cos(\theta_z) + \sin(\theta_y) \sin(\theta_z) \cos(\theta_x)) - b_3 (\sin(\theta_x) \sin(\theta_z) - \sin(\theta_y) \cos(\theta_x) \cos(\theta_z))$$

## Finding **D**

The matrices  $L_{3 \times 3}$  and  $L_{4 \times 4}$  are hard-coded into Fermi4x4. The parameter(s)  $\theta_{(x,y,z)}$  are/is optimized iteratively to find an appropriate matrix **D** that stays true to user set constraints (such as some coupling elements being zero). This is done by minimizing a loss function which depends on the type of constraints enforced on **D**. For the simple case of some coupling elements set to zero, the loss function is simply the square root of the sum of squared deviations from zero.

## References

[1] This is analogous to: Angina Seng (<https://math.stackexchange.com/users/436618/angina-seng>), Answer to Question "Constructing a  $4 \times 4$  orthogonal matrix having  $\frac{1}{2}(1, 1, 1, 1)$  as its first row" at <https://math.stackexchange.com/a/2241474> (2017-04-19)

The PDF-export of this notebook was prepared using the Eisvogel pandoc LaTeX template (<https://github.com/Wandmalfarbe/pandoc-latex-template>).

## Appendix: Checks for Correctness

### 3x3 Problem

Check orthonormality of B\_3x3:

```
1 sy.simplify(B_3x3 * B_3x3.transpose()) # OK
```

$$\begin{bmatrix} 1 & 0 \\ 0 & 1 \end{bmatrix}$$

Check orthonormality of A\_3x3:

```
1 sy.simplify(A_3x3 * A_3x3.transpose()) # OK, since l_1 normalized and  $\sum b_i^2 = 1$ 
```

$$\begin{bmatrix} b_1^2 + b_2^2 + b_3^2 & 0 & 0 \\ 0 & 1 & 0 \\ 0 & 0 & b_1^2 + b_2^2 + b_3^2 \end{bmatrix}$$

Check orthonormality of L\_3x3:

```
1 LLt_3x3 = sy.simplify(L_3x3 * L_3x3.transpose())
2 LLt_3x3
```

$$\begin{bmatrix} b_1^2 + b_2^2 + b_3^2 & 0 & 0 \\ 0 & b_1^2 \sin^2(\theta) + b_2^2 \sin^2(\theta) + b_3^2 \sin^2(\theta) + \cos^2(\theta) & \frac{(-b_1^2 - b_2^2 - b_3^2 + 1) \sin(2\theta)}{2} \\ 0 & \frac{(-b_1^2 - b_2^2 - b_3^2 + 1) \sin(2\theta)}{2} & b_1^2 \cos^2(\theta) + b_2^2 \cos^2(\theta) + b_3^2 \cos^2(\theta) + \sin^2(\theta) \end{bmatrix}$$

Since it is not obvious that `LLt_3x3` is the identity matrix, we check using random numeric examples:

```

1 def random_input_3x3():
2     l1 = np.random.random(3)
3     N = np.square(l1).sum()
4     l1 /= np.sqrt(N) # normalize row vector l1
5     theta = np.random.random() * 2 * np.pi
6     return dict(b1=l1[0], b2=l1[1], b3=l1[2], theta=theta)
7
8
9 random_input_3x3() # one example input

```

```

1 {'b1': 0.5115226730713363,
2  'b2': 0.7444348247274318,
3  'b3': 0.42914024125802147,
4  'theta': 0.651800984492223}

```

```

1 LLt_3x3.subs(random_input_3x3()) # one evaluation of an example input

```

$$\begin{bmatrix} 1.0 & 0 & 0 \\ 0 & 1.0 & -5.27174402048658 \cdot 10^{-17} \\ 0 & -5.27174402048658 \cdot 10^{-17} & 1.0 \end{bmatrix}$$

```

1 # checking orthonormality of L_3x3 numerically
2
3 np.random.seed(1)
4
5 for _ in range(1000): # 1000 random tries
6     LLt = LLt_3x3.subs(random_input_3x3())
7     assert abs(LLt[0, 0]) - 1 < 1e-15
8     assert abs(LLt[1, 1]) - 1 < 1e-15
9     assert abs(LLt[2, 2]) - 1 < 1e-15
10    assert abs(LLt[0, 1]) < 1e-15
11    assert abs(LLt[0, 2]) < 1e-15
12    assert abs(LLt[1, 2]) < 1e-15

```

**4x4 Problem**

Check orthonormality of B\_4x4:

```
1 sy.simplify(B_4x4 * B_4x4.transpose()) # OK
```

$$\begin{bmatrix} 1 & 0 & 0 \\ 0 & 1 & 0 \\ 0 & 0 & 1 \end{bmatrix}$$

Check orthonormality of A\_4x4:

```
1 sy.simplify(A_4x4 * A_4x4.transpose()) # OK, since l_1 normalized and  $\sum b_i^2 = 1$ 
```

$$\begin{bmatrix} b_1^2 + b_2^2 + b_3^2 + b_4^2 & 0 & 0 & 0 \\ 0 & b_1^2 + b_2^2 + b_3^2 + b_4^2 & 0 & 0 \\ 0 & 0 & b_1^2 + b_2^2 + b_3^2 + b_4^2 & 0 \\ 0 & 0 & 0 & b_1^2 + b_2^2 + b_3^2 + b_4^2 \end{bmatrix}$$

Check orthonormality of L\_4x4:

```
1 sy.simplify(L_4x4 * L_4x4.transpose()) # OK, since l_1 normalized and  $\sum b_i^2 = 1$ 
```

$$\begin{bmatrix} b_1^2 + b_2^2 + b_3^2 + b_4^2 & 0 & 0 & 0 \\ 0 & b_1^2 + b_2^2 + b_3^2 + b_4^2 & 0 & 0 \\ 0 & 0 & b_1^2 + b_2^2 + b_3^2 + b_4^2 & 0 \\ 0 & 0 & 0 & b_1^2 + b_2^2 + b_3^2 + b_4^2 \end{bmatrix}$$

---

## **Part 3: Data Evaluation Notebook (Deperturbation)**

## Introduction

This document is a converted Jupyter notebook and therefore contains code blocks alongside some explanatory running text. The code shows how coupling elements and deperturbed wavenumbers of dark states, as discussed in Section 4.4 of the main paper, were derived. If a code block produces some output, the output is shown directly under it. Much of this notebook is just function definitions to run the data evaluation across all data sets, using the Julia package `Fermix4x4` (ESI Section 2). The functions are documented with comments and/or "docstrings" (multi line strings enclosed in `"""` directly above the associated function definition). The main output of the notebook is a table of all required deperturbed positions/coupling elements (shown in the notebook and stored in `fermi_analysis_results.csv`). Also, plots that visualize the resulting deperturbed positions together with the spectra and input intensities/band positions are shown.

The notebook and the associated files are available from the GRO.data repository referenced in the main text (<https://doi.org/10.25625/KRTNYQ>). It can be run in a container via Podman (<https://podman.io>). To build the container with podman, use the command line and run:

```
podman build --tag amine-water-fermi-analysis -f Dockerfile
```

The produced image is tagged with `amine-water-fermi-analysis`, so we run the container from this image:

```
podman run --rm --publish 8888:8888 --volume $(pwd):/home/jovyan/work:z --users=keep-id amine-water-fermi-analysis:latest
```

(Tested using a Linux PC running Fedora 41. Note that the commands must be executed from within the folder containing the `Dockerfile`. Building and running with Docker, <https://www.docker.com/>, should also work, but is untested.)

## Analysis

Preamble:

```
1 import Pkg
2 Pkg.activate(".")
```

```
1 Activating project at `~/work`
```



### Part 3: Data Evaluation Notebook (Deperturbation)

---

```
1 # uncomment to install matching version of Fermi4x4 package
2 # (pinned via git commit SHA, keyword `rev`)
3 # Pkg.add(Pkg.PackageSpec(;url = "https://gitlab.gwdg.de/nluetts/fermi4x4.jl", rev = "b2ddda13812d77f4334de309b1c5636c19660952"))
```

```
1 using Fermi4x4
2 using Fermi4x4: ±, select_valid
3 using Markdown
4 using MonteCarloMeasurements: Particles, pmean, pstd
5 using PrettyTables
6 using Printf
7 using Random: seed!
8
9 seed!(42);
```

Define constants and helper functions:

```
1 # overwrite Fermi4x4 default behavior
2 Fermi4x4.RETRIES = 100
3 Fermi4x4.CONV_THRES = 1e-7
4
5 # raw input data, provided through a CSV file containing all
6 # required experimental band centers and intensities (and their
7 # uncertainties)
8 RAW_LINES = readlines("amines_band_center_and_intensity.csv")[2:end, :]
9 # labels of all measured substances
10 LABELS = [ "MN4", "MN5", "MNSMMMM", "N555", "MMEN", "MMIN", "MMCN", "MMTN" ]
11
12 """
13 Extract band positions and intensities from RAW_LINES for a specific substance.
14 """
15 function extract_data(label)
16     selected_rows = filter(row -> split(split(row, ',')[1], '_')[1] == label, RAW_LINES)
17     getcol(i) = [parse(Float64, split(row, ',')[i]) for row in selected_rows]
18     wavenumbers = [x ± ux for (x, ux) in zip(getcol(2), getcol(3))]
19     intensities = [x ± ux for (x, ux) in zip(getcol(4), getcol(5))]
20     # account for wavenumber dependence of integrated absorption coefficient:
21     # integral of absorption coefficient ~ transition moment2 × wavenumber
22     # (JM Hollas, "Modern Spectroscopy", 4th Ed., Wiley, 2004. Eqn. 2.17)
23     intensities = [int/wn for (wn, int) in zip(wavenumbers, intensities)]
24     # intensities are normalized to sum to 1
25     norm = sum(intensities)
26     intensities /= norm
27
28     bands([Band(wn, int) for (wn, int) in zip(wavenumbers, intensities)]...)
29 end
30
31 """
32 Format uncertain number.
33 """
```

### Part 3: Data Evaluation Notebook (Deperturbation)

```
34 function to_str(val, unc)
35     udigits = -log10(unc) |> ceil |> Int
36     vdigits = -log10(val) |> ceil |> Int
37     if round(unc * 10^(udigits)) == 10
38         udigits -= 1
39     end
40     if 0 <= udigits < 5
41         @sprintf "%.*f(%i)" udigits val unc * 10^(udigits)
42     elseif udigits >= 5 && vdigits > 2 && vdigits <= udigits
43         @sprintf "%.*f(%i)e-%02i" udigits - vdigits val * 10^(vdigits) unc * 10^(udigits) vdigits
44     elseif udigits >= 5
45         @sprintf "%.*f(%i)" udigits val unc * 10^(udigits)
46     else
47         @info udigits, vdigits
48         error("Not Implemented") |> throw
49     end
50 end
51
52 to_str(x::Particles) = to_str(pmean(x), pstd(x))
53 to_str(x::String) = x;
```

Define functions to perform and display data analysis:

```
1  """
2  Calculate the center of gravity of the bands, which should be the same as the
3  deperturbed OHb wavenumber retrieved with the Fermi4x4 package and thus
4  serves as a basic sanity check that the retrieved D matrix is correct.
5  """
6  function center_of_gravity(bds)
7      wns = map(x -> x.nu, bds)
8      ints = map(x -> x.int, bds)
9      # Normalize intensities to sum to 1. To do this for the uncertain number
10     # type from MonteCarloMeasurements, we have to manipulate the individual
11     # "particles" directly.
12     for i in eachindex(ints[1].particles)
13         N = sum(int.particles[i] for int in ints)
14         for int in ints
15             int.particles[i] /= N
16         end
17     end
18     wns .* ints |> sum
19 end
20
21 """
22 Solve the 4x4 problem (model C), forcing the coupling element of the dark states
23 (state 2, 3, and 4) to zero.
24 """
25 function deperturb_4x4(bds)
26     cpls = ucouplings_4x4()
27     uncouple!(cpls, 2, 3)
```

### Part 3: Data Evaluation Notebook (Deperturbation)

---

```
28     uncouple!(cpls, 2, 4)
29     uncouple!(cpls, 3, 4)
30     solve(bds, cpls; verify=true, show_verify=true)
31 end
32
33
34 """
35 Solve the 3x3 problem (model B), forcing the coupling element of the dark states
36 (state 2 and 3) to zero.
37 """
38 function deperturb_3x3(bds)
39     bds = bands(bds[1:3]...)
40     cpls = ucouplings_3x3()
41     uncouple!(cpls, 2, 3)
42     solve(bds, cpls; verify=false)
43 end
44
45 """
46 Solve the 2x2 problem (model A) using the 3x3 solver with on band set to zero.
47 """
48 function deperturb_2x2(bds)
49     bds = bands(Band(0.0 ± 0.0, 0.0 ± 0.0), bds[1:2]...)
50     cpls = ucouplings_3x3()
51     uncouple!(cpls, 2, 3)
52     solve(bds, cpls; verify=true, show_verify=true)
53 end
54
55
56 """
57 Evaluate models for all measurements and return the results
58 formatted in a table.
59 """
60 function run_all()
61     results = Dict{String, Any}()
62     row_labels = [
63         "Input Position OHb",
64         "Input Position b2",
65         "Input Position b20N",
66         "Input Position x0Nn",
67         "Input Intensity OHb",
68         "Input Intensity b2",
69         "Input Intensity b20N",
70         "Input Intensity x0Nn",
71         "Pos. Center of Gravity (Centroid C)",
72         "Depert. Pos. D_OHb (C)",
73         "Depert. Pos. D_b2 (C)",
74         "Depert. Pos. D_b20N (C)",
75         "Depert. Pos. D_x0Nn (C)",
76         "Coupling OHb <> b2 (C)",
77         "Coupling OHb <> b20N (C)",
78         "Coupling OHb <> x0Nn (C)",
79         "Pos. Center of Gravity (Centroid B)",
```

```

80     "Depert. Pos. D_0Hb (B)",
81     "Depert. Pos. D_b2 (B)",
82     "Depert. Pos. D_b2ON (B)",
83     "Coupling OHb <> b2 (B)",
84     "Coupling OHb <> b2ON (B)",
85     "Depert. Pos. D_b2 (A)",
86     "Depert. Pos. D_0Hb (A)",
87     "Coupling OHb <> b2 (A)",
88 ]
89 cols = [row_labels, [[] for _ in LABELS]...]
90 dat = [extract_data(label) for label in LABELS]
91 Threads.@threads for i in 1:length(LABELS)
92     bds = dat[i]
93     D4 = deperturb_4x4(bds)
94     C4 = center_of_gravity(bds)
95     D3 = deperturb_3x3(bds)
96     C3 = center_of_gravity(bds[1:3])
97     results[LABELS[i]] = (D3, D4)
98     D2 = deperturb_2x2(bds)
99     cols[i+1] = [
100         bds[2].nu, # see row_labels ...
101         bds[1].nu,
102         bds[3].nu,
103         bds[4].nu,
104         bds[2].int,
105         bds[1].int,
106         bds[3].int,
107         bds[4].int,
108         C4,
109         D4[1,1],
110         D4[2,2],
111         D4[3,3],
112         D4[4,4],
113         D4[1,2],
114         D4[1,3],
115         D4[1,4],
116         C3,
117         D3[1,1],
118         D3[2,2],
119         D3[3,3],
120         D3[1,2],
121         D3[1,3],
122         D2[3,3],
123         D2[1,1],
124         D2[1,3],
125     ]
126 end
127 io = IOBuffer();
128 pretty_table(io, hcat([to_str.(c) for c in cols]...); header = ["", LABELS...], backend=Val{:markdown});
129 results, cols, io
130 end;

```

Run analysis and display results:

```
1 results, columns, io = run_all();
2 Markdown.parse(String(take!(io)))
```

|                                     | <b>MN4</b> | <b>MN5</b> | <b>MN5MMM</b> | <b>N555</b> | <b>MMEN</b> | <b>MMIN</b> | <b>MMCN</b> | <b>MMTN</b> |
|-------------------------------------|------------|------------|---------------|-------------|-------------|-------------|-------------|-------------|
| Input Position OHb                  | 3299.2(3)  | 3289.4(4)  | 3257.5(4)     | 3296.7(7)   | 3300.9(2)   | 3284.7(4)   | 3282.0(3)   | 3268.6(5)   |
| Input Position b2                   | 3190.8(8)  | 3188.7(9)  | 3176.2(3)     | 3193.3(4)   | 3191.4(3)   | 3187.0(3)   | 3186.1(2)   | 3180.2(3)   |
| Input Position b2ON                 | 3347.6(4)  | 3342.3(4)  | 3334(2)       | 3351.2(5)   | 3351.6(6)   | 3348.0(3)   | 3347.1(6)   | 3344.4(7)   |
| Input Position xONn                 | 3441(1)    | 3429(1)    | 3393.1(8)     | 3441(2)     | 3446(2)     | 3431(1)     | 3426.6(7)   | 3413(1)     |
| Input Intensity OHb                 | 0.61(3)    | 0.64(4)    | 0.40(3)       | 0.53(3)     | 0.60(3)     | 0.55(2)     | 0.51(4)     | 0.46(3)     |
| Input Intensity b2                  | 0.20(3)    | 0.22(4)    | 0.42(3)       | 0.28(2)     | 0.19(3)     | 0.30(2)     | 0.29(3)     | 0.38(3)     |
| Input Intensity b2ON                | 0.19(3)    | 0.13(2)    | 0.17(4)       | 0.19(2)     | 0.21(2)     | 0.15(1)     | 0.20(3)     | 0.16(2)     |
| Input Intensity xONn                | 0.03(2)    | 0.05(1)    | 0.08(1)       | 0.04(2)     | 0.02(1)     | 0.03(2)     | 0.036(9)    | 0.03(1)     |
| Pos. Center of Gravity (Centroid C) | 3292(5)    | 3281(5)    | 3248(5)       | 3284(4)     | 3294(4)     | 3270(3)     | 3273(4)     | 3252(4)     |
| Depert. Pos. D_OHb (C)              | 3292(5)    | 3281(5)    | 3248(5)       | 3284(4)     | 3294(4)     | 3270(3)     | 3273(4)     | 3252(4)     |
| Depert. Pos. D_b2 (C)               | 3214(4)    | 3212(4)    | 3214(3)       | 3225(3)     | 3213(3)     | 3218(2)     | 3216(3)     | 3217(2)     |
| Depert. Pos. D_b2ON (C)             | 3337(1)    | 3334(1)    | 3315(4)       | 3338(1)     | 3339(1)     | 3336.0(9)   | 3331(2)     | 3328(3)     |
| Depert. Pos. D_xONn (C)             | 3437(3)    | 3423(2)    | 3383(2)       | 3435(3)     | 3444(3)     | 3426(3)     | 3422(1)     | 3409(2)     |
| Coupling OHb <> b2 (C)              | 46(3)      | 44(3)      | 45.4(9)       | 51(1)       | 46(3)       | 48.5(9)     | 48(2)       | 47.0(8)     |
| Coupling OHb <> b2ON (C)            | 23(1)      | 22(1)      | 41(3)         | 27(1)       | 24(1)       | 29(1)       | 33(2)       | 37(2)       |
| Coupling OHb <> xONn (C)            | 24(8)      | 30(5)      | 33(3)         | 27(7)       | 17(9)       | 26(7)       | 25(3)       | 23(7)       |
| Pos. Center of Gravity (Centroid B) | 3287(4)    | 3274(5)    | 3236(5)       | 3278(3)     | 3291(3)     | 3265(2)     | 3268(4)     | 3247(3)     |
| Depert. Pos. D_OHb (B)              | 3287(4)    | 3274(5)    | 3236(5)       | 3278(3)     | 3291(3)     | 3265(2)     | 3268(4)     | 3247(3)     |
| Depert. Pos. D_b2 (B)               | 3214(4)    | 3213(4)    | 3215(3)       | 3225(3)     | 3214(3)     | 3219(2)     | 3217(3)     | 3217(2)     |
| Depert. Pos. D_b2ON (B)             | 3337(1)    | 3334(1)    | 3317(4)       | 3338(1)     | 3339(1)     | 3336.3(9)   | 3331(2)     | 3329(2)     |
| Coupling OHb <> b2 (B)              | 46(3)      | 44(3)      | 43.9(9)       | 50(1)       | 46(3)       | 48.0(9)     | 48(2)       | 46.4(7)     |
| Coupling OHb <> b2ON (B)            | 22(1)      | 21(1)      | 37(4)         | 26(1)       | 24(1)       | 27.7(9)     | 32(2)       | 35(2)       |
| Depert. Pos. D_b2 (A)               | 3218(4)    | 3215(5)    | 3218(3)       | 3229(3)     | 3217(4)     | 3222(2)     | 3220(4)     | 3220(2)     |
| Depert. Pos. D_OHb (A)              | 3272(4)    | 3263(5)    | 3216(3)       | 3261(3)     | 3275(4)     | 3250(2)     | 3248(4)     | 3229(2)     |
| Coupling OHb <> b2 (A)              | 46(3)      | 44(3)      | 40.5(3)       | 49(1)       | 46(2)       | 46.7(7)     | 46(1)       | 43.9(4)     |

Write results to CSV file:

```

1 open("fermi_analysis_results.csv", "w") do f
2   ncols = length(columns)
3   nrows = length(columns[1])
4   write(f, "quantity,")
5   for (i, label) in enumerate(LABELS)
6     write(f, "$(label) mean,$(label) std")
7     if i == ncols - 1
8       write(f, "\n")
9     else
10      write(f, ",")
11    end
12  end
13  for i in 1:nrows
14    for j in 1:ncols
15      val = columns[j][i]
16      if val isa String
17        write(f, val)
18      else
19        mean = @sprintf "%.4f" pmean(val)
20        std = @sprintf "%.4f" pstd(val)
21        write(f, mean, ",", std)
22      end
23      if j == ncols
24        write(f, "\n")
25      else
26        write(f, ",")
27      end
28    end
29  end
30 end

```

Plot input data (spectrum as line plot, input intensities and positions as bar plot) and deperturbed positions (as histograms):

```

1 using Plots
2 using LinearAlgebra
3
4 function visualize(label, D3, D4)
5
6   # plot input data
7   bds = extract_data(label)
8   wns = map(x -> x.nu, bds) |> collect
9   ints = map(x -> x.int, bds) |> collect
10  plt = bar(wns .|> pmean, ints .|> pmean;
11    bar_width=3, linewidth=0.0, color=:gray,
12    label="measured data", title=label, alpha=0.5,
13    xflip=true, xlims=(3150, 3450)
14  )
15  scatter!(wns, ints; shape=:pixel, label=nothing)

```

### Part 3: Data Evaluation Notebook (Deperturbation)

---

```
16
17 # plot settings array_from_fields(ints) array_from_fields(wls)
18 kw = Dict(:fill => true, :color => :magenta, :alpha => 0.5, :normalize => true, :size => (800, 600))
19
20 # plot histograms for 3x3 problem
21 for (i, p) in enumerate(diag(D3))
22     current_label = i == 1 ? "deperturbed position model B (3x3)" : nothing
23     stephist!(plt, p; kw..., normalize=true, label=current_label)
24 end
25
26 # plot histograms for 4x4 problem
27 kw[:color] = :cyan
28 for (i, p) in enumerate(diag(D4))
29     current_label = i == 1 ? "deperturbed position model C (4x4)" : nothing
30     stephist!(plt, p; kw..., normalize=true, label=current_label)
31 end
32
33 xlabel!("wavenumber /  $\mu\text{cm}^{-1}$ ")
34 ylabel!("intensity (stems) or relative frequency (histograms)")
35 end
36
37 for label in LABELS
38     D3, D4 = results[label]
39     visualize(label, D3, D4) |> display
40 end
```

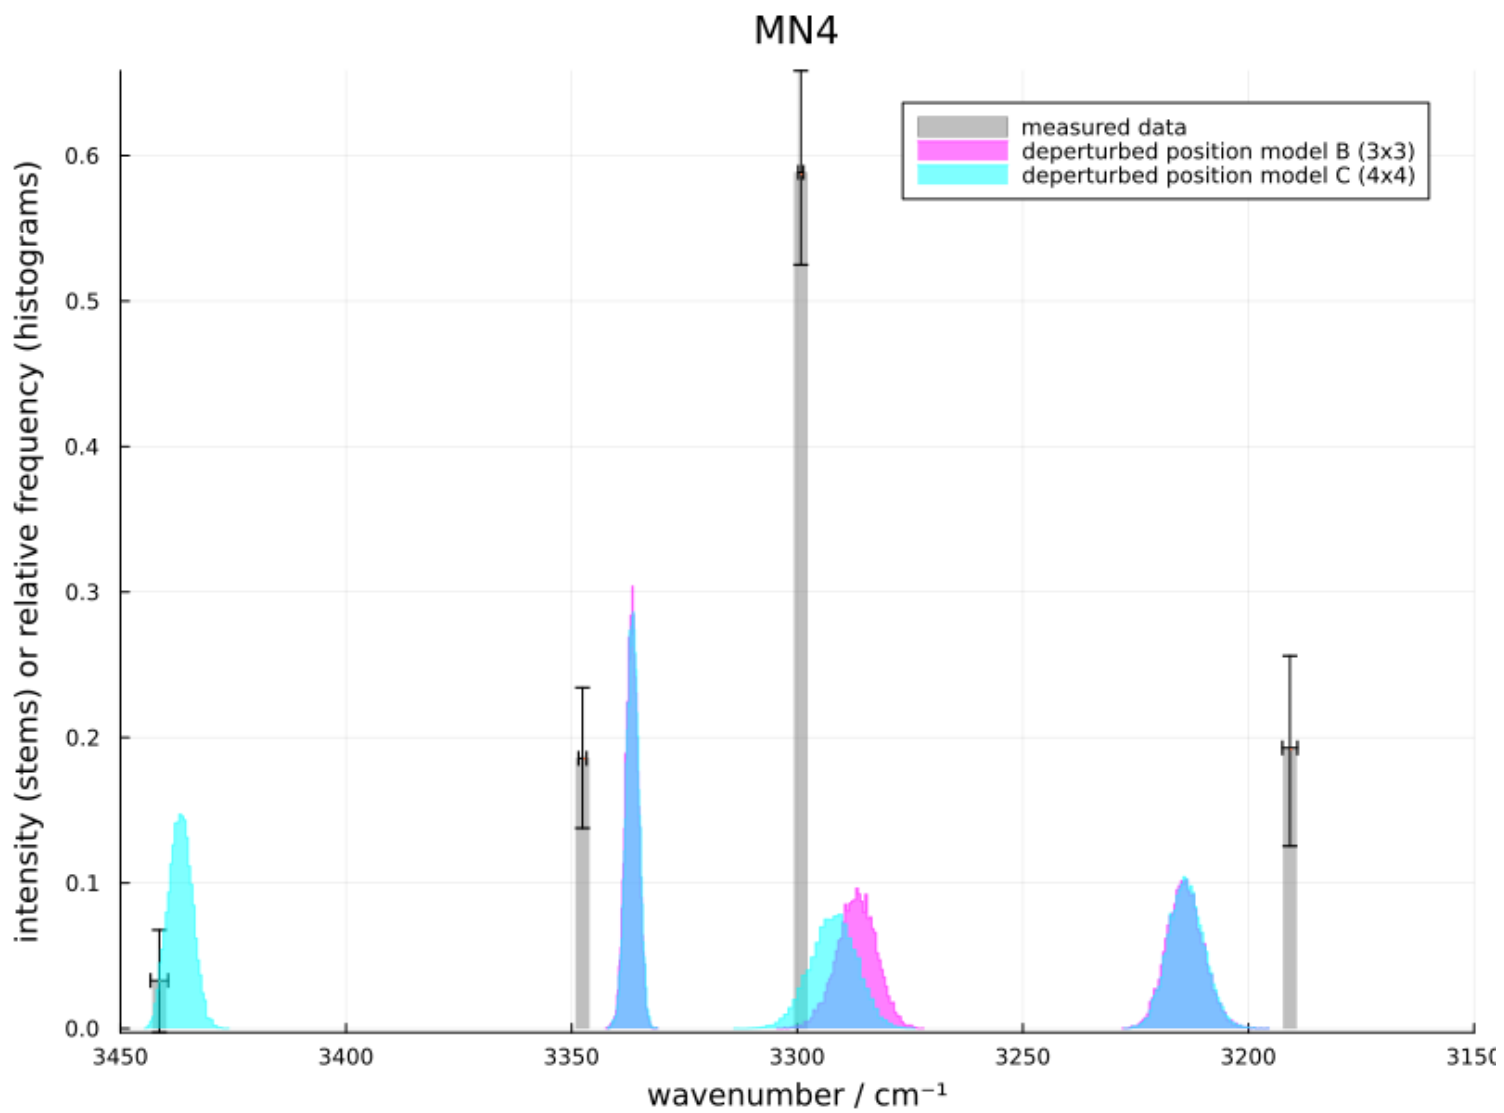



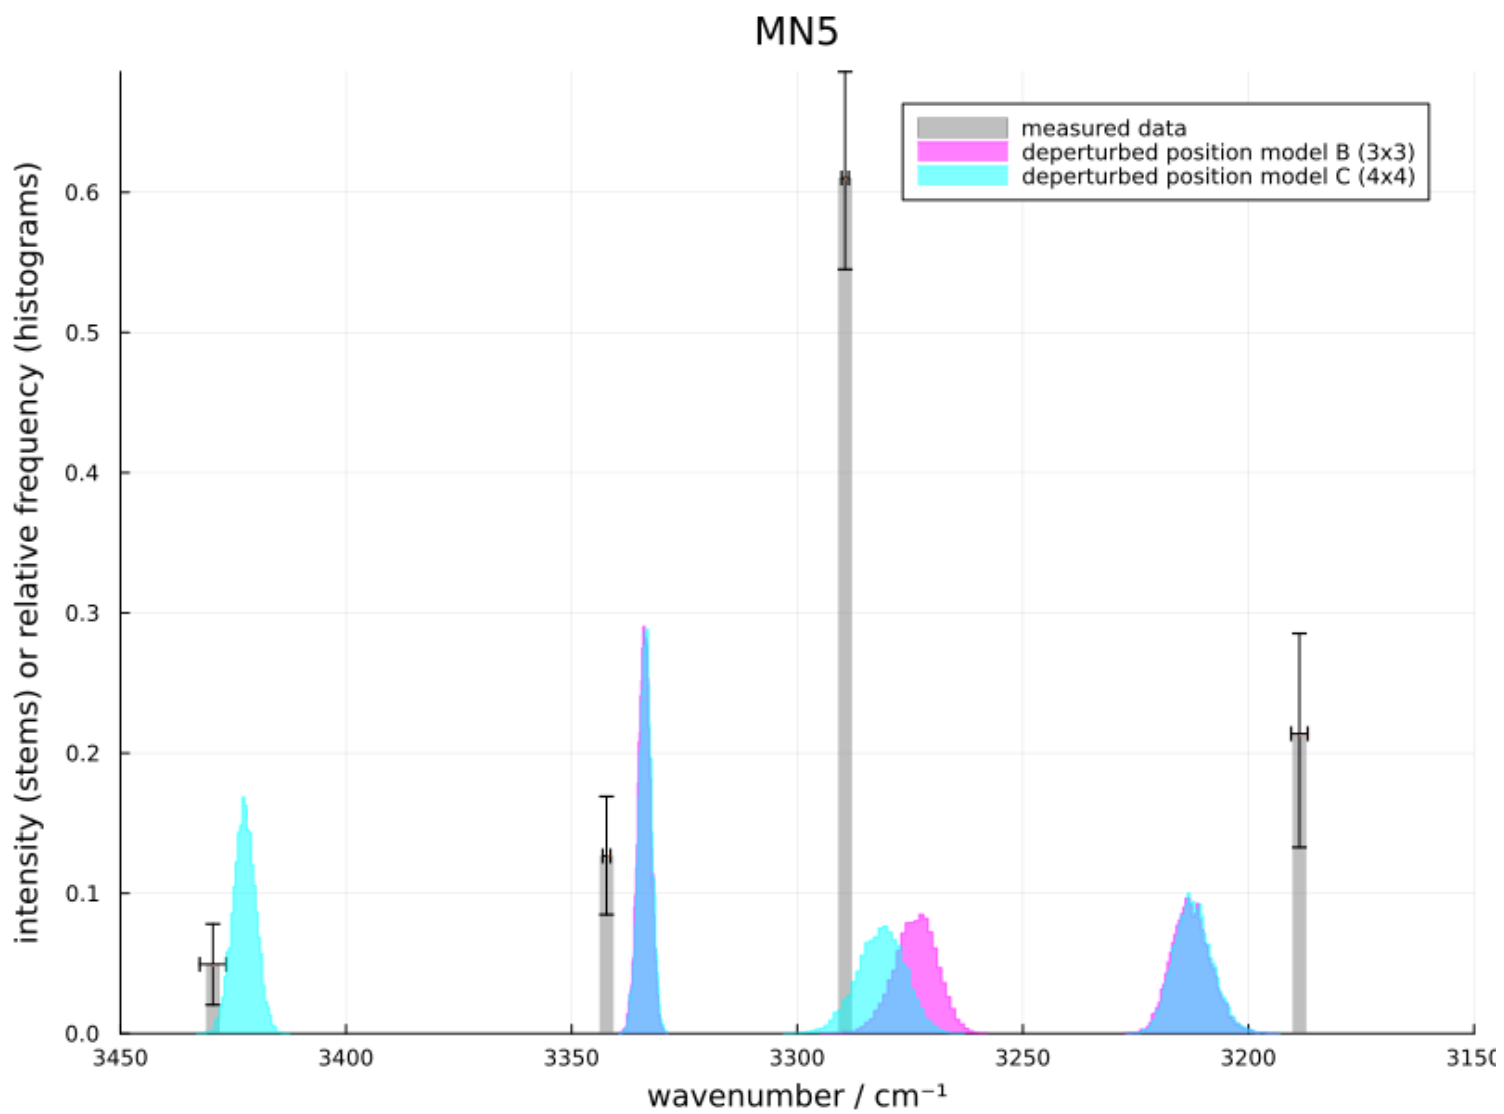

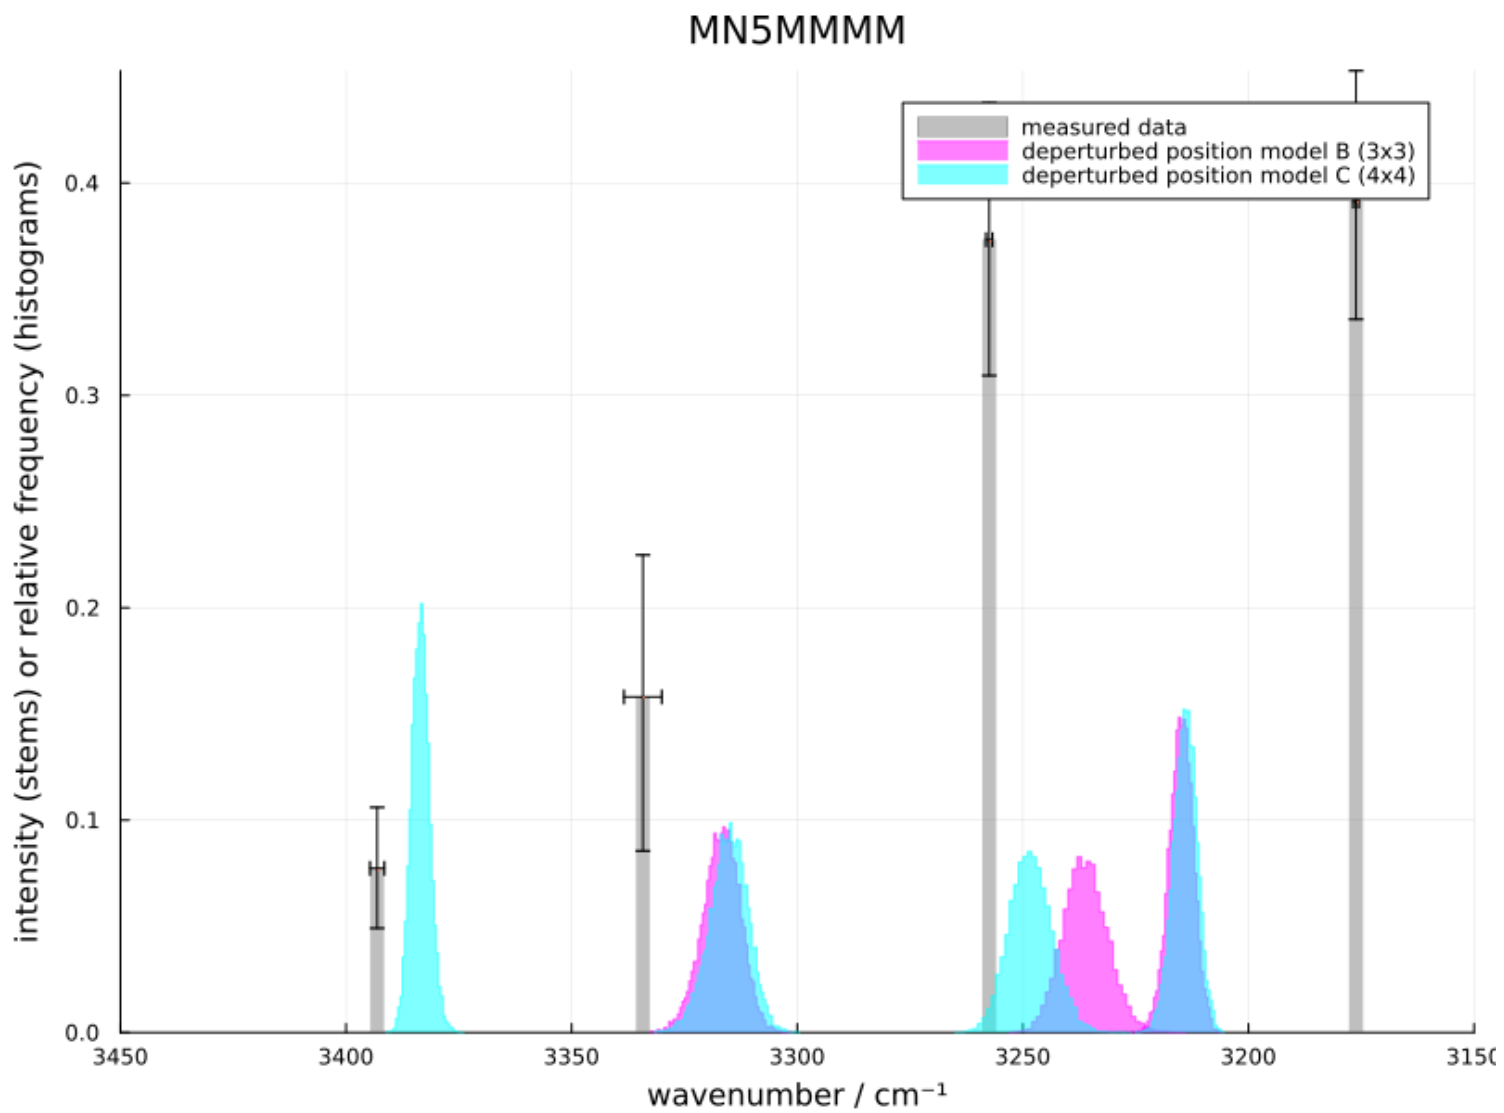

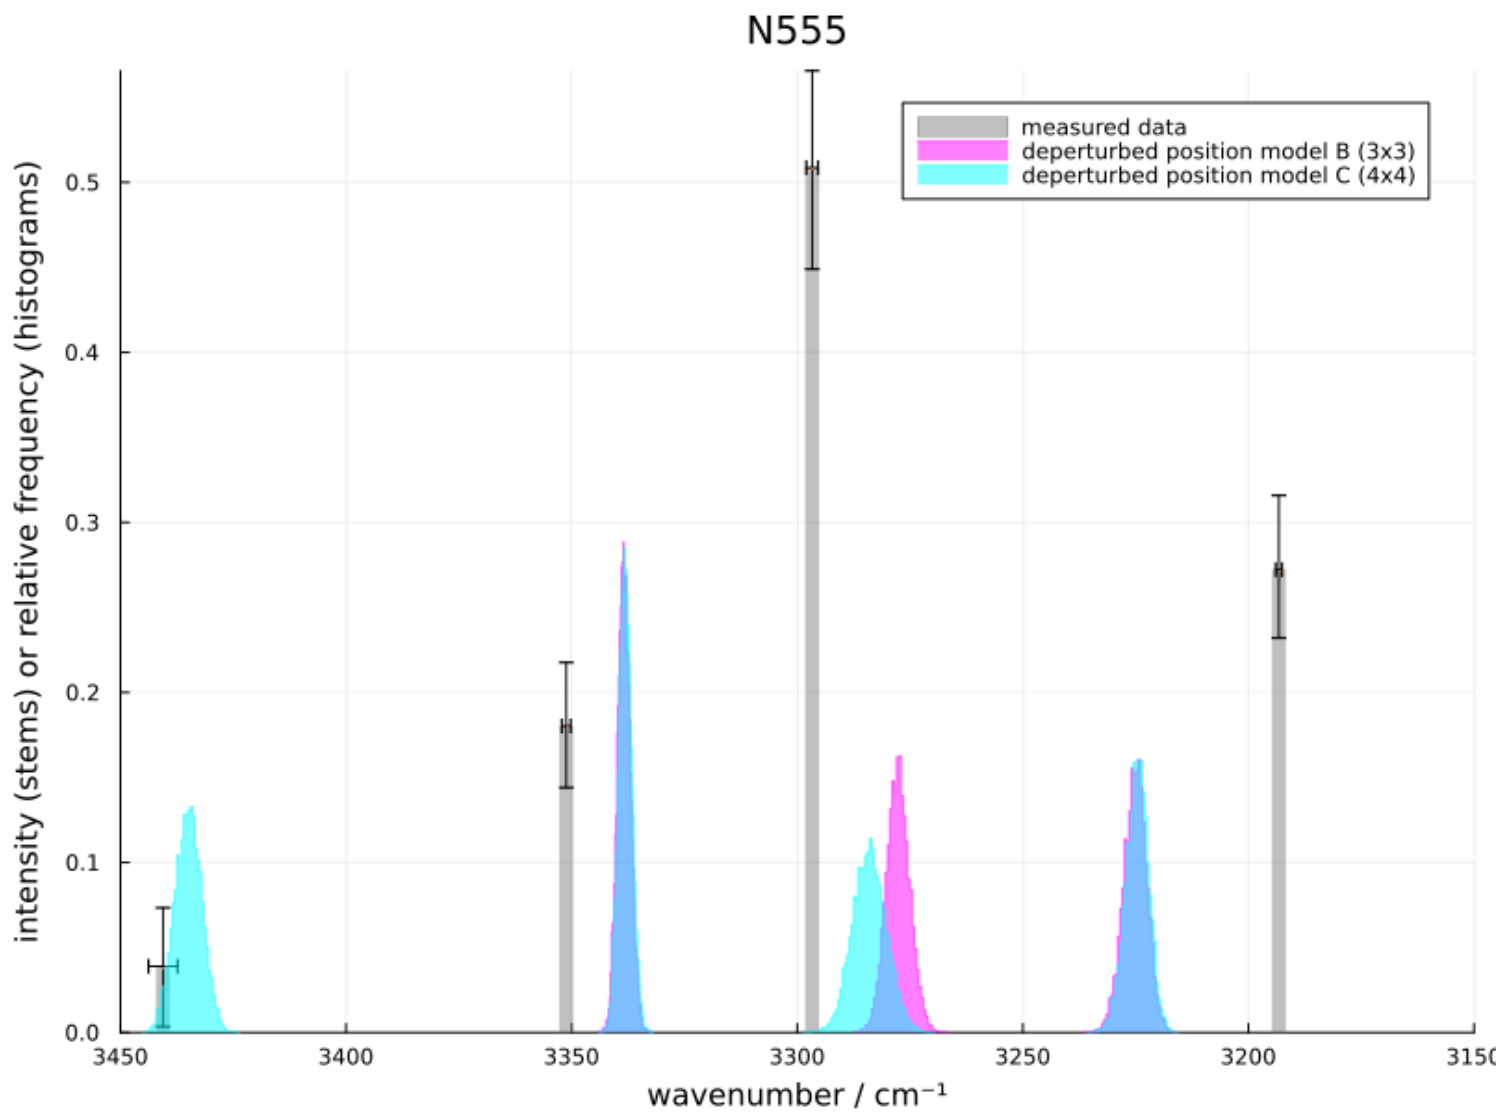

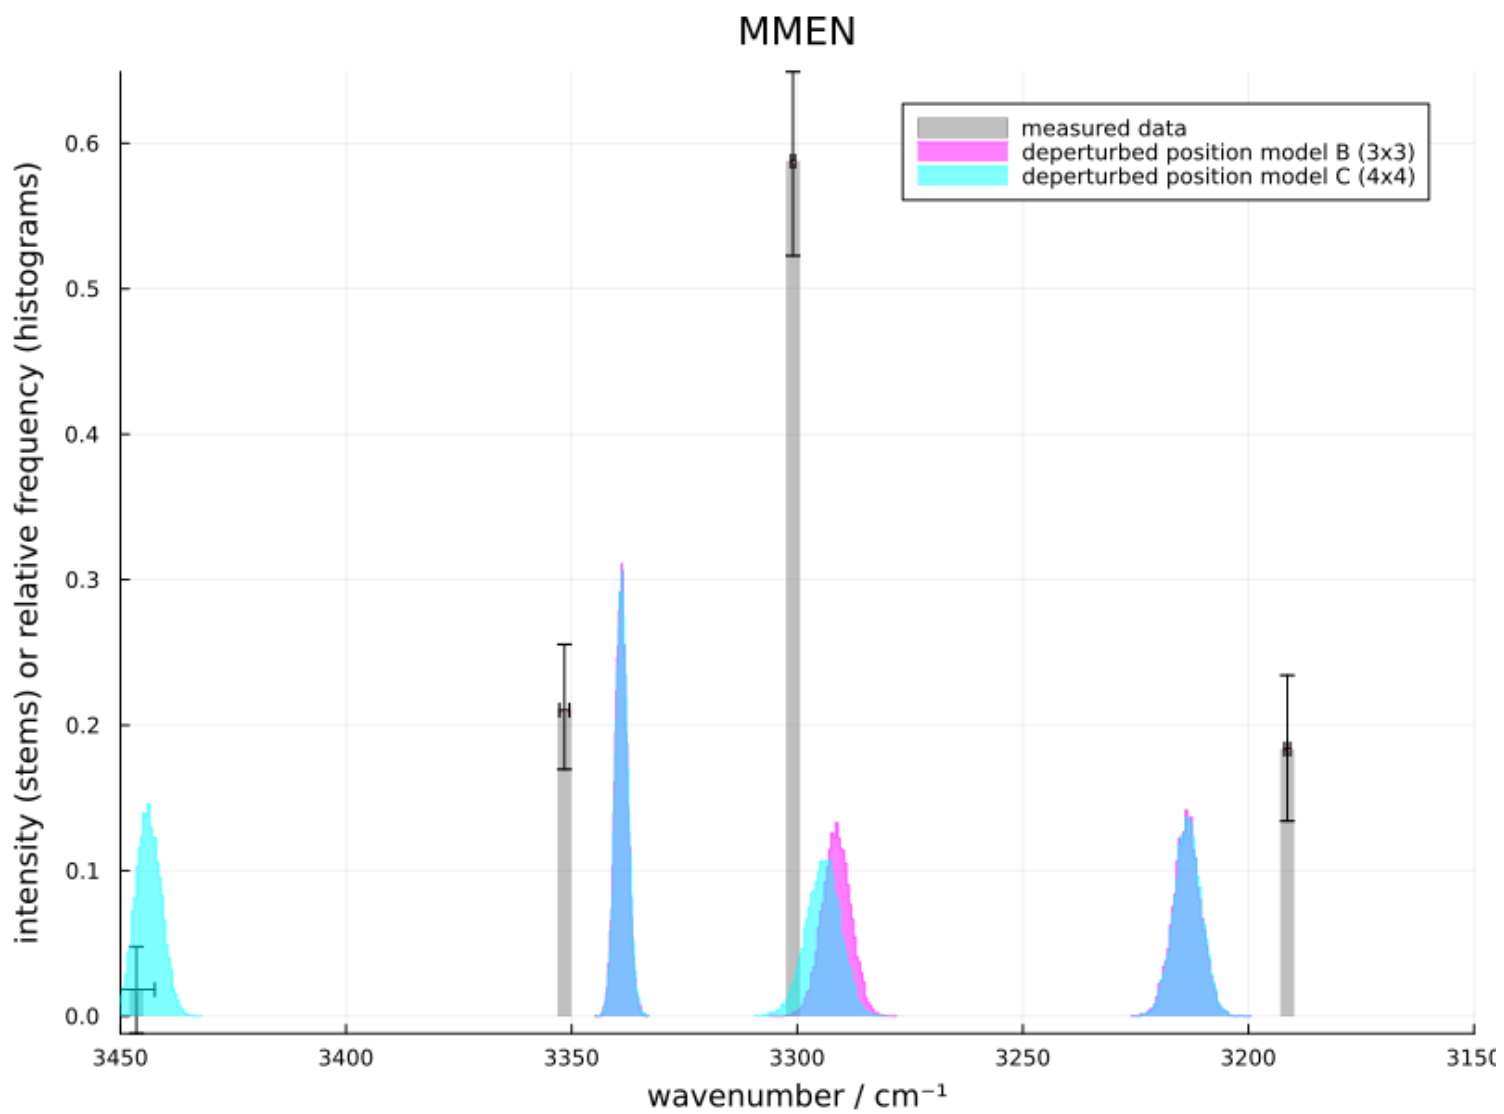

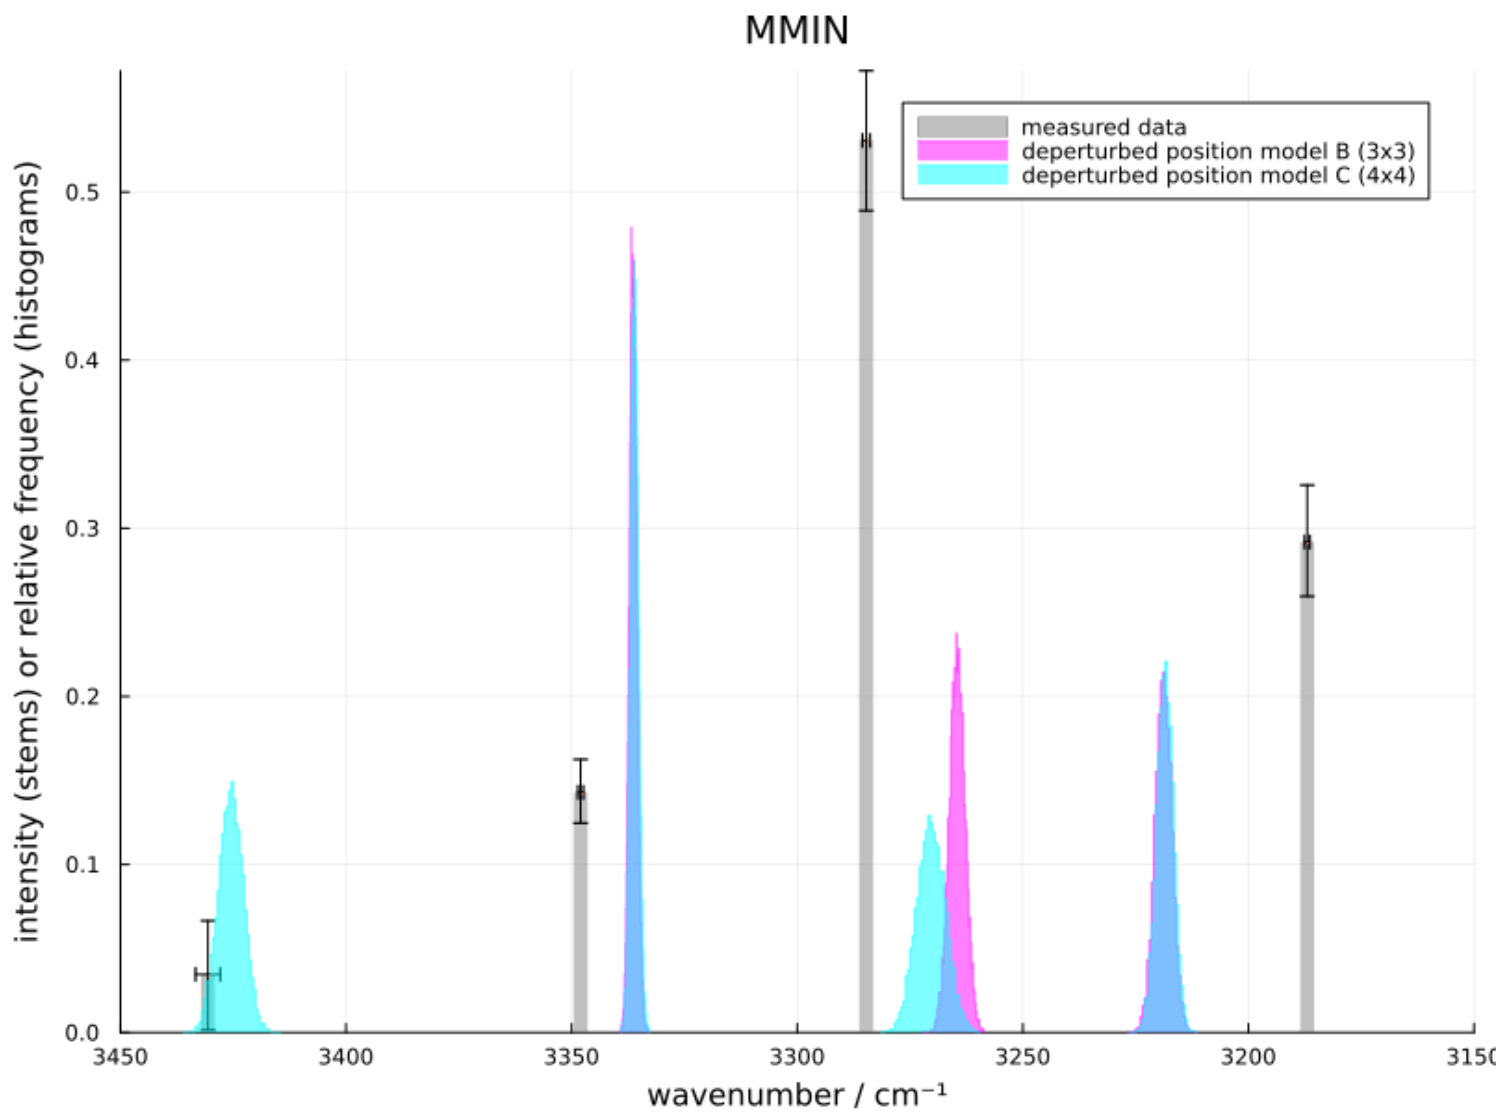

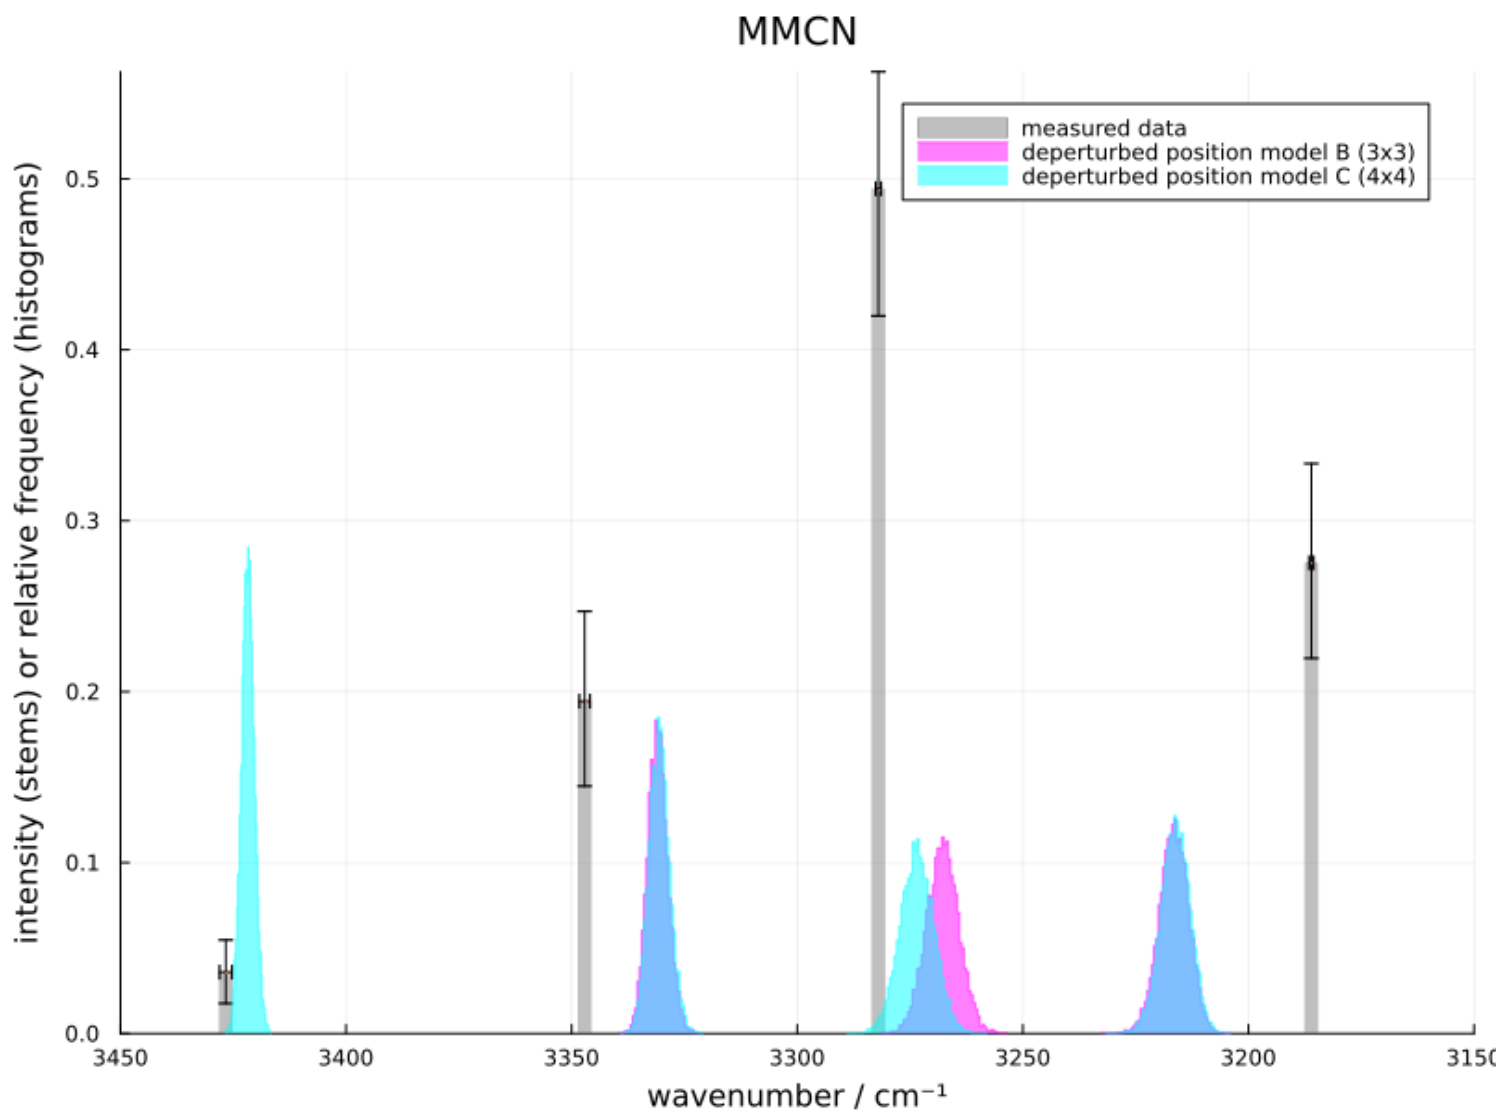

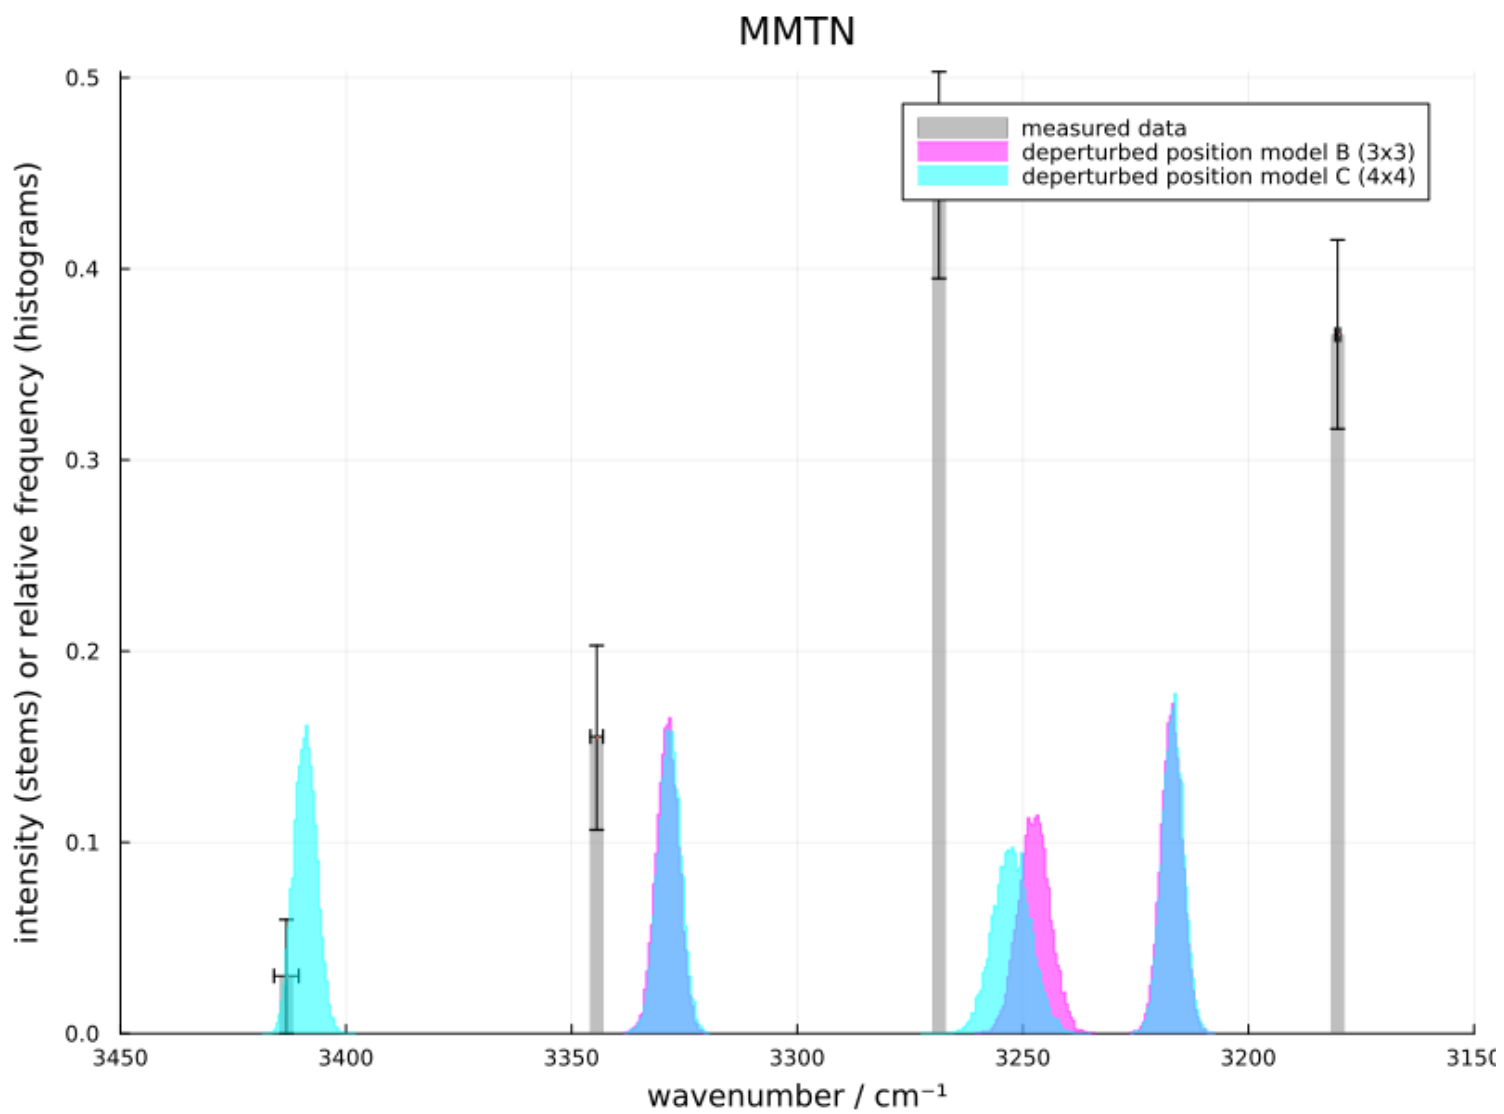

The PDF-export of this notebook was prepared using the Eisevogel pandoc LaTeX template (<https://github.com/Wandmalfarbe/pandoc-latex-template>).
